# Supplementary material for: Construction and validation of a novel angiogenesis pattern to predict prognosis and immunotherapy efficacy in colorectal cancer
Source: Aging (Albany NY). 2023 Nov 7;15(21):12413–50. doi: 10.18632/aging.205189 (PMC10683615; doi:10.18632/aging.205189)
Supplement: Supplementary Figures [file aging-15-205189-s001.pdf]

## SUPPLEMENTARY FIGURES

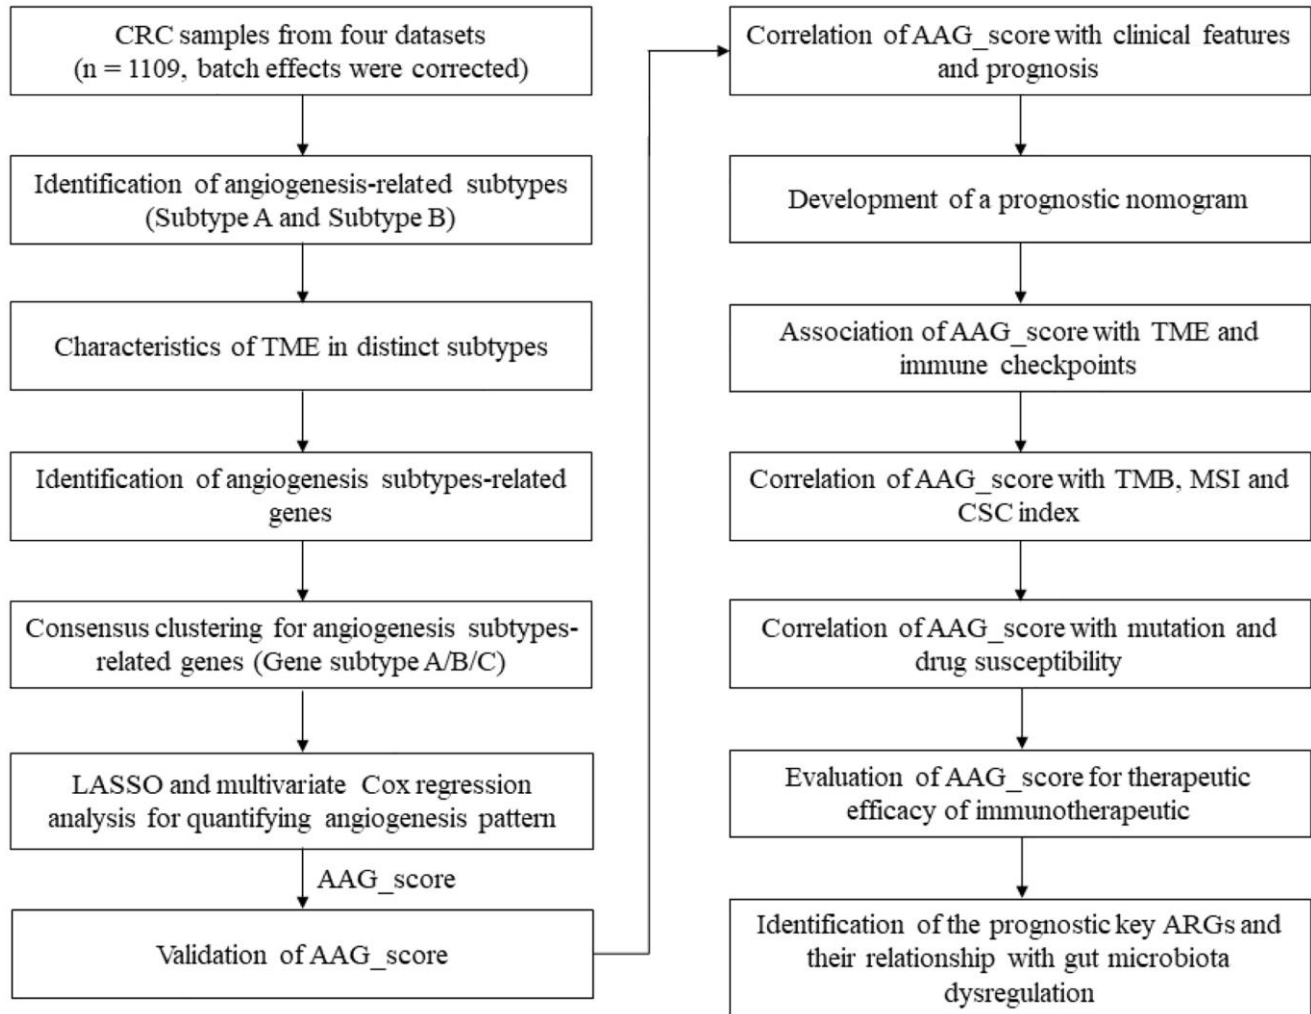

Supplementary Figure 1. The specific workflow graph of data analysis.

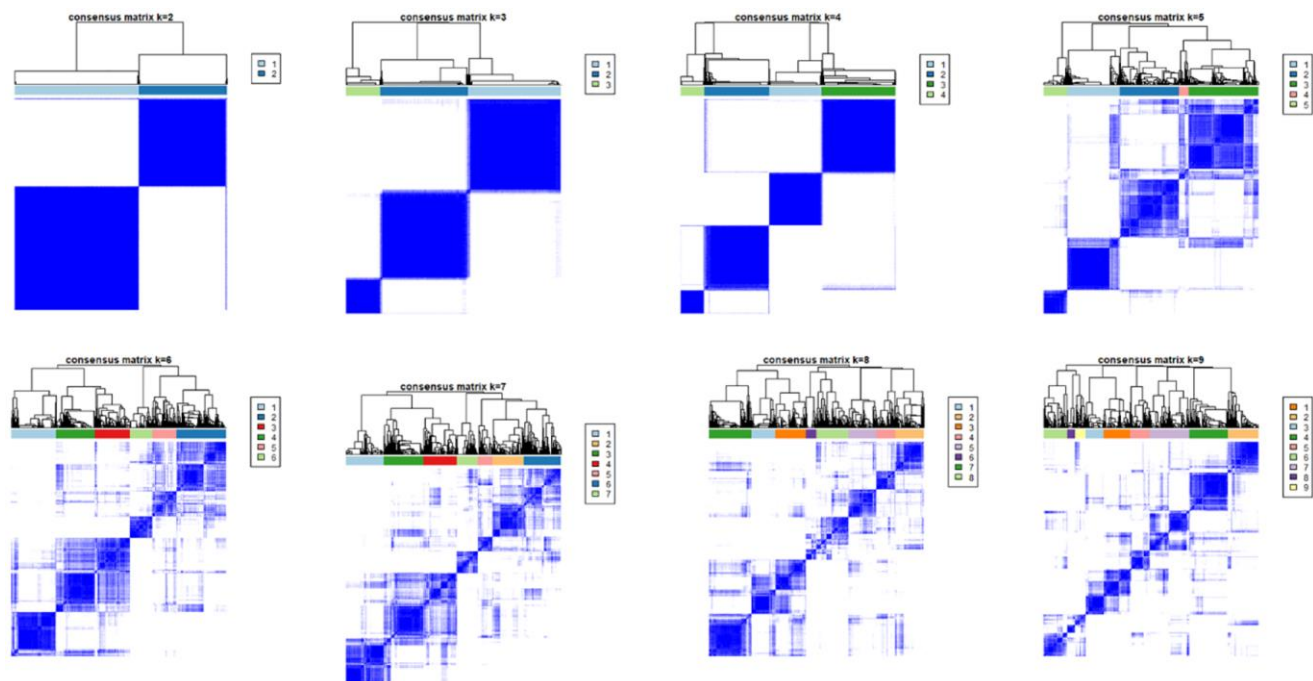

**Supplementary Figure 2. Unsupervised clustering of gene subtypes based on DEGs and Consensus matrix heatmaps for  $k = 2-9$ .**

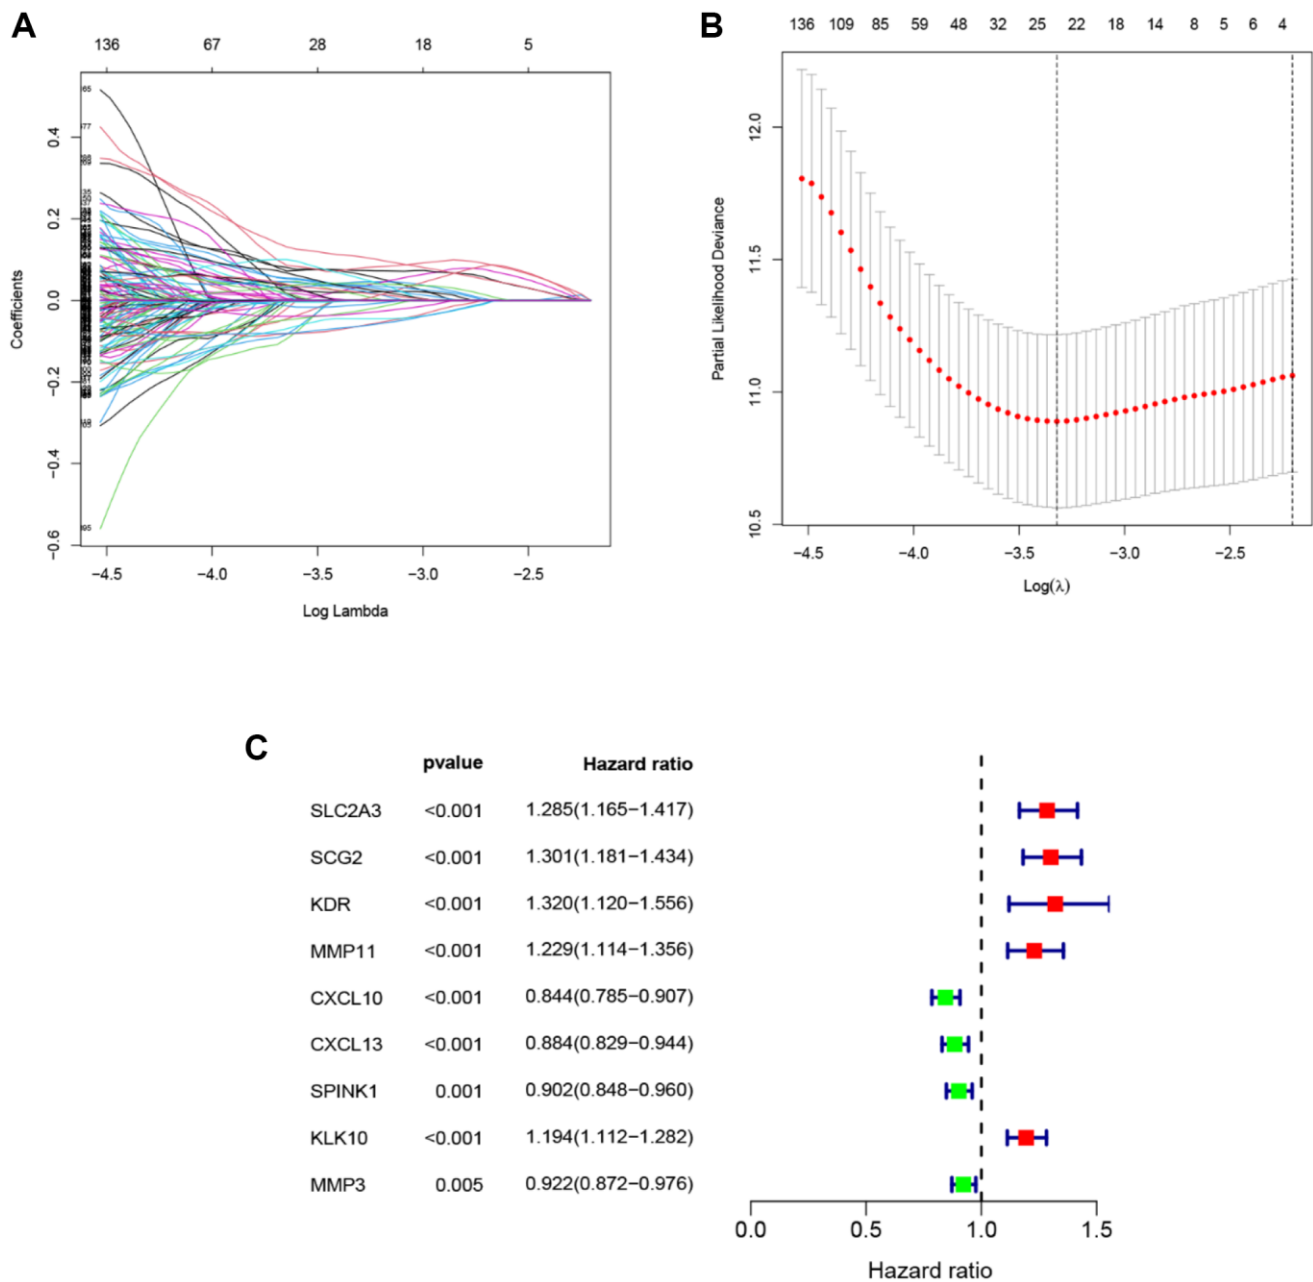

**Supplementary Figure 3. Identifying representative candidate prognostic genes.** (A, B) The LASSO regression analysis and partial likelihood deviance on the prognostic genes. (C) Forest plot of multivariate cox regression analysis for prognostic genes.

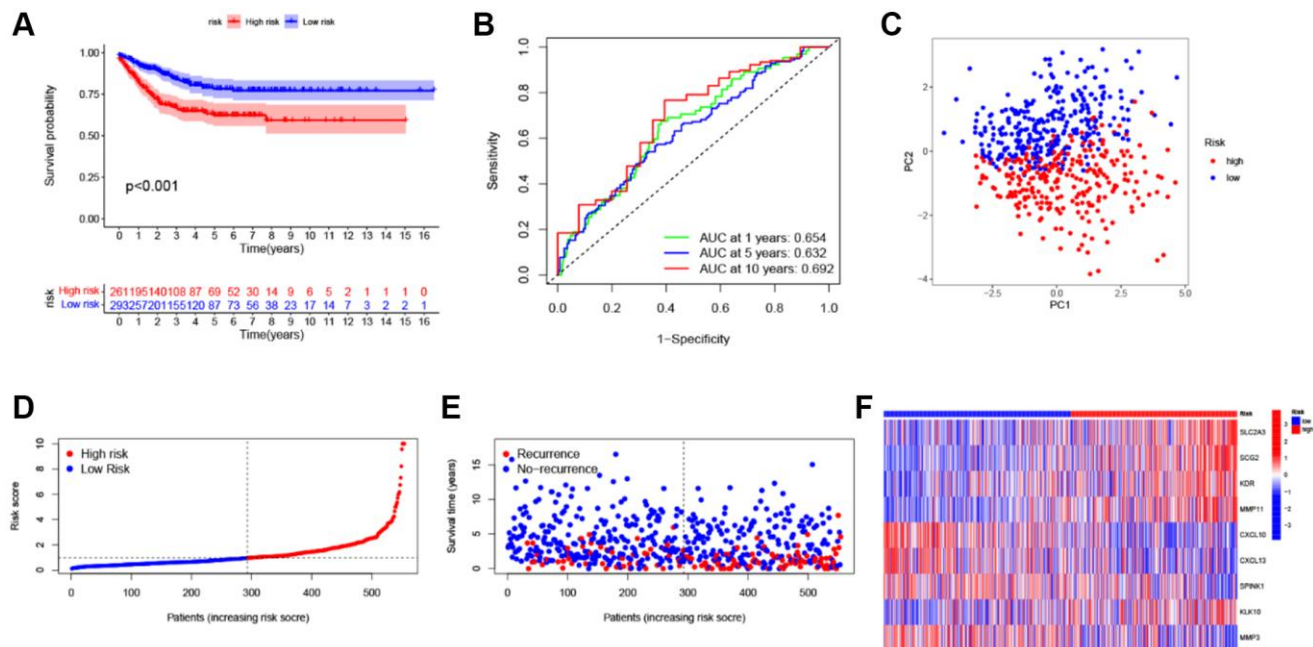

**Supplementary Figure 4. Validation of ARG\_score in testing cohort.** (A) K-M analysis of the RFS between the two ARG\_score groups. (B) ROC curves to predict the sensitivity and specificity of 1-, 5-, and 10-year survival according to the ARG\_score. (C) The PCA analysis demonstrated that the patients in the different ARG\_score groups were distributed in two directions. (D, E) The ranked dot plot indicates the ARG\_score distribution and scatter plot presenting the patients' survival status. (F) Expression patterns of 9 selected prognostic genes in high- and low-ARG\_score groups.

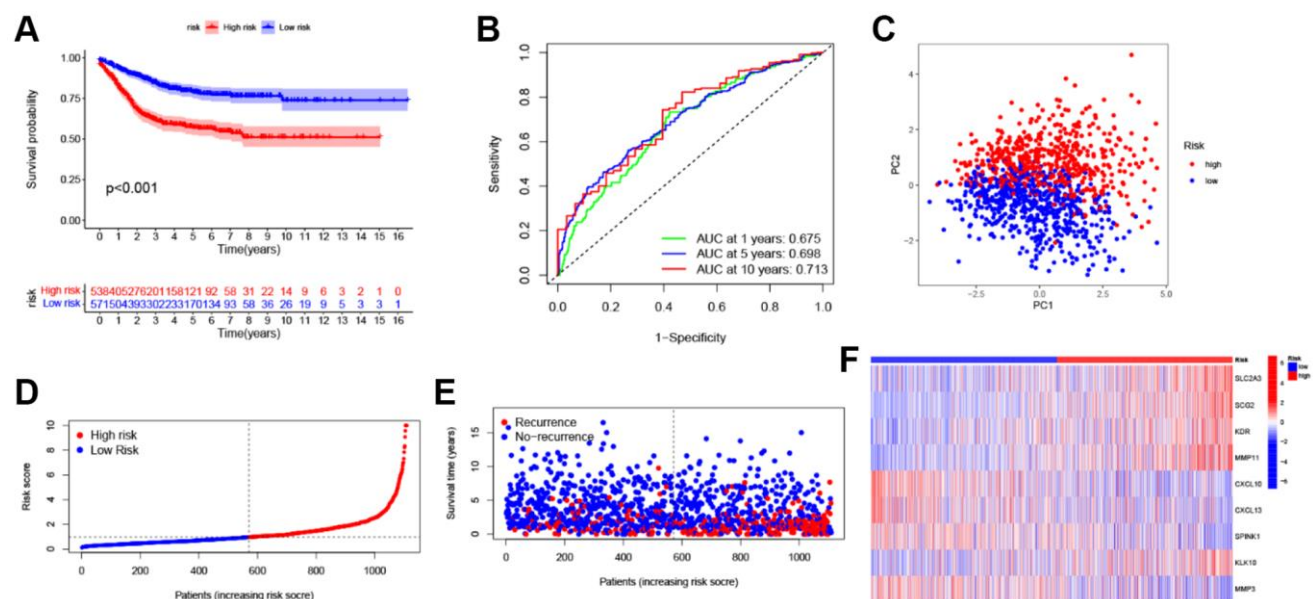

**Supplementary Figure 5. Validation of ARG\_score in entire cohort.** (A) K-M analysis of the RFS between the two ARG\_score groups. (B) ROC curves to predict the sensitivity and specificity of 1-, 5-, and 10-year survival according to the ARG\_score. (C) The PCA analysis demonstrated that the patients in the different ARG\_score groups were distributed in two directions. (D, E) The ranked dot plot indicates the ARG\_score distribution and scatter plot presenting the patients' survival status. (F) Expression patterns of 9 selected prognostic genes in high- and low-ARG\_score groups.

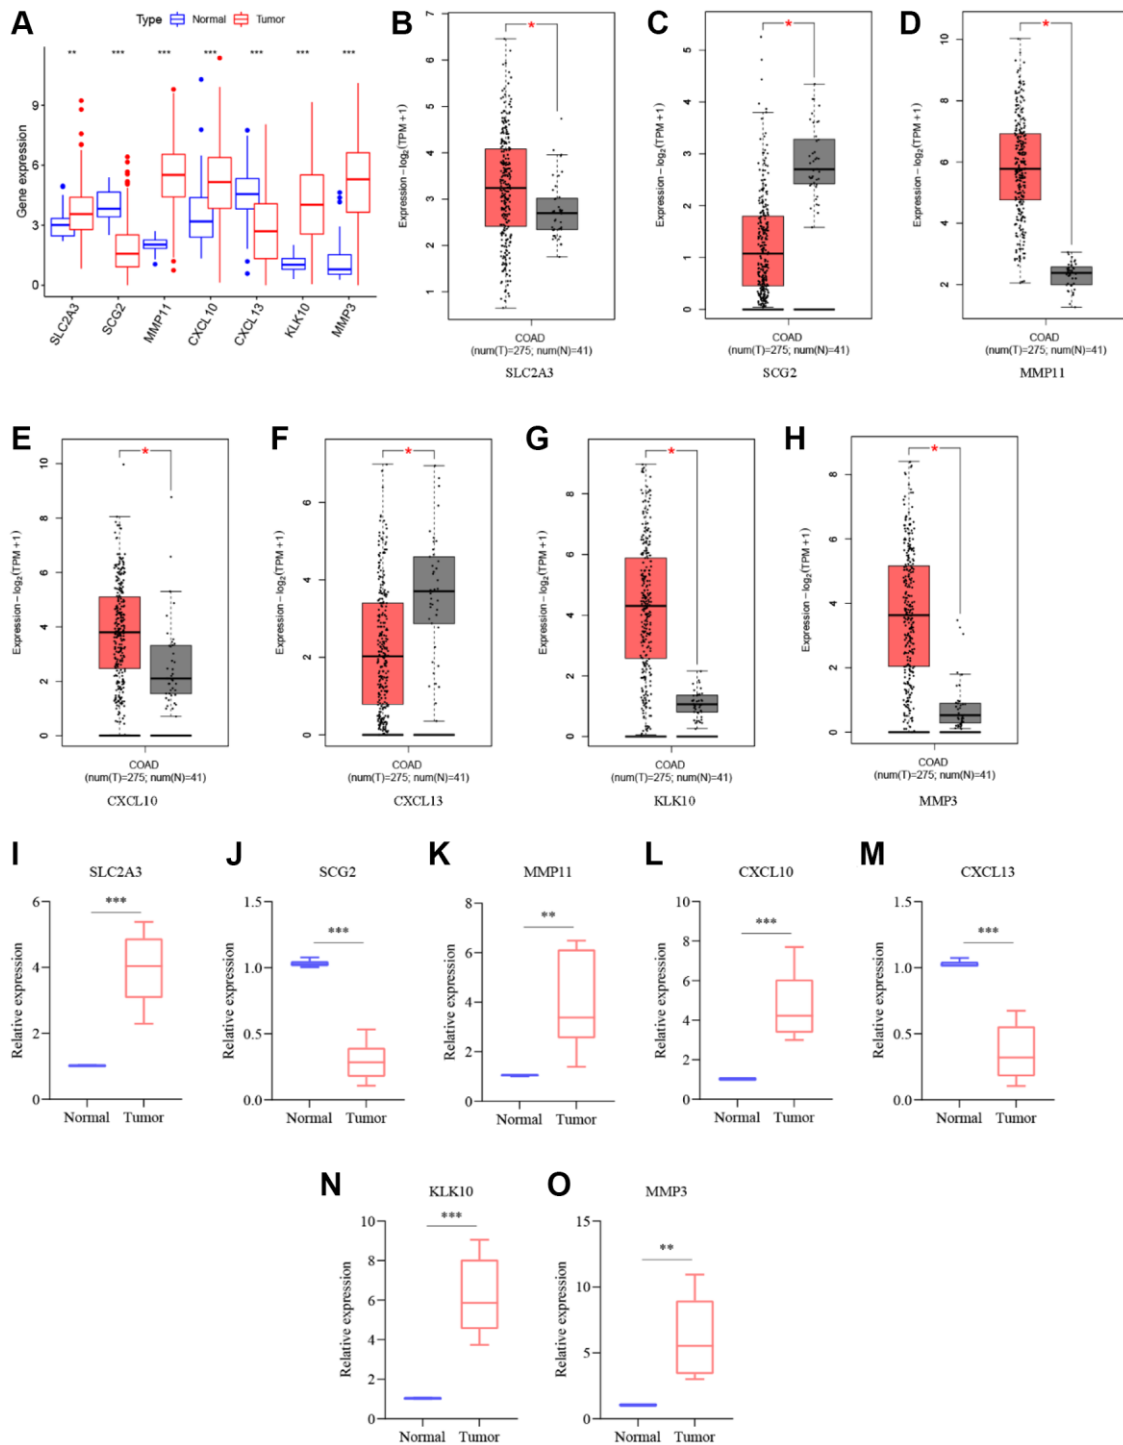

**Supplementary Figure 6. Expression levels of 9 selected angiogenesis-related prognostic genes in CRC tissues and corresponding normal tissues. (A)** Expression of 9 prognostic genes in CRC tissues and normal human colon tissues (TCGA cohort). **(B–H)** Expression of 9 prognostic genes in CRC tissues and normal human colon tissues (GEPIA 2 cohort). **(I–O)** Expression levels of 9 prognostic genes in CRC tissues and corresponding normal tissues by RT-PCR. \* $P < 0.05$ ; \*\* $P < 0.01$ ; \*\*\* $P < 0.001$ .

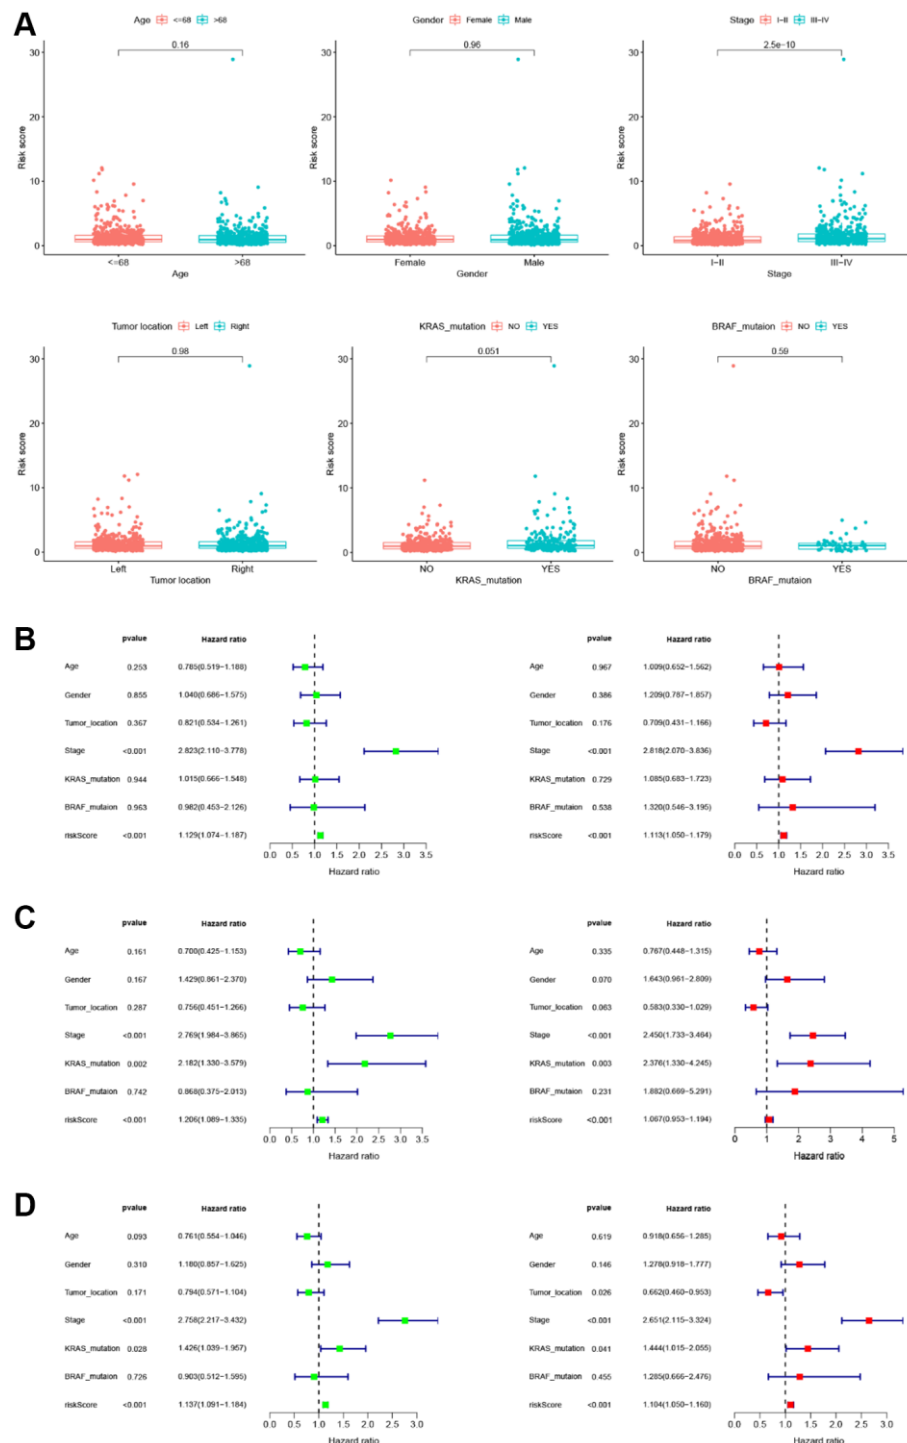

**Supplementary Figure 7. The correlation and independent prognosis analysis of ARG\_score and clinicopathological variables in CRC. (A)** The correlation between the ARG\_score and clinical characteristics, including age, gender, TNM stage, tumor location, KRAS mutation status, and BRAF mutation status. **(B)** Univariate and multivariate analyses showed the prognostic value of the ARG\_score in the training cohort. **(C)** Univariate and multivariate analyses showed the prognostic value of the ARG\_score in the testing cohort. **(D)** Univariate and multivariate analyses showed the prognostic value of the ARG\_score in the entire cohort.

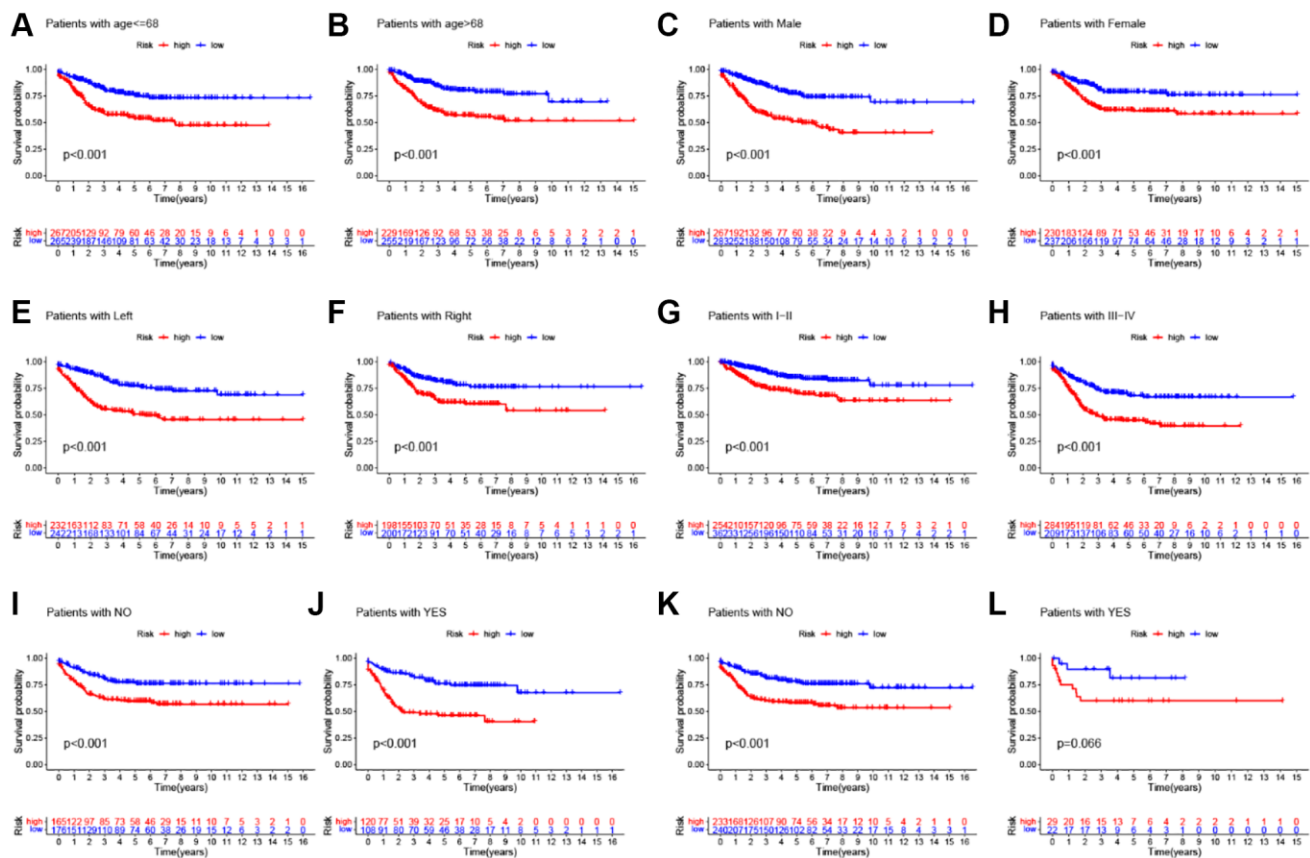

**Supplementary Figure 8. Stratification analysis of the ARG\_score in CRC.** (A, B) Age (age  $\leq 68$  and age  $> 68$  years old). (C, D) Gender (female and male). (E, F) Tumor location (left-side or right-side). (G, H) Tumor stage (I-II or III-IV). (I, J) KRAS mutation (yes and no). (K, L) BRAF mutation (yes and no).
