# Supplementary material for: Construction and validation of a novel angiogenesis pattern to predict prognosis and immunotherapy efficacy in colorectal cancer
Source: publisher site journal article supplement (doi:10.18632/aging.205189), 2023-11-07
Supplement: Supplementary file [file aging-v15i21-205189-supplementary-material-SD2.pdf]

## SUPPLEMENTARY TABLES

Please browse Full Text version to see the data of Supplementary Tables 3, 5 and 6.

**Supplementary Table 1. Summary of 36 recognized ARGs.**

| <b>Gene</b> | <b>Type</b>  |
|-------------|--------------|
| VCAN        | Angiogenesis |
| POSTN       | Angiogenesis |
| FSTL1       | Angiogenesis |
| LRPAP1      | Angiogenesis |
| STC1        | Angiogenesis |
| LPL         | Angiogenesis |
| VEGFA       | Angiogenesis |
| PF4         | Angiogenesis |
| THBD        | Angiogenesis |
| FGFR1       | Angiogenesis |
| TNFRSF21    | Angiogenesis |
| CCND2       | Angiogenesis |
| COL5A2      | Angiogenesis |
| ITGAV       | Angiogenesis |
| SERPINA5    | Angiogenesis |
| KCNJ8       | Angiogenesis |
| APP         | Angiogenesis |
| JAG1        | Angiogenesis |
| COL3A1      | Angiogenesis |
| SPP1        | Angiogenesis |
| NRP1        | Angiogenesis |
| OLR1        | Angiogenesis |
| PDGFA       | Angiogenesis |
| PTK2        | Angiogenesis |
| SLCO2A1     | Angiogenesis |
| PGLYRP1     | Angiogenesis |
| VAV2        | Angiogenesis |
| S100A4      | Angiogenesis |
| MSX1        | Angiogenesis |
| VTN         | Angiogenesis |
| TIMP1       | Angiogenesis |
| APOH        | Angiogenesis |
| PRG2        | Angiogenesis |
| JAG2        | Angiogenesis |
| LUM         | Angiogenesis |
| CXCL6       | Angiogenesis |

**Supplementary Table 2. The primer sequences for qRT-PCR.**

| Gene           | Primer Sequence                                                      |
|----------------|----------------------------------------------------------------------|
| CXCL13         | F: 5'-GGTCAGCAGCCTCTCTCCAGTC-3'<br>R: 5'-TTGAATTCGATCAATGAAGCGT-3'   |
| SLC2A3         | F: 5'-GAAGAGGAGAATGCTAAG-3'<br>R: 5'-CAATGGAAATGATGATGG-3'           |
| CXCL10         | F: 5'-GTGGCATTCAAGGAGTACCTC-3'<br>R: 5'-GCCTTCGATTCTGGATTCAGACA-3'   |
| KDR            | F: 5'-CTACTGATTTTTTGCCCTTGTTTC-3'<br>R: 5'-TAGTCATTGTTCCCAGCATTTC-3' |
| KLK10          | F: 5'-TCTACCCTGGCGTGGTCACC-3'<br>R: 5'-GCAGAGCCACAGGGGTAAACAC-3'     |
| MMP11          | F: 5'-AAGAGGTTTCGTGCTTTCTGG-3'<br>R: 5'-CCATGGGAACCGAAGGAT-3'        |
| MMP3           | F: 5'-CCTGCTTTGTCCTTTGATGC-3'<br>R: 5'-TGAGTCAATCCCTGGAAAGTC-3'      |
| SCG2           | F: 5'-ACCAGACCTCAGGTTGGAAAA-3'<br>R: 5'-ACCAGACCTCAGGTTGGAAAA-3'     |
| SPINK1         | F: 5'-TGTCTGTGGACTGATGGAA-3'<br>R: 5'-GCCCAGATTTTTGAATGAGG-3'        |
| $\beta$ -actin | F: 5'-GCATGGAGTCCTGTGGCAT-3'<br>R: 5'-CTAGAAGCATTTCGCGGTGG-3'        |
| siKLK10#1      | 5'-CCTCCACACCTCTAAACATCTC-3'                                         |
| siKLK10#2      | 5'-TTGTTGTACTTCACTCTCCGG-3'                                          |
| siKLK10-NC     | 5'-UUCUCCGAACGUGUCACGUTT-3'                                          |

**Supplementary Table 3. Clinical information of 1109 colorectal cancer patients.****Supplementary Table 4. The prognostic values of 36 ARGs in patients with CRC.**

| id       | HR          | HR.95L      | HR.95H      | P-value     | km          |
|----------|-------------|-------------|-------------|-------------|-------------|
| VCAN     | 1.224994274 | 1.11397604  | 1.347076523 | 2.83E-05    | 1.19E-06    |
| POSTN    | 1.181163635 | 1.081386881 | 1.29014653  | 0.000217649 | 1.66E-06    |
| FSTL1    | 1.273841191 | 1.118843592 | 1.450311189 | 0.0002558   | 5.61E-06    |
| LRPAP1   | 0.67653805  | 0.510799323 | 0.896053914 | 0.006421073 | 0.000186841 |
| STC1     | 1.201646156 | 1.066394221 | 1.354052241 | 0.002568988 | 0.000953075 |
| LPL      | 1.19409106  | 1.094679196 | 1.302530881 | 6.34E-05    | 2.38E-05    |
| VEGFA    | 1.466477431 | 1.219837129 | 1.762986225 | 4.60E-05    | 2.23E-06    |
| PF4      | 0.947950341 | 0.865382536 | 1.038396098 | 0.250296529 | 0.048438335 |
| THBD     | 1.222489097 | 1.040031194 | 1.436956507 | 0.01485467  | 0.005430823 |
| FGFR1    | 1.31569863  | 1.108971297 | 1.56096275  | 0.001655545 | 0.000456971 |
| TNFRSF21 | 1.165541157 | 0.937967838 | 1.448329178 | 0.166925139 | 0.008317478 |
| CCND2    | 0.905160617 | 0.809083578 | 1.012646611 | 0.081779674 | 0.000854507 |
| COL5A2   | 1.237035349 | 1.121895833 | 1.363991568 | 1.98E-05    | 5.01E-07    |

|          |             |             |             |             |             |
|----------|-------------|-------------|-------------|-------------|-------------|
| ITGAV    | 1.249982819 | 1.078549708 | 1.448664847 | 0.00303005  | 0.003795799 |
| SERPINA5 | 1.197708641 | 1.027155793 | 1.396580732 | 0.021345418 | 0.001044201 |
| KCNJ8    | 1.389973359 | 1.213983433 | 1.591476364 | 1.87E-06    | 1.27E-08    |
| APP      | 1.062376145 | 0.833601656 | 1.353935739 | 0.624820263 | 0.078671415 |
| JAG1     | 1.016142325 | 0.838207208 | 1.231849612 | 0.870487009 | 0.030863117 |
| COL3A1   | 1.241335579 | 1.121609276 | 1.373842079 | 2.94E-05    | 1.20E-07    |
| SPP1     | 1.116360262 | 1.047764384 | 1.189447029 | 0.000668835 | 7.87E-05    |
| NRP1     | 1.317014905 | 1.13423922  | 1.529243769 | 0.000303391 | 2.38E-05    |
| OLR1     | 1.17399583  | 1.078246613 | 1.278247659 | 0.000219433 | 0.00037697  |
| PDGFA    | 0.913533642 | 0.77915275  | 1.071091278 | 0.265285904 | 0.110789116 |
| PTK2     | 1.307826879 | 1.020229861 | 1.676495868 | 0.034172484 | 0.009839317 |
| SLCO2A1  | 1.076135281 | 0.939249225 | 1.232971093 | 0.290480775 | 0.053553315 |
| PGLYRP1  | 0.916923323 | 0.703850283 | 1.194498888 | 0.52036185  | 0.141275291 |
| VAV2     | 1.139619561 | 0.966985174 | 1.343074102 | 0.118902964 | 0.008376223 |
| S100A4   | 1.198276931 | 1.084160975 | 1.324404436 | 0.00039635  | 7.44E-05    |
| MSX1     | 0.959960251 | 0.833859773 | 1.105130278 | 0.569546779 | 0.069710173 |
| TIMP1    | 1.390530524 | 1.186145976 | 1.630132527 | 4.81E-05    | 2.03E-05    |
| APOH     | 0.978210944 | 0.820736312 | 1.165900225 | 0.805686095 | 0.116002365 |
| PRG2     | 0.982731271 | 0.71948208  | 1.342299939 | 0.912807991 | 0.133462913 |
| JAG2     | 1.088750856 | 0.937652326 | 1.264198246 | 0.26465296  | 0.009779996 |
| LUM      | 1.140747631 | 1.03752703  | 1.254237354 | 0.006503175 | 0.001225002 |
| CXCL6    | 0.942957149 | 0.863324081 | 1.029935575 | 0.191984201 | 0.002126871 |

**Supplementary Table 5. Spearman correlation analysis of the 36 ARGs.**

**Supplementary Table 6. Prognostic analysis of 620 subtype-related genes using a univariate Cox regression model.**
