# Supplementary material for: Construction and validation of a novel angiogenesis pattern to predict prognosis and immunotherapy efficacy in colorectal cancer
Source: Aging (Albany NY). 2023 Nov 7;15(21):12413–50. doi: 10.18632/aging.205189 (PMC10683615; doi:10.18632/aging.205189)
Supplement: Supplementary Tables 3, 5 and 6 [file aging-15-205189-s003.xlsx]

## Sheet: Supplementary Table 3
Supplementary Table 3. Clinical information of 1109 colorectal cancer patients.
Id	futime	fustat	Age	Gender	Tumor location	Grade	Stage	T_stage	N_stage	M_stage	KRAS_mutation	BRAF_mutaion	Dataset	Chemotherapy.Adjuvant
GSE39582_GSM971957	0	1	34.5	Male	Left-side	unknow	4	T4	N2	M1	YES	Normal	GSE39582	NO
GSE39582_GSM972401	0	0	69	Male	Right-side	unknow	2	T3	N0	M0	YES	Normal	GSE39582	NO
GSE39582_GSM972402	0	1	71	Male	Right-side	unknow	2	T3	N0	M1	YES	Normal	GSE39582	YES
GSE39582_GSM972437	0	1	48	Female	Left-side	unknow	4	T3	N2	M1	NO	Normal	GSE39582	unknow
GSE39582_GSM972438	0	1	44	Male	Right-side	unknow	4	T4	N1	M1	NO	Normal	GSE39582	unknow
GSE39582_GSM972439	0	1	65	Male	Left-side	unknow	4	T3	N1	M1	NO	Normal	GSE39582	unknow
GSE39582_GSM972441	0	1	49	Female	Left-side	unknow	4	T4	N2	M1	NO	Normal	GSE39582	unknow
GSE39582_GSM972442	0	1	54	Female	Left-side	unknow	4	T3	N2	M1	YES	Normal	GSE39582	unknow
GSE39582_GSM972456	0	0	82	Female	Left-side	unknow	2	T3	N0	M0	NO	Normal	GSE39582	NO
GSE39582_GSM971958	0	1	36.4	Female	Left-side	unknow	4	T3	N2	M1	NO	Normal	GSE39582	NO
GSE39582_GSM972003	0	1	64.6	Male	Right-side	unknow	4	T3	N2	M1	YES	Normal	GSE39582	YES
GSE39582_GSM972005	0	1	66.1	Male	Right-side	unknow	4	T4	N1	M1	YES	Normal	GSE39582	NO
GSE39582_GSM972006	0	1	67.5	Female	Left-side	unknow	4	T3	N0	M1	NO	Normal	GSE39582	YES
GSE39582_GSM972009	0	1	68.1	Male	Left-side	unknow	4	T3	N2	M1	YES	Normal	GSE39582	NO
GSE39582_GSM972014	0	1	65.8	Male	Left-side	unknow	4	T3	N0	M1	NO	Normal	GSE39582	YES
GSE39582_GSM972039	0	1	65	Male	Left-side	unknow	4	T4	N0	M1	NO	Normal	GSE39582	YES
GSE39582_GSM972043	0	1	56	Male	Left-side	unknow	4	T3	N0	M1	NO	Normal	GSE39582	YES
GSE39582_GSM972045	0	1	71	Male	Right-side	unknow	4	T3	N0	M1	YES	Normal	GSE39582	YES
GSE39582_GSM972048	0	1	50	Female	Left-side	unknow	4	T4	N0	M1	YES	Normal	GSE39582	YES
GSE39582_GSM972051	0	1	34	Female	Left-side	unknow	4	T3	N0	M1	YES	Normal	GSE39582	YES
GSE39582_GSM972062	0	1	43	Female	Left-side	unknow	2	T4	N0	M0	YES	Normal	GSE39582	YES
GSE39582_GSM972064	0	1	60	Male	Left-side	unknow	4	T4	N0	M1	YES	Normal	GSE39582	YES
GSE39582_GSM972066	0	1	69	Male	Left-side	unknow	4	T4	N0	M1	NO	Normal	GSE39582	YES
GSE39582_GSM972206	0	1	74	Male	Left-side	unknow	2	unknow	unknow	unknow	YES	Normal	GSE39582	NO
GSE39582_GSM972208	0	1	63	Male	Left-side	unknow	4	T4	N2	M1	NO	Normal	GSE39582	unknow
GSE39582_GSM972209	0	1	54	Male	Right-side	unknow	4	T3	N2	M1	NO	Abnormal	GSE39582	unknow
GSE39582_GSM972210	0	1	50	Male	Left-side	unknow	4	T3	unknow	M1	NO	Normal	GSE39582	unknow
GSE39582_GSM972212	0	1	54	Female	Left-side	unknow	4	T3	N1	M1	YES	Normal	GSE39582	unknow
GSE39582_GSM972213	0	1	71	Female	Left-side	unknow	4	T3	N0	M1	YES	Normal	GSE39582	unknow
GSE39582_GSM972214	0	1	88	Female	Right-side	unknow	4	T3	N2	M1	NO	Abnormal	GSE39582	unknow
GSE39582_GSM972216	0	1	45	Female	Left-side	unknow	4	T3	N2	M1	NO	Normal	GSE39582	unknow
GSE39582_GSM972217	0	1	73	Male	Left-side	unknow	4	T3	N1	M1	YES	Normal	GSE39582	unknow
GSE39582_GSM972218	0	1	75	Female	Right-side	unknow	4	T4	N3	M1	YES	Normal	GSE39582	unknow
GSE39582_GSM972219	0	1	60	Male	Left-side	unknow	4	T3	N2	M1	YES	Normal	GSE39582	unknow
GSE39582_GSM972229	0	0	81	Female	Left-side	unknow	2	T3	N0	M0	YES	Normal	GSE39582	NO
GSE39582_GSM972245	0	0	77	Male	Left-side	unknow	4	T4	N1	M1	YES	Normal	GSE39582	NO
GSE39582_GSM972246	0	0	92	Female	Left-side	unknow	3	T3	N1	M0	NO	Normal	GSE39582	NO
GSE39582_GSM972258	0	0	77	Female	Left-side	unknow	2	T4	N0	M0	NO	Normal	GSE39582	NO
GSE38832_GSM950449	9	0	unknow	unknow	unknow	unknow	3	unknow	unknow	unknow	unknow	unknow	GSE38832	unknow
GSE38832_GSM950417	12.9	0	unknow	unknow	unknow	unknow	2	unknow	unknow	unknow	unknow	unknow	GSE38832	unknow
GSE17536_GSM437224	27.6	0	54	male	unknow	2	3	unknow	unknow	unknow	unknow	unknow	GSE17536	unknow
GSE39582_GSM972497	30	0	77	Female	Left-side	unknow	3	T2	N1	M0	unknow	Normal	GSE39582	NO
GSE39582_GSM971961	30	1	39.2	Female	Left-side	unknow	4	T3	N1	M1	NO	Normal	GSE39582	YES
GSE39582_GSM971999	30	0	61.5	Male	Left-side	unknow	3	T3	N1	M0	NO	Normal	GSE39582	NO
GSE39582_GSM972038	30	0	61	Male	Left-side	unknow	2	T3	N0	M0	NO	Normal	GSE39582	NO
GSE39582_GSM972074	30	1	70	Female	Left-side	unknow	2	T4	N0	M0	NO	Normal	GSE39582	YES
GSE39582_GSM972220	30	0	81	Male	Right-side	unknow	3	T3	N1	M0	NO	Abnormal	GSE39582	NO
GSE39582_GSM972228	30	0	68	Male	Right-side	unknow	2	T3	N0	M0	NO	Abnormal	GSE39582	NO
TCGA_TCGA-F4-6809	39	0	52	Female	Left-side	unknow	4	T3	N1	M1	unknow	unknow	TCGA	unknow
TCGA_TCGA-AD-6899	48	0	84	Male	Right-side	unknow	3	T4	N2	unknow	unknow	unknow	TCGA	unknow
TCGA_TCGA-AA-3511	59	1	64	Male	Left-side	unknow	2	T4	N0	M0	unknow	unknow	TCGA	unknow
GSE39582_GSM972436	60	1	81	Male	Left-side	unknow	2	unknow	unknow	unknow	YES	Normal	GSE39582	NO
GSE39582_GSM972007	60	0	71	Male	Right-side	unknow	4	T4	N2	M1	NO	Abnormal	GSE39582	NO
GSE39582_GSM972008	60	1	67.3	Male	Left-side	unknow	4	T4	N2	M1	NO	Abnormal	GSE39582	NO
GSE39582_GSM972116	60	1	79	Female	Left-side	unknow	3	T3	N2	M0	NO	Normal	GSE39582	YES
GSE39582_GSM972142	60	1	86	Female	Right-side	unknow	3	T3	N2	M0	YES	Normal	GSE39582	NO
GSE39582_GSM972243	60	0	66	Male	Left-side	unknow	2	T3	N0	M0	YES	Normal	GSE39582	NO
GSE39582_GSM972285	60	0	71	Male	Left-side	unknow	2	T2	N0	M0	NO	Normal	GSE39582	NO
TCGA_TCGA-AA-A024	61	0	81	Male	Left-side	unknow	2	T3	N0	M0	unknow	unknow	TCGA	unknow
GSE17536_GSM437171	67.8	0	40	female	unknow	1	2	unknow	unknow	unknow	unknow	unknow	GSE17536	unknow
TCGA_TCGA-DM-A1D7	80	1	82	Male	Left-side	unknow	2	T3	N0	M0	NO	Normal	TCGA	unknow
TCGA_TCGA-T9-A92H	81	1	82	Male	Left-side	unknow	2	T3	N0	M0	unknow	unknow	TCGA	unknow
GSE39582_GSM972433	90	1	85	Male	Left-side	unknow	3	unknow	unknow	unknow	NO	Normal	GSE39582	NO
GSE39582_GSM972479	90	0	79	Male	Right-side	unknow	3	T4	N2	M0	YES	Normal	GSE39582	NO
GSE39582_GSM972068	90	1	44	Male	Left-side	unknow	2	T4	N0	M0	YES	Normal	GSE39582	YES
GSE39582_GSM972096	90	1	63	Female	Left-side	unknow	3	T2	N1	M0	NO	Normal	GSE39582	YES
GSE39582_GSM972154	90	1	49	Female	Left-side	unknow	3	T4	N2	M0	YES	unknow	GSE39582	YES
GSE39582_GSM972164	90	1	70	Male	Left-side	unknow	3	T3	unknow	M0	NO	unknow	GSE39582	YES
GSE39582_GSM972166	90	1	42	Female	Left-side	unknow	3	T3	unknow	M0	YES	unknow	GSE39582	YES
GSE39582_GSM972275	90	1	76	Male	Right-side	unknow	2	T4	N0	M0	NO	Abnormal	GSE39582	NO
TCGA_TCGA-AA-3555	91	1	81	Female	Right-side	unknow	2	T3	N0	M0	unknow	unknow	TCGA	unknow
GSE17536_GSM437197	99.6	1	83	female	unknow	2	3	unknow	unknow	unknow	unknow	unknow	GSE17536	unknow
GSE38832_GSM950428	107.1	0	unknow	unknow	unknow	unknow	1	unknow	unknow	unknow	unknow	unknow	GSE38832	unknow
GSE17536_GSM437114	109.2	0	78	male	unknow	2	1	unknow	unknow	unknow	unknow	unknow	GSE17536	unknow
GSE38832_GSM950468	114.9	0	unknow	unknow	unknow	unknow	2	unknow	unknow	unknow	unknow	unknow	GSE38832	unknow
GSE38832_GSM950421	116.1	1	unknow	unknow	unknow	unknow	3	unknow	unknow	unknow	unknow	unknow	GSE38832	unknow
GSE39582_GSM972512	120	1	62	Male	Right-side	unknow	3	T4	N2	M0	YES	Normal	GSE39582	YES
GSE39582_GSM971959	120	1	36.9	Male	Right-side	unknow	2	T4	N0	M0	NO	Normal	GSE39582	NO
GSE39582_GSM972110	120	1	76	Male	Right-side	unknow	3	T4	N2	M0	unknow	unknow	GSE39582	YES
GSE39582_GSM972135	120	1	78	Female	Left-side	unknow	2	T3	N0	M0	YES	unknow	GSE39582	NO
GSE39582_GSM972168	120	1	76	Male	Right-side	unknow	3	T4	unknow	M0	NO	unknow	GSE39582	NO
GSE39582_GSM972172	120	1	88	Female	Right-side	unknow	2	T4	N0	M0	YES	Normal	GSE39582	NO
GSE39582_GSM972184	120	1	70	Female	Right-side	unknow	2	unknow	unknow	unknow	NO	Abnormal	GSE39582	NO
GSE39582_GSM972204	120	1	78	Male	Left-side	unknow	2	unknow	unknow	unknow	NO	Normal	GSE39582	YES
TCGA_TCGA-AA-3552	122	1	85	Male	Right-side	unknow	3	T3	N2	M0	unknow	unknow	TCGA	unknow
TCGA_TCGA-D5-6537	123	1	64	Male	Right-side	unknow	3	T3	N1	unknow	unknow	unknow	TCGA	unknow
GSE17536_GSM437218	127.2	0	78	female	unknow	2	3	unknow	unknow	unknow	unknow	unknow	GSE17536	unknow
GSE38832_GSM950497	129.9	0	unknow	unknow	unknow	unknow	2	unknow	unknow	unknow	unknow	unknow	GSE38832	unknow
TCGA_TCGA-4N-A93T	146	0	67	Male	Right-side	unknow	3	T4	N1	M0	unknow	unknow	TCGA	unknow
GSE39582_GSM972412	150	1	78	Male	Right-side	unknow	3	T3	N2	M0	NO	unknow	GSE39582	YES
GSE39582_GSM972416	150	1	49	Male	Left-side	unknow	2	T4	N0	M0	YES	Normal	GSE39582	YES
GSE39582_GSM972444	150	1	73	Male	Right-side	unknow	3	T4	N2	unknow	YES	Normal	GSE39582	YES
GSE39582_GSM971984	150	1	68	Female	Right-side	unknow	2	T4	N0	M0	NO	Abnormal	GSE39582	NO
GSE39582_GSM972021	150	1	58	Female	Left-side	unknow	3	T3	N2	M0	NO	Normal	GSE39582	YES
GSE39582_GSM972255	150	0	81	Female	Right-side	unknow	2	T3	N0	M0	NO	Normal	GSE39582	NO
GSE39582_GSM972262	150	0	88	Female	Left-side	unknow	2	T4	N0	unknow	NO	Abnormal	GSE39582	unknow
GSE39582_GSM972317	150	1	85	Male	Right-side	unknow	2	T3	N0	M0	NO	Abnormal	GSE39582	NO
GSE39582_GSM972349	150	0	79	Female	Right-side	unknow	3	T4	N1	M0	YES	Normal	GSE39582	YES
GSE39582_GSM972393	150	1	76	Male	Right-side	unknow	2	T3	N0	M0	YES	Normal	GSE39582	NO
TCGA_TCGA-AA-3715	153	1	77	Male	Right-side	unknow	2	T3	N0	M0	unknow	unknow	TCGA	unknow
GSE17536_GSM437230	156.6	0	62	female	unknow	2	3	unknow	unknow	unknow	unknow	unknow	GSE17536	unknow
GSE17536_GSM437184	160.5	1	74	male	unknow	3	3	unknow	unknow	unknow	unknow	unknow	GSE17536	unknow
TCGA_TCGA-NH-A8F8	167	0	79	Male	Right-side	unknow	4	T4	N2	M1	YES	unknow	TCGA	unknow
GSE39582_GSM972420	180	1	83	Male	Right-side	unknow	3	T3	N2	M0	NO	Abnormal	GSE39582	NO
GSE39582_GSM972023	180	1	59	Female	Left-side	unknow	3	T3	N1	M0	YES	Normal	GSE39582	YES
GSE39582_GSM972155	180	1	42	Male	Left-side	unknow	3	T3	N2	M0	YES	unknow	GSE39582	YES
GSE39582_GSM972247	180	0	79	Male	Left-side	unknow	2	T4	N0	M0	NO	Normal	GSE39582	NO
GSE39582_GSM972380	180	1	64	Female	Right-side	unknow	3	T3	N2	M0	YES	Normal	GSE39582	YES
GSE39582_GSM972390	180	1	87	Male	Right-side	unknow	3	T3	N1	M0	YES	Normal	GSE39582	NO
GSE39582_GSM972394	180	1	81	Male	Left-side	unknow	3	T3	N1	M0	YES	Normal	GSE39582	NO
TCGA_TCGA-AA-3681	182	0	77	Female	Right-side	unknow	3	T3	N1	M0	unknow	unknow	TCGA	unknow
TCGA_TCGA-AA-3662	184	0	80	Female	Left-side	unknow	4	T4	N2	M1	unknow	unknow	TCGA	unknow
TCGA_TCGA-AY-4070	186	1	50	Female	Right-side	unknow	3	T3	N2	M0	NO	unknow	TCGA	unknow
TCGA_TCGA-CA-6718	207	1	46	Male	Right-side	unknow	2	T3	N0	M0	unknow	unknow	TCGA	unknow
GSE39582_GSM971985	210	0	66.6	Male	Right-side	unknow	0	T1	N0	M0	YES	Normal	GSE39582	NO
GSE39582_GSM972134	210	1	74	Male	Left-side	unknow	3	T3	N2	M0	NO	unknow	GSE39582	NO
GSE39582_GSM972205	210	1	76	Male	Left-side	unknow	2	unknow	unknow	unknow	NO	Normal	GSE39582	NO
GSE39582_GSM972235	210	0	57	Female	Left-side	unknow	3	T2	N1	M0	YES	Normal	GSE39582	YES
GSE39582_GSM972251	210	0	57	Male	Left-side	unknow	4	T4	N1	M1	YES	Normal	GSE39582	YES
GSE39582_GSM972261	210	0	79	Female	Right-side	unknow	3	T4	N1	M0	NO	Abnormal	GSE39582	NO
GSE39582_GSM972347	210	0	73	Female	Left-side	unknow	2	T3	N0	M0	NO	Normal	GSE39582	NO
TCGA_TCGA-AA-3663	212	0	42	Male	Right-side	unknow	2	T3	N0	M0	unknow	unknow	TCGA	unknow
TCGA_TCGA-5M-AAT6	219	1	40	Female	Right-side	unknow	4	T1	N2	M1	unknow	unknow	TCGA	unknow
GSE38832_GSM950463	221.1	0	unknow	unknow	unknow	unknow	3	unknow	unknow	unknow	unknow	unknow	GSE38832	unknow
TCGA_TCGA-DM-A1DA	228	0	71	Female	Right-side	unknow	3	T3	N2	M0	NO	Normal	TCGA	unknow
TCGA_TCGA-D5-6898	229	0	51	Female	Left-side	unknow	1	T2	N0	M0	unknow	unknow	TCGA	unknow
GSE38832_GSM950521	234.9	0	unknow	unknow	unknow	unknow	3	unknow	unknow	unknow	unknow	unknow	GSE38832	unknow
TCGA_TCGA-DM-A280	236	0	70	Female	Right-side	unknow	2	T3	N0	M0	YES	Normal	TCGA	unknow
GSE39582_GSM972400	240	1	67.8	Female	Left-side	unknow	4	T4	N2	M1	YES	Normal	GSE39582	YES
GSE39582_GSM972415	240	1	69	Male	Left-side	unknow	3	T3	N1	M0	YES	unknow	GSE39582	YES
GSE39582_GSM972087	240	1	84	Female	Right-side	unknow	2	T3	N0	M0	NO	Normal	GSE39582	NO
TCGA_TCGA-AA-3980	242	0	89	Female	Left-side	unknow	1	T2	N0	M0	unknow	unknow	TCGA	unknow
GSE17536_GSM437176	246.3	1	38	male	unknow	2	3	unknow	unknow	unknow	unknow	unknow	GSE17536	unknow
GSE38832_GSM950506	252.9	0	unknow	unknow	unknow	unknow	2	unknow	unknow	unknow	unknow	unknow	GSE38832	unknow
TCGA_TCGA-G4-6295	254	0	70	Female	Right-side	unknow	2	T3	N0	M0	unknow	unknow	TCGA	unknow
TCGA_TCGA-RU-A8FL	256	1	51	Male	Right-side	unknow	3	T3	N2	unknow	NO	unknow	TCGA	unknow
TCGA_TCGA-A6-A566	257	1	55	Female	Left-side	unknow	3	T4	N1	M0	NO	unknow	TCGA	unknow
GSE17536_GSM437211	257.4	1	51	female	unknow	3	3	unknow	unknow	unknow	unknow	unknow	GSE17536	unknow
GSE17536_GSM437265	268.2	0	76	male	unknow	2	4	unknow	unknow	unknow	unknow	unknow	GSE17536	unknow
GSE39582_GSM972474	270	1	49	Female	Left-side	unknow	3	T3	N1	M0	NO	Normal	GSE39582	YES
GSE39582_GSM972000	270	1	76.4	Female	Left-side	unknow	3	T3	N2	M0	NO	Normal	GSE39582	YES
GSE39582_GSM972020	270	1	49	Female	Left-side	unknow	3	T3	N2	M0	NO	Normal	GSE39582	YES
GSE39582_GSM972106	270	1	96	Female	Left-side	unknow	3	T3	N1	M0	unknow	unknow	GSE39582	YES
GSE39582_GSM972137	270	1	68	Male	Left-side	unknow	2	T3	N0	M0	NO	unknow	GSE39582	YES
GSE39582_GSM972161	270	1	91	Female	Left-side	unknow	2	T3	N0	M0	YES	unknow	GSE39582	NO
GSE39582_GSM972187	270	1	62	Male	Right-side	unknow	2	T3	N0	M0	NO	Normal	GSE39582	NO
GSE39582_GSM972254	270	1	77	Female	Left-side	unknow	4	T3	N0	M1	NO	Normal	GSE39582	YES
GSE39582_GSM972257	270	1	88	Female	Left-side	unknow	2	T4	N0	M0	YES	Normal	GSE39582	NO
GSE39582_GSM972298	270	0	83	Female	Right-side	unknow	2	T3	N0	M0	unknow	unknow	GSE39582	NO
GSE39582_GSM972321	270	0	52	Male	Left-side	unknow	3	T3	N2	M0	NO	Normal	GSE39582	NO
GSE17536_GSM437127	271.5	1	58	female	unknow	3	2	unknow	unknow	unknow	unknow	unknow	GSE17536	unknow
TCGA_TCGA-D5-6926	275	0	65	Male	Left-side	unknow	3	T4	N1	M0	unknow	unknow	TCGA	unknow
GSE38832_GSM950495	276	0	unknow	unknow	unknow	unknow	2	unknow	unknow	unknow	unknow	unknow	GSE38832	unknow
TCGA_TCGA-AA-3519	276	0	63	Male	Left-side	unknow	3	T3	N1	M0	unknow	unknow	TCGA	unknow
TCGA_TCGA-NH-A50U	276	1	42	Male	Right-side	unknow	4	T4	N0	M1	YES	unknow	TCGA	unknow
GSE17536_GSM437188	286.8	1	75	male	unknow	2	3	unknow	unknow	unknow	unknow	unknow	GSE17536	unknow
GSE38832_GSM950507	288	0	unknow	unknow	unknow	unknow	2	unknow	unknow	unknow	unknow	unknow	GSE38832	unknow
TCGA_TCGA-F4-6461	288	1	41	Female	Right-side	unknow	3	T4	N2	M0	unknow	unknow	TCGA	unknow
GSE38832_GSM950457	291.9	1	unknow	unknow	unknow	unknow	3	unknow	unknow	unknow	unknow	unknow	GSE38832	unknow
TCGA_TCGA-CK-5916	292	1	71	Female	Right-side	unknow	1	T1	N0	M0	unknow	unknow	TCGA	unknow
TCGA_TCGA-A6-A5ZU	293	0	59	Male	Right-side	unknow	3	T3	N1	M0	unknow	unknow	TCGA	unknow
GSE17536_GSM437264	298.8	0	82	female	unknow	2	4	unknow	unknow	unknow	unknow	unknow	GSE17536	unknow
GSE39582_GSM972010	300	1	74.5	Male	Left-side	unknow	4	T3	N1	M1	YES	Normal	GSE39582	NO
GSE39582_GSM972234	300	0	79	Male	Right-side	unknow	4	T3	N1	M1	NO	Normal	GSE39582	YES
GSE39582_GSM972291	300	1	46	Male	Left-side	unknow	3	T4	N2	M0	YES	Normal	GSE39582	YES
GSE39582_GSM972320	300	1	64	Male	Left-side	unknow	3	T2	N1	M0	YES	Normal	GSE39582	NO
TCGA_TCGA-AZ-5403	304	1	43	Male	Left-side	unknow	2	T3	N0	unknow	unknow	unknow	TCGA	unknow
TCGA_TCGA-AA-A02K	306	1	50	Male	Right-side	unknow	4	T4	N2	M1	unknow	unknow	TCGA	unknow
TCGA_TCGA-CM-6679	306	0	58	Male	Left-side	unknow	2	T3	N0	M0	unknow	unknow	TCGA	unknow
TCGA_TCGA-D5-6922	308	0	76	Male	Left-side	unknow	3	T3	N1	M0	unknow	unknow	TCGA	unknow
TCGA_TCGA-D5-7000	312	0	79	Female	Right-side	unknow	1	T2	N0	M0	unknow	unknow	TCGA	unknow
GSE38832_GSM950504	315.9	1	unknow	unknow	unknow	unknow	2	unknow	unknow	unknow	unknow	unknow	GSE38832	unknow
GSE17536_GSM437243	318.3	1	69	male	unknow	2	4	unknow	unknow	unknow	unknow	unknow	GSE17536	unknow
TCGA_TCGA-DM-A288	320	1	68	Male	Right-side	unknow	3	T3	N2	M0	YES	unknow	TCGA	unknow
GSE39582_GSM972519	330	1	58	Male	Left-side	unknow	2	T3	N0	M0	NO	Normal	GSE39582	NO
GSE39582_GSM972115	330	1	59	Female	Left-side	unknow	3	T3	N3	M0	NO	Normal	GSE39582	YES
GSE39582_GSM972117	330	1	78	Female	Right-side	unknow	3	T3	N1	M0	NO	Abnormal	GSE39582	YES
GSE39582_GSM972129	330	0	76	Male	Left-side	unknow	2	T2	N0	M0	YES	Normal	GSE39582	NO
GSE39582_GSM972183	330	1	62	Female	Left-side	unknow	3	unknow	unknow	unknow	YES	Normal	GSE39582	YES
GSE39582_GSM972188	330	1	58	Female	Left-side	unknow	3	T3	N2	M0	YES	Normal	GSE39582	YES
TCGA_TCGA-CM-6172	335	0	70	Female	Left-side	unknow	3	T3	N1	M0	unknow	unknow	TCGA	unknow
TCGA_TCGA-CM-6678	335	1	63	Female	Left-side	unknow	4	T4	N1	M1	YES	Normal	TCGA	unknow
TCGA_TCGA-CM-6675	337	1	35	Male	Right-side	unknow	4	T3	N2	M1	unknow	unknow	TCGA	unknow
TCGA_TCGA-CM-6676	337	0	82	Male	Left-side	unknow	1	T2	N0	M0	unknow	unknow	TCGA	unknow
TCGA_TCGA-CM-6677	337	0	75	Female	Right-side	unknow	2	T3	N0	M0	unknow	unknow	TCGA	unknow
GSE38832_GSM950454	342.9	0	unknow	unknow	unknow	unknow	2	unknow	unknow	unknow	unknow	unknow	GSE38832	unknow
GSE38832_GSM950505	342.9	0	unknow	unknow	unknow	unknow	3	unknow	unknow	unknow	unknow	unknow	GSE38832	unknow
TCGA_TCGA-AD-6888	343	1	73	Male	Right-side	unknow	3	T3	N1	M0	unknow	unknow	TCGA	unknow
TCGA_TCGA-D5-6932	346	0	69	Male	Right-side	unknow	2	T3	N0	M0	unknow	unknow	TCGA	unknow
GSE38832_GSM950486	351	1	unknow	unknow	unknow	unknow	3	unknow	unknow	unknow	unknow	unknow	GSE38832	unknow
TCGA_TCGA-CA-6719	354	1	77	Male	Left-side	unknow	2	T3	N0	M0	unknow	unknow	TCGA	unknow
TCGA_TCGA-D5-6928	354	0	80	Male	Right-side	unknow	2	T3	N0	M0	unknow	unknow	TCGA	unknow
GSE17536_GSM437174	357	1	46	male	unknow	2	3	unknow	unknow	unknow	unknow	unknow	GSE17536	unknow
GSE39582_GSM972459	360	0	80	Male	Right-side	unknow	2	T3	N0	M0	NO	Normal	GSE39582	NO
GSE39582_GSM971990	360	0	83.1	Male	Right-side	unknow	1	T2	N0	M0	YES	Normal	GSE39582	NO
GSE39582_GSM972097	360	1	64	Male	Right-side	unknow	3	T4	N1	M0	YES	Normal	GSE39582	YES
GSE39582_GSM972236	360	0	71	Male	Left-side	unknow	4	T1	N0	M1	NO	Normal	GSE39582	YES
GSE39582_GSM972250	360	0	52	Male	Left-side	unknow	3	T3	N1	M0	YES	Normal	GSE39582	YES
GSE39582_GSM972359	360	1	56	Female	Right-side	unknow	2	T3	N0	M0	NO	Normal	GSE39582	YES
TCGA_TCGA-A6-4105	364	1	79	Male	Right-side	unknow	2	T3	N0	M0	unknow	unknow	TCGA	unknow
TCGA_TCGA-AA-3844	365	1	78	Female	Left-side	unknow	3	T3	N2	M0	unknow	unknow	TCGA	unknow
TCGA_TCGA-AA-A01G	365	0	63	Male	Right-side	unknow	2	T3	N0	M0	unknow	unknow	TCGA	unknow
TCGA_TCGA-CM-6162	365	0	48	Female	Right-side	unknow	3	T3	N1	M0	unknow	unknow	TCGA	unknow
TCGA_TCGA-D5-6931	365	0	77	Male	Right-side	unknow	3	T4	N2	M0	unknow	unknow	TCGA	unknow
GSE38832_GSM950448	365.1	0	unknow	unknow	unknow	unknow	2	unknow	unknow	unknow	unknow	unknow	GSE38832	unknow
TCGA_TCGA-CM-6680	366	0	78	Female	Right-side	unknow	3	T3	N2	M0	unknow	unknow	TCGA	unknow
TCGA_TCGA-AD-5900	370	0	67	Male	Right-side	unknow	1	T2	N0	unknow	unknow	unknow	TCGA	unknow
TCGA_TCGA-CA-6716	371	0	65	Male	Right-side	unknow	2	T3	N0	M0	unknow	unknow	TCGA	unknow
TCGA_TCGA-CA-5255	376	0	45	Male	Right-side	unknow	2	T3	N0	M0	unknow	unknow	TCGA	unknow
TCGA_TCGA-CA-5796	377	0	52	Female	Right-side	unknow	2	T3	N0	M0	unknow	unknow	TCGA	unknow
TCGA_TCGA-D5-6920	377	0	77	Female	Left-side	unknow	2	T3	N0	M0	unknow	unknow	TCGA	unknow
TCGA_TCGA-D5-6923	378	0	57	Male	Left-side	unknow	1	T2	N0	M0	unknow	unknow	TCGA	unknow
TCGA_TCGA-CA-5256	379	0	54	Female	Right-side	unknow	2	T3	N0	M0	unknow	unknow	TCGA	unknow
TCGA_TCGA-CA-5797	383	0	56	Male	Left-side	unknow	2	T3	N0	M0	unknow	unknow	TCGA	unknow
TCGA_TCGA-CA-6715	383	0	63	Male	Left-side	unknow	3	T3	N1	M0	unknow	unknow	TCGA	unknow
TCGA_TCGA-4T-AA8H	385	0	42	Female	Left-side	unknow	2	T3	N0	unknow	unknow	unknow	TCGA	unknow
TCGA_TCGA-CA-5254	386	0	42	Female	Right-side	unknow	2	T3	N0	M0	unknow	unknow	TCGA	unknow
TCGA_TCGA-CA-6717	388	0	57	Male	Right-side	unknow	2	T3	N0	M0	unknow	unknow	TCGA	unknow
TCGA_TCGA-NH-A6GC	389	0	66	Female	Left-side	unknow	4	T4	N1	M1	YES	unknow	TCGA	unknow
GSE38832_GSM950480	389.1	0	unknow	unknow	unknow	unknow	3	unknow	unknow	unknow	unknow	unknow	GSE38832	unknow
GSE39582_GSM972422	390	1	74	Male	Right-side	unknow	2	unknow	unknow	unknow	YES	Normal	GSE39582	NO
GSE39582_GSM972423	390	1	52	Female	Left-side	unknow	2	unknow	unknow	unknow	NO	Normal	GSE39582	YES
GSE39582_GSM972513	390	1	85	Male	Right-side	unknow	3	T3	N1	M0	YES	Normal	GSE39582	NO
GSE39582_GSM972111	390	1	63	Male	Left-side	unknow	3	T3	N2	M0	unknow	unknow	GSE39582	YES
GSE39582_GSM972181	390	1	69	Male	Right-side	unknow	3	unknow	unknow	unknow	YES	Normal	GSE39582	YES
GSE39582_GSM972256	390	1	63	Female	Left-side	unknow	4	T4	N1	M1	NO	Normal	GSE39582	YES
GSE39582_GSM972260	390	0	70	Male	Left-side	unknow	4	T3	N2	M1	YES	Normal	GSE39582	YES
GSE39582_GSM972271	390	1	92	Male	Right-side	unknow	3	T4	N1	M0	YES	Normal	GSE39582	NO
GSE17536_GSM437261	392.4	1	66	male	unknow	2	4	unknow	unknow	unknow	unknow	unknow	GSE17536	unknow
TCGA_TCGA-AA-3867	394	1	74	Male	Left-side	unknow	4	T3	N2	M1	unknow	unknow	TCGA	unknow
TCGA_TCGA-CM-6674	394	0	39	Male	Right-side	unknow	2	T3	N0	M0	unknow	unknow	TCGA	unknow
TCGA_TCGA-AA-3542	395	0	69	Male	Left-side	unknow	3	T3	N2	M0	unknow	unknow	TCGA	unknow
TCGA_TCGA-CM-6168	395	0	84	Female	Right-side	unknow	2	T3	N0	M0	unknow	unknow	TCGA	unknow
TCGA_TCGA-AA-3692	396	1	47	Female	Left-side	unknow	4	T3	N2	M1	unknow	unknow	TCGA	unknow
TCGA_TCGA-AA-3842	396	1	51	Male	Left-side	unknow	3	T2	N1	M0	unknow	unknow	TCGA	unknow
TCGA_TCGA-AY-A54L	396	1	74	Female	Right-side	unknow	1	T2	N0	M0	unknow	unknow	TCGA	unknow
TCGA_TCGA-CM-4752	396	0	58	Male	Right-side	unknow	2	T3	N0	M0	unknow	unknow	TCGA	unknow
TCGA_TCGA-CM-6169	396	0	67	Male	Right-side	unknow	2	T3	N0	M0	unknow	unknow	TCGA	unknow
TCGA_TCGA-AA-3973	397	0	69	Male	Left-side	unknow	4	T4	N1	M1	unknow	unknow	TCGA	unknow
TCGA_TCGA-D5-6930	406	0	67	Male	Right-side	unknow	2	T3	N0	M0	unknow	unknow	TCGA	unknow
TCGA_TCGA-F4-6460	407	0	51	Female	Left-side	unknow	3	T3	N1	M0	unknow	unknow	TCGA	unknow
TCGA_TCGA-D5-6929	408	0	49	Female	Left-side	unknow	4	T3	N1	M1	unknow	unknow	TCGA	unknow
GSE38832_GSM950469	416.1	0	unknow	unknow	unknow	unknow	1	unknow	unknow	unknow	unknow	unknow	GSE38832	unknow
TCGA_TCGA-G4-6323	419	0	50	Male	Right-side	unknow	1	T1	N0	unknow	unknow	unknow	TCGA	unknow
GSE39582_GSM972435	420	1	71	Male	Left-side	unknow	3	unknow	unknow	unknow	NO	Normal	GSE39582	YES
GSE39582_GSM972509	420	0	73	Female	Left-side	unknow	1	T2	N0	M0	NO	Normal	GSE39582	NO
GSE39582_GSM972016	420	1	74.5	Female	Right-side	unknow	2	T3	N0	M0	NO	Normal	GSE39582	NO
GSE39582_GSM972125	420	1	64	Female	Left-side	unknow	2	T3	N0	M0	NO	Normal	GSE39582	YES
GSE39582_GSM972186	420	1	50	Female	Right-side	unknow	3	unknow	unknow	unknow	YES	Normal	GSE39582	YES
GSE39582_GSM972231	420	0	54	Male	Left-side	unknow	4	T3	N1	M1	NO	Normal	GSE39582	YES
GSE39582_GSM972239	420	0	59	Male	Left-side	unknow	2	T3	N0	M0	NO	Normal	GSE39582	NO
GSE39582_GSM972240	420	0	67	Female	Left-side	unknow	4	T3	N1	M1	NO	Normal	GSE39582	YES
GSE39582_GSM972244	420	0	51	Female	Left-side	unknow	1	T1	N0	M0	NO	Normal	GSE39582	NO
GSE39582_GSM972248	420	0	58	Male	Right-side	unknow	2	T3	N0	M0	unknow	unknow	GSE39582	NO
GSE39582_GSM972249	420	0	74	Female	Right-side	unknow	1	T1	N0	M0	YES	Normal	GSE39582	NO
GSE39582_GSM972366	420	1	50	Male	Right-side	unknow	3	T3	N2	M0	YES	Normal	GSE39582	YES
GSE17536_GSM437130	423.9	1	54	female	unknow	2	2	unknow	unknow	unknow	unknow	unknow	GSE17536	unknow
TCGA_TCGA-AA-3561	424	0	72	Male	Right-side	unknow	2	T3	N0	M0	unknow	unknow	TCGA	unknow
TCGA_TCGA-AA-A004	424	0	76	Male	Left-side	unknow	2	T3	N0	M0	unknow	unknow	TCGA	unknow
TCGA_TCGA-AA-3544	426	0	68	Male	Left-side	unknow	1	T2	N0	M0	unknow	unknow	TCGA	unknow
TCGA_TCGA-AA-3667	426	0	36	Female	Left-side	unknow	1	T2	N0	M0	unknow	unknow	TCGA	unknow
TCGA_TCGA-CM-6163	427	0	74	Male	Left-side	unknow	1	T1	N0	M0	unknow	unknow	TCGA	unknow
TCGA_TCGA-CM-6171	427	0	77	Female	Right-side	unknow	1	T2	N0	M0	unknow	unknow	TCGA	unknow
TCGA_TCGA-D5-6924	435	0	68	Male	Left-side	unknow	2	T3	N0	M0	unknow	unknow	TCGA	unknow
GSE38832_GSM950487	438	1	unknow	unknow	unknow	unknow	2	unknow	unknow	unknow	unknow	unknow	GSE38832	unknow
GSE38832_GSM950447	438.9	0	unknow	unknow	unknow	unknow	1	unknow	unknow	unknow	unknow	unknow	GSE38832	unknow
TCGA_TCGA-A6-A565	439	1	34	Female	Right-side	unknow	3	T3	N2	unknow	unknow	unknow	TCGA	unknow
GSE17536_GSM437183	441.6	1	60	male	unknow	1	3	unknow	unknow	unknow	unknow	unknow	GSE17536	unknow
GSE39582_GSM972518	450	1	82	Female	Right-side	unknow	3	T4	N1	M0	YES	Normal	GSE39582	NO
GSE39582_GSM971988	450	1	77.2	Female	Right-side	unknow	4	T4	N1	M1	NO	Abnormal	GSE39582	NO
GSE39582_GSM972052	450	0	68	Male	Left-side	unknow	2	T2	N0	M0	YES	Normal	GSE39582	NO
GSE39582_GSM972098	450	0	66	Male	Left-side	unknow	3	T4	N2	M0	YES	Normal	GSE39582	YES
GSE39582_GSM972099	450	0	78	Male	Left-side	unknow	3	T3	N1	M0	NO	Normal	GSE39582	YES
GSE39582_GSM972141	450	1	58	Male	Left-side	unknow	3	T3	N2	M0	NO	unknow	GSE39582	YES
GSE39582_GSM972173	450	1	59	Female	Left-side	unknow	2	T4	N0	M0	YES	Normal	GSE39582	YES
GSE39582_GSM972233	450	0	67	Male	Left-side	unknow	2	T3	N0	M0	NO	Normal	GSE39582	NO
GSE39582_GSM972272	450	0	47	Female	Right-side	unknow	4	T3	N1	M1	YES	Normal	GSE39582	YES
GSE17536_GSM437170	451.5	0	54	male	unknow	2	2	unknow	unknow	unknow	unknow	unknow	GSE17536	unknow
TCGA_TCGA-AA-A00W	456	0	80	Male	Left-side	unknow	1	T1	N0	M0	unknow	unknow	TCGA	unknow
TCGA_TCGA-CM-6167	456	0	57	Female	Right-side	unknow	3	T3	N2	M0	unknow	unknow	TCGA	unknow
TCGA_TCGA-AA-3679	457	0	59	Male	Left-side	unknow	4	T3	N2	M1	unknow	unknow	TCGA	unknow
TCGA_TCGA-AA-A017	457	0	57	Female	Left-side	unknow	2	T3	N0	M0	unknow	unknow	TCGA	unknow
TCGA_TCGA-AA-A01C	457	0	75	Male	Right-side	unknow	3	T2	N1	M0	unknow	unknow	TCGA	unknow
TCGA_TCGA-CM-5861	457	0	63	Female	Right-side	unknow	2	T3	N0	M0	unknow	unknow	TCGA	unknow
TCGA_TCGA-CM-5863	457	0	60	Female	Right-side	unknow	3	T3	N1	M0	unknow	unknow	TCGA	unknow
TCGA_TCGA-CM-5864	457	0	60	Male	Right-side	unknow	1	T2	N0	M0	unknow	unknow	TCGA	unknow
TCGA_TCGA-CM-6161	457	0	36	Female	Left-side	unknow	1	T2	N0	M0	unknow	unknow	TCGA	unknow
TCGA_TCGA-CM-6170	457	0	73	Female	Left-side	unknow	1	T2	N0	M0	unknow	unknow	TCGA	unknow
TCGA_TCGA-D5-6535	460	0	80	Female	Right-side	unknow	3	T3	N1	unknow	unknow	unknow	TCGA	unknow
GSE17536_GSM437156	471.3	0	73	male	unknow	2	2	unknow	unknow	unknow	unknow	unknow	GSE17536	unknow
TCGA_TCGA-D5-6541	474	0	49	Male	Left-side	unknow	2	T3	N0	M0	unknow	unknow	TCGA	unknow
TCGA_TCGA-3L-AA1B	475	0	61	Female	Right-side	unknow	1	T2	N0	M0	unknow	unknow	TCGA	unknow
TCGA_TCGA-NH-A6GB	476	0	71	Female	Right-side	unknow	3	T3	N2	unknow	NO	unknow	TCGA	unknow
TCGA_TCGA-CK-4951	480	1	79	Female	Right-side	unknow	2	T3	N0	M0	unknow	unknow	TCGA	unknow
GSE39582_GSM972413	480	1	66	Male	Left-side	unknow	3	T3	N1	M0	NO	Normal	GSE39582	YES
GSE39582_GSM971989	480	1	71.3	Male	Right-side	unknow	1	T2	N0	M0	YES	Normal	GSE39582	NO
GSE39582_GSM972252	480	0	37	Female	Right-side	unknow	4	T3	N1	M1	YES	Normal	GSE39582	YES
GSE39582_GSM972253	480	0	56	Female	Right-side	unknow	4	T3	N2	M1	NO	Normal	GSE39582	YES
GSE39582_GSM972273	480	0	84	Male	Left-side	unknow	0	T1	N0	M0	YES	Normal	GSE39582	NO
GSE17536_GSM437181	482.1	1	53	female	unknow	2	3	unknow	unknow	unknow	unknow	unknow	GSE17536	unknow
TCGA_TCGA-DM-A28H	484	1	50	Male	Right-side	unknow	3	T3	N2	M0	NO	Normal	TCGA	unknow
TCGA_TCGA-AA-3833	485	0	63	Female	Right-side	unknow	2	T3	N0	M0	unknow	unknow	TCGA	unknow
TCGA_TCGA-A6-2686	488	0	81	Female	Right-side	unknow	2	T3	N0	M0	unknow	unknow	TCGA	unknow
TCGA_TCGA-CM-6165	488	0	74	Male	Left-side	unknow	2	T3	N0	M0	unknow	unknow	TCGA	unknow
TCGA_TCGA-AA-3971	489	0	58	Male	Left-side	unknow	3	T3	N1	M0	unknow	unknow	TCGA	unknow
TCGA_TCGA-D5-6540	491	0	66	Male	Right-side	unknow	1	T2	N0	M0	unknow	unknow	TCGA	unknow
TCGA_TCGA-D5-6536	493	1	73	Male	Left-side	unknow	2	T3	N0	M0	unknow	unknow	TCGA	unknow
GSE17536_GSM437103	494.1	0	80	female	unknow	2	1	unknow	unknow	unknow	unknow	unknow	GSE17536	unknow
TCGA_TCGA-AD-A5EK	500	0	51	Male	Right-side	unknow	1	T2	N0	unknow	unknow	unknow	TCGA	unknow
GSE39582_GSM972458	510	0	65	Male	Right-side	unknow	2	T3	N0	M0	YES	Normal	GSE39582	NO
GSE39582_GSM971963	510	1	78.2	Male	Right-side	unknow	2	T3	N0	M0	NO	Normal	GSE39582	YES
GSE39582_GSM972179	510	1	77	Male	Left-side	unknow	2	unknow	unknow	unknow	NO	Normal	GSE39582	NO
GSE39582_GSM972241	510	0	61	Male	Left-side	unknow	2	T3	N0	M0	NO	Normal	GSE39582	NO
GSE39582_GSM972242	510	0	69	Male	Right-side	unknow	1	T2	N0	M0	YES	Normal	GSE39582	NO
GSE39582_GSM972289	510	0	72	Male	Right-side	unknow	4	T4	N1	M1	YES	Normal	GSE39582	YES
GSE39582_GSM972355	510	1	72	Male	Left-side	unknow	2	T3	N0	M0	YES	Normal	GSE39582	YES
TCGA_TCGA-G4-6294	517	1	75	Male	Right-side	unknow	4	T3	N1	M1	unknow	unknow	TCGA	unknow
TCGA_TCGA-AA-3866	518	0	78	Female	Right-side	unknow	1	T2	N0	M0	unknow	unknow	TCGA	unknow
TCGA_TCGA-AA-A00U	518	0	50	Male	Right-side	unknow	3	T3	N1	M0	unknow	unknow	TCGA	unknow
TCGA_TCGA-CK-6751	518	0	88	Female	Right-side	unknow	1	T2	N0	unknow	unknow	unknow	TCGA	unknow
TCGA_TCGA-CM-5868	518	0	59	Female	Left-side	unknow	4	T4	N1	M1	NO	Normal	TCGA	unknow
GSE17536_GSM437266	519.6	1	78	female	unknow	3	4	unknow	unknow	unknow	unknow	unknow	GSE17536	unknow
TCGA_TCGA-D5-6538	521	0	79	Female	Right-side	unknow	3	T3	N2	M0	unknow	unknow	TCGA	unknow
TCGA_TCGA-A6-5665	529	1	84	Female	Right-side	unknow	2	T3	N0	M0	unknow	Abnormal	TCGA	unknow
GSE17536_GSM437155	538.5	0	38	female	unknow	2	2	unknow	unknow	unknow	unknow	unknow	GSE17536	unknow
TCGA_TCGA-D5-6531	540	0	75	Male	Right-side	unknow	2	T3	N0	M0	unknow	unknow	TCGA	unknow
GSE39582_GSM972495	540	1	69	Female	Right-side	unknow	3	T3	N1	M0	NO	Normal	GSE39582	YES
GSE39582_GSM971998	540	1	74.8	Male	Right-side	unknow	3	T3	N1	M0	YES	Normal	GSE39582	NO
GSE39582_GSM972011	540	1	75.3	Female	Left-side	unknow	4	T4	N1	M1	NO	Abnormal	GSE39582	NO
GSE39582_GSM972113	540	1	63	Female	Right-side	unknow	3	T3	N1	M0	unknow	unknow	GSE39582	YES
GSE39582_GSM972361	540	1	72	Female	Left-side	unknow	3	T4	N2	M0	YES	Normal	GSE39582	YES
GSE39582_GSM972369	540	1	58	Male	Left-side	unknow	3	T3	N2	M0	NO	Normal	GSE39582	YES
TCGA_TCGA-A6-2677	541	0	68	Female	Right-side	unknow	3	T3	N2	M0	unknow	unknow	TCGA	unknow
TCGA_TCGA-AY-6386	542	0	66	Female	Right-side	unknow	3	T3	N1	M0	unknow	unknow	TCGA	unknow
GSE38832_GSM950452	542.1	1	unknow	unknow	unknow	unknow	3	unknow	unknow	unknow	unknow	unknow	GSE38832	unknow
TCGA_TCGA-AY-A69D	543	0	55	Female	Right-side	unknow	2	T3	N0	M0	unknow	unknow	TCGA	unknow
TCGA_TCGA-NH-A8F7	543	0	53	Female	Left-side	unknow	2	T3	N0	unknow	NO	unknow	TCGA	unknow
GSE17536_GSM437172	545.4	0	68	male	unknow	2	2	unknow	unknow	unknow	unknow	unknow	GSE17536	unknow
TCGA_TCGA-AA-3554	546	0	62	Female	Right-side	unknow	2	T3	N0	M0	unknow	unknow	TCGA	unknow
TCGA_TCGA-AA-3831	547	0	66	Male	Left-side	unknow	2	T3	N0	M0	unknow	unknow	TCGA	unknow
TCGA_TCGA-AA-A00J	549	0	80	Male	Right-side	unknow	3	T4	N1	M0	unknow	unknow	TCGA	unknow
TCGA_TCGA-NH-A50T	553	0	68	Female	Left-side	unknow	2	T3	N0	unknow	unknow	unknow	TCGA	unknow
TCGA_TCGA-D5-6532	555	0	61	Male	Left-side	unknow	2	T3	N0	M0	unknow	unknow	TCGA	unknow
GSE17536_GSM437226	568.8	0	61	female	unknow	2	3	unknow	unknow	unknow	unknow	unknow	GSE17536	unknow
TCGA_TCGA-DM-A1D6	570	0	88	Male	Left-side	unknow	2	T3	N0	M0	YES	Normal	TCGA	unknow
GSE39582_GSM972432	570	1	71	Male	Left-side	unknow	3	unknow	unknow	unknow	YES	Normal	GSE39582	YES
GSE39582_GSM972434	570	1	70	Male	Left-side	unknow	2	unknow	unknow	unknow	NO	Normal	GSE39582	NO
GSE39582_GSM972449	570	1	51	Female	Right-side	unknow	3	T4	N1	M0	YES	Normal	GSE39582	YES
GSE39582_GSM972450	570	1	80	Male	Left-side	unknow	2	T3	N0	M0	NO	Normal	GSE39582	NO
GSE39582_GSM972498	570	1	50	Female	Left-side	unknow	3	T3	N1	M0	NO	Normal	GSE39582	NO
GSE39582_GSM972050	570	0	75	Female	Left-side	unknow	2	T3	N0	M0	YES	Normal	GSE39582	NO
GSE39582_GSM972118	570	1	64	Male	Left-side	unknow	3	T3	N2	M0	YES	Normal	GSE39582	YES
GSE39582_GSM972122	570	1	97	Female	Right-side	unknow	3	T4	N1	M0	unknow	unknow	GSE39582	YES
GSE39582_GSM972180	570	1	66	Female	Left-side	unknow	2	unknow	unknow	unknow	NO	Normal	GSE39582	YES
GSE39582_GSM972238	570	0	53	Female	Left-side	unknow	3	T2	N1	M0	NO	Normal	GSE39582	YES
GSE39582_GSM972303	570	0	80	Female	Left-side	unknow	1	T2	N0	M0	NO	Normal	GSE39582	NO
TCGA_TCGA-AY-A8YK	573	0	44	Male	Left-side	unknow	4	T3	N2	M1	unknow	unknow	TCGA	unknow
TCGA_TCGA-AA-3688	578	0	80	Male	Left-side	unknow	4	T3	N1	M1	unknow	unknow	TCGA	unknow
TCGA_TCGA-AA-A00D	578	0	70	Male	Right-side	unknow	1	T2	N0	M0	unknow	unknow	TCGA	unknow
TCGA_TCGA-AA-3713	579	0	68	Male	Right-side	unknow	4	T3	N0	M1	unknow	unknow	TCGA	unknow
TCGA_TCGA-D5-5539	579	1	60	Male	Right-side	unknow	3	T3	N1	M0	unknow	unknow	TCGA	unknow
TCGA_TCGA-AA-3526	580	0	57	Male	Left-side	unknow	1	T2	N0	M0	unknow	unknow	TCGA	unknow
TCGA_TCGA-AA-3530	580	0	80	Male	Right-side	unknow	1	T2	N0	M0	unknow	unknow	TCGA	unknow
TCGA_TCGA-AA-3986	580	0	73	Male	Right-side	unknow	1	T2	N0	M0	unknow	unknow	TCGA	unknow
GSE17536_GSM437124	580.8	1	80	male	unknow	2	2	unknow	unknow	unknow	unknow	unknow	GSE17536	unknow
TCGA_TCGA-AY-A71X	588	0	54	Female	Right-side	unknow	1	T2	N0	M0	unknow	unknow	TCGA	unknow
TCGA_TCGA-NH-A50V	588	0	69	Male	Right-side	unknow	3	T3	N2	M0	unknow	unknow	TCGA	unknow
TCGA_TCGA-G4-6317	592	1	51	Female	Left-side	unknow	3	T3	N2	unknow	NO	unknow	TCGA	unknow
GSE17536_GSM437113	592.5	0	58	male	unknow	2	1	unknow	unknow	unknow	unknow	unknow	GSE17536	unknow
GSE38832_GSM950485	593.1	0	unknow	unknow	unknow	unknow	2	unknow	unknow	unknow	unknow	unknow	GSE38832	unknow
GSE17536_GSM437229	599.4	0	81	female	unknow	3	3	unknow	unknow	unknow	unknow	unknow	GSE17536	unknow
GSE39582_GSM971992	600	0	85.6	Male	Left-side	unknow	2	T4	N0	M0	NO	Normal	GSE39582	NO
GSE39582_GSM972177	600	1	71	Male	Right-side	unknow	2	unknow	unknow	unknow	YES	Normal	GSE39582	NO
GSE39582_GSM972224	600	1	74	Male	Right-side	unknow	3	T4	N2	M0	unknow	unknow	GSE39582	YES
GSE39582_GSM972226	600	0	57	Male	Right-side	unknow	2	T4	N0	M0	YES	Normal	GSE39582	NO
GSE39582_GSM972227	600	0	61	Male	Right-side	unknow	4	T3	N2	M1	YES	Normal	GSE39582	YES
GSE39582_GSM972266	600	0	56	Male	Left-side	unknow	4	T4	N2	M1	NO	Normal	GSE39582	YES
GSE17536_GSM437116	600.6	0	81	male	unknow	2	1	unknow	unknow	unknow	unknow	unknow	GSE17536	unknow
TCGA_TCGA-G4-6314	605	1	76	Female	Right-side	unknow	4	T3	N2	M1	NO	Normal	TCGA	unknow
TCGA_TCGA-AA-3560	608	0	72	Female	Left-side	unknow	3	T3	N2	M0	unknow	unknow	TCGA	unknow
TCGA_TCGA-AA-A01R	608	1	47	Male	Right-side	unknow	3	T3	N2	M0	unknow	unknow	TCGA	unknow
TCGA_TCGA-CM-4744	609	0	69	Male	Right-side	unknow	1	T2	N0	M0	unknow	unknow	TCGA	unknow
GSE38832_GSM950500	609.9	0	unknow	unknow	unknow	unknow	2	unknow	unknow	unknow	unknow	unknow	GSE38832	unknow
TCGA_TCGA-A6-A567	612	1	56	Male	Left-side	unknow	4	T3	N1	M1	unknow	unknow	TCGA	unknow
GSE38832_GSM950484	612.9	0	unknow	unknow	unknow	unknow	3	unknow	unknow	unknow	unknow	unknow	GSE38832	unknow
GSE17536_GSM437186	613.2	0	63	male	unknow	2	3	unknow	unknow	unknow	unknow	unknow	GSE17536	unknow
GSE38832_GSM950459	623.1	0	unknow	unknow	unknow	unknow	3	unknow	unknow	unknow	unknow	unknow	GSE38832	unknow
GSE38832_GSM950479	624.9	0	unknow	unknow	unknow	unknow	2	unknow	unknow	unknow	unknow	unknow	GSE38832	unknow
GSE39582_GSM972019	630	1	54	Male	Right-side	unknow	3	T3	N3	M0	NO	Abnormal	GSE39582	YES
GSE39582_GSM972046	630	1	54	Male	Left-side	unknow	2	T3	N0	M0	NO	Normal	GSE39582	NO
GSE39582_GSM972101	630	1	56	Male	Left-side	unknow	3	T3	N1	M0	unknow	unknow	GSE39582	YES
GSE39582_GSM972178	630	1	69	Female	Right-side	unknow	3	unknow	unknow	unknow	YES	Normal	GSE39582	YES
GSE39582_GSM972232	630	0	69	Male	Left-side	unknow	4	T4	N2	M1	YES	Normal	GSE39582	YES
GSE39582_GSM972392	630	1	75	Female	Right-side	unknow	2	T4	N0	M0	YES	Normal	GSE39582	NO
GSE17536_GSM437214	631.2	1	46	male	unknow	2	3	unknow	unknow	unknow	unknow	unknow	GSE17536	unknow
TCGA_TCGA-AA-3955	638	0	38	Male	Left-side	unknow	3	T2	N2	M0	unknow	unknow	TCGA	unknow
GSE17536_GSM437180	638.1	1	53	male	unknow	1	3	unknow	unknow	unknow	unknow	unknow	GSE17536	unknow
TCGA_TCGA-AA-3549	639	0	69	Male	Right-side	unknow	1	T2	N0	M0	unknow	unknow	TCGA	unknow
TCGA_TCGA-A6-5664	643	1	80	Male	Right-side	unknow	3	T4	N2	unknow	unknow	unknow	TCGA	unknow
GSE38832_GSM950531	647.1	0	unknow	unknow	unknow	unknow	3	unknow	unknow	unknow	unknow	unknow	GSE38832	unknow
TCGA_TCGA-AD-6965	648	1	62	Male	Right-side	unknow	3	T4	N2	M0	unknow	unknow	TCGA	unknow
GSE38832_GSM950477	648.9	0	unknow	unknow	unknow	unknow	1	unknow	unknow	unknow	unknow	unknow	GSE38832	unknow
TCGA_TCGA-AD-6548	650	0	81	Female	Left-side	unknow	1	T2	N0	M0	unknow	unknow	TCGA	unknow
TCGA_TCGA-AY-6197	652	0	60	Male	Right-side	unknow	2	T3	N0	unknow	unknow	unknow	TCGA	unknow
TCGA_TCGA-A6-6142	654	1	56	Female	Left-side	unknow	4	T3	N1	M1	NO	unknow	TCGA	unknow
GSE39582_GSM972421	660	1	66	Male	Left-side	unknow	3	unknow	unknow	unknow	NO	Normal	GSE39582	NO
GSE39582_GSM972185	660	1	58	Female	Left-side	unknow	3	unknow	unknow	unknow	NO	Normal	GSE39582	YES
GSE39582_GSM972296	660	0	77	Female	Left-side	unknow	0	T1	N0	M0	YES	Normal	GSE39582	NO
GSE17536_GSM437145	660.6	1	78	female	unknow	2	2	unknow	unknow	unknow	unknow	unknow	GSE17536	unknow
TCGA_TCGA-A6-5662	661	1	46	Male	Left-side	unknow	4	T3	N2	M1	YES	unknow	TCGA	unknow
TCGA_TCGA-A6-6651	662	0	55	Female	Right-side	unknow	3	T3	N1	unknow	unknow	unknow	TCGA	unknow
TCGA_TCGA-QL-A97D	666	0	84	Female	Right-side	unknow	1	T2	N0	unknow	unknow	unknow	TCGA	unknow
GSE17536_GSM437193	667.5	0	87	female	unknow	1	3	unknow	unknow	unknow	unknow	unknow	GSE17536	unknow
TCGA_TCGA-AA-3968	669	0	55	Female	Left-side	unknow	1	T2	N0	M0	unknow	unknow	TCGA	unknow
TCGA_TCGA-AA-A00Z	669	0	70	Male	Left-side	unknow	2	T3	N0	M0	unknow	unknow	TCGA	unknow
TCGA_TCGA-CM-6166	669	0	48	Female	Right-side	unknow	1	T2	N0	M0	unknow	unknow	TCGA	unknow
TCGA_TCGA-CM-5344	670	0	39	Female	Left-side	unknow	3	T3	N1	M0	unknow	unknow	TCGA	unknow
GSE17536_GSM437139	671.4	1	65	female	unknow	2	2	unknow	unknow	unknow	unknow	unknow	GSE17536	unknow
GSE17536_GSM437169	671.4	1	65	female	unknow	2	2	unknow	unknow	unknow	unknow	unknow	GSE17536	unknow
TCGA_TCGA-G4-6321	672	0	60	Female	Right-side	unknow	3	T2	N1	unknow	unknow	unknow	TCGA	unknow
GSE38832_GSM950455	684.9	0	unknow	unknow	unknow	unknow	3	unknow	unknow	unknow	unknow	unknow	GSE38832	unknow
TCGA_TCGA-A6-6138	685	0	61	Male	Right-side	unknow	1	T2	N0	M0	unknow	unknow	TCGA	unknow
GSE38832_GSM950478	687.9	1	unknow	unknow	unknow	unknow	3	unknow	unknow	unknow	unknow	unknow	GSE38832	unknow
GSE39582_GSM972483	690	1	80	Female	Left-side	unknow	2	T3	N0	M0	NO	Normal	GSE39582	NO
GSE39582_GSM972182	690	1	53	Male	Left-side	unknow	2	T4	N0	M0	NO	Normal	GSE39582	NO
GSE39582_GSM972354	690	1	68	Female	Right-side	unknow	3	T3	N2	M0	NO	Normal	GSE39582	NO
TCGA_TCGA-CM-5348	699	0	72	Male	Right-side	unknow	3	T3	N1	M0	unknow	unknow	TCGA	unknow
GSE17536_GSM437189	700.2	1	63	male	unknow	2	3	unknow	unknow	unknow	unknow	unknow	GSE17536	unknow
TCGA_TCGA-CM-4743	701	0	69	Male	Right-side	unknow	2	T3	N0	M0	unknow	unknow	TCGA	unknow
TCGA_TCGA-A6-2676	711	0	75	Female	Right-side	unknow	2	T4	N0	M0	unknow	unknow	TCGA	unknow
GSE17536_GSM437115	718.8	0	57	male	unknow	1	1	unknow	unknow	unknow	unknow	unknow	GSE17536	unknow
GSE39582_GSM972468	720	0	73	Male	Left-side	unknow	2	T3	N0	M0	NO	Normal	GSE39582	NO
GSE39582_GSM972504	720	1	80	Male	Left-side	unknow	3	T3	N2	M0	YES	Normal	GSE39582	NO
GSE39582_GSM972351	720	0	71	Male	Left-side	unknow	2	T4	N0	M0	NO	Normal	GSE39582	NO
GSE39582_GSM972387	720	1	62	Male	Left-side	unknow	2	T3	N0	M0	NO	Normal	GSE39582	NO
GSE38832_GSM950499	723	0	unknow	unknow	unknow	unknow	1	unknow	unknow	unknow	unknow	unknow	GSE38832	unknow
GSE17536_GSM437223	723.9	1	75	female	unknow	2	3	unknow	unknow	unknow	unknow	unknow	GSE17536	unknow
GSE17536_GSM437147	725.7	0	66	female	unknow	3	2	unknow	unknow	unknow	unknow	unknow	GSE17536	unknow
TCGA_TCGA-A6-6654	726	0	65	Female	Left-side	unknow	3	T3	N1	M0	unknow	unknow	TCGA	unknow
GSE38832_GSM950496	729.9	0	unknow	unknow	unknow	unknow	1	unknow	unknow	unknow	unknow	unknow	GSE38832	unknow
TCGA_TCGA-AA-3553	730	0	61	Female	Left-side	unknow	1	T2	N0	M0	unknow	unknow	TCGA	unknow
TCGA_TCGA-AA-3950	730	0	79	Female	Right-side	unknow	2	T3	N0	M0	unknow	unknow	TCGA	unknow
TCGA_TCGA-AA-3979	730	0	84	Male	Left-side	unknow	2	T3	N0	M0	unknow	unknow	TCGA	unknow
TCGA_TCGA-A6-6140	734	0	62	Male	Left-side	unknow	2	T3	N0	M0	unknow	unknow	TCGA	unknow
GSE38832_GSM950465	744.9	0	unknow	unknow	unknow	unknow	2	unknow	unknow	unknow	unknow	unknow	GSE38832	unknow
GSE17536_GSM437199	745.5	1	66	male	unknow	2	3	unknow	unknow	unknow	unknow	unknow	GSE17536	unknow
GSE17536_GSM437248	746.4	1	52	male	unknow	3	4	unknow	unknow	unknow	unknow	unknow	GSE17536	unknow
GSE39582_GSM971995	750	0	61.8	Female	Left-side	unknow	2	T4	N0	M0	NO	Normal	GSE39582	NO
GSE39582_GSM972002	750	1	77.8	Male	Left-side	unknow	3	T4	N1	M0	YES	Normal	GSE39582	NO
GSE39582_GSM972100	750	0	71	Female	Right-side	unknow	3	T4	N2	M0	YES	Normal	GSE39582	YES
GSE39582_GSM972119	750	1	96	Male	Left-side	unknow	3	T4	N1	M0	unknow	unknow	GSE39582	YES
GSE39582_GSM972237	750	0	55	Female	Left-side	unknow	1	T1	N0	M0	NO	Normal	GSE39582	NO
GSE39582_GSM972292	750	0	62	Female	Right-side	unknow	2	T3	N0	M0	NO	Abnormal	GSE39582	NO
GSE39582_GSM972294	750	0	74	Male	Left-side	unknow	2	T3	N0	M0	NO	Abnormal	GSE39582	NO
GSE39582_GSM972310	750	0	80	Female	Right-side	unknow	3	T3	N1	M0	YES	Normal	GSE39582	NO
TCGA_TCGA-A6-6652	751	0	59	Male	Left-side	unknow	4	T3	N0	M1	unknow	unknow	TCGA	unknow
GSE38832_GSM950470	753	0	unknow	unknow	unknow	unknow	3	unknow	unknow	unknow	unknow	unknow	GSE38832	unknow
GSE17536_GSM437142	756.3	1	56	female	unknow	3	2	unknow	unknow	unknow	unknow	unknow	GSE17536	unknow
GSE17536_GSM437159	757.2	0	71	male	unknow	2	2	unknow	unknow	unknow	unknow	unknow	GSE17536	unknow
TCGA_TCGA-AA-3819	761	0	41	Female	Left-side	unknow	2	T3	N0	M0	unknow	unknow	TCGA	unknow
TCGA_TCGA-CM-4747	761	1	47	Male	Right-side	unknow	4	T4	N1	M1	unknow	unknow	TCGA	unknow
TCGA_TCGA-AA-3812	762	1	82	Female	Left-side	unknow	2	T3	N0	M0	unknow	unknow	TCGA	unknow
TCGA_TCGA-AA-A01P	762	1	80	Female	Right-side	unknow	3	T3	N1	M0	unknow	unknow	TCGA	unknow
TCGA_TCGA-AD-6895	763	0	84	Male	Right-side	unknow	3	T3	N1	M0	unknow	unknow	TCGA	unknow
GSE17536_GSM437168	768.3	0	78	male	unknow	2	2	unknow	unknow	unknow	unknow	unknow	GSE17536	unknow
GSE39582_GSM972049	780	0	79	Male	Right-side	unknow	2	T3	N0	M0	YES	Normal	GSE39582	NO
GSE39582_GSM972054	780	0	82	Male	Right-side	unknow	2	T3	N0	M0	YES	Normal	GSE39582	NO
GSE39582_GSM972057	780	0	70	Male	Left-side	unknow	2	T3	N0	M0	NO	Normal	GSE39582	NO
GSE39582_GSM972077	780	1	58	Female	Left-side	unknow	2	T3	N0	M0	YES	Normal	GSE39582	NO
GSE39582_GSM972081	780	0	68	Female	Left-side	unknow	2	T3	N0	M0	YES	Normal	GSE39582	NO
GSE17536_GSM437212	787.8	0	78	female	unknow	3	3	unknow	unknow	unknow	unknow	unknow	GSE17536	unknow
TCGA_TCGA-G4-6322	789	1	65	Male	Left-side	unknow	3	T3	N1	unknow	unknow	unknow	TCGA	unknow
TCGA_TCGA-AA-3538	791	0	54	Female	Left-side	unknow	1	T2	N0	M0	unknow	unknow	TCGA	unknow
TCGA_TCGA-AA-3949	791	0	87	Female	Right-side	unknow	3	T3	N1	M0	unknow	unknow	TCGA	unknow
TCGA_TCGA-AA-A01X	791	1	80	Female	Left-side	unknow	3	T2	N1	M0	unknow	unknow	TCGA	unknow
TCGA_TCGA-CM-4748	792	0	53	Male	Right-side	unknow	3	T4	N1	M0	unknow	unknow	TCGA	unknow
GSE17536_GSM437132	795.9	0	79	female	unknow	2	2	unknow	unknow	unknow	unknow	unknow	GSE17536	unknow
TCGA_TCGA-G4-6588	796	0	58	Female	Right-side	unknow	2	T3	N0	M0	unknow	unknow	TCGA	unknow
GSE17536_GSM437162	799.8	0	71	male	unknow	2	2	unknow	unknow	unknow	unknow	unknow	GSE17536	unknow
TCGA_TCGA-G4-6320	804	0	73	Male	Right-side	unknow	3	T3	N1	unknow	unknow	unknow	TCGA	unknow
GSE17536_GSM437125	804.6	0	66	male	unknow	2	2	unknow	unknow	unknow	unknow	unknow	GSE17536	unknow
TCGA_TCGA-DM-A28A	805	0	78	Male	Right-side	unknow	3	T3	N2	M0	YES	Normal	TCGA	unknow
GSE17536_GSM437210	807.6	0	71	female	unknow	2	3	unknow	unknow	unknow	unknow	unknow	GSE17536	unknow
TCGA_TCGA-5M-AATE	810	1	76	Male	Right-side	unknow	2	T3	N0	M0	YES	unknow	TCGA	unknow
GSE39582_GSM972133	810	1	64	Male	Left-side	unknow	3	T3	unknow	M0	NO	unknow	GSE39582	YES
GSE39582_GSM972230	810	0	55	Male	Left-side	unknow	3	T3	N1	M0	NO	Normal	GSE39582	YES
GSE39582_GSM972284	810	0	63	Female	Left-side	unknow	4	T4	N2	M1	YES	Normal	GSE39582	YES
GSE39582_GSM972302	810	0	79	Male	Right-side	unknow	3	T4	N1	M0	YES	Normal	GSE39582	NO
GSE39582_GSM972381	810	1	63	Male	Left-side	unknow	2	T3	N0	M0	NO	Normal	GSE39582	YES
GSE17536_GSM437098	810.6	1	63	female	unknow	2	1	unknow	unknow	unknow	unknow	unknow	GSE17536	unknow
GSE17536_GSM437173	814.5	0	52	female	unknow	2	2	unknow	unknow	unknow	unknow	unknow	GSE17536	unknow
TCGA_TCGA-CK-6747	820	0	87	Female	Right-side	unknow	2	T3	N0	unknow	unknow	unknow	TCGA	unknow
TCGA_TCGA-AA-3517	821	1	60	Male	Left-side	unknow	2	T3	N0	M0	unknow	unknow	TCGA	unknow
TCGA_TCGA-AA-3710	821	0	80	Female	Right-side	unknow	2	T3	N0	M0	unknow	unknow	TCGA	unknow
TCGA_TCGA-AA-3994	822	0	69	Male	Right-side	unknow	3	T3	N1	M0	unknow	unknow	TCGA	unknow
TCGA_TCGA-AA-A00O	822	0	83	Female	Left-side	unknow	3	T3	N2	M0	unknow	unknow	TCGA	unknow
TCGA_TCGA-CM-4751	822	0	62	Male	Right-side	unknow	3	T3	N1	M0	unknow	unknow	TCGA	unknow
TCGA_TCGA-A6-6137	824	0	55	Male	Right-side	unknow	3	T3	N1	M0	unknow	unknow	TCGA	unknow
GSE17536_GSM437187	827.4	1	58	male	unknow	3	3	unknow	unknow	unknow	unknow	unknow	GSE17536	unknow
GSE38832_GSM950423	828	0	unknow	unknow	unknow	unknow	2	unknow	unknow	unknow	unknow	unknow	GSE38832	unknow
GSE17536_GSM437121	829.2	1	51	female	unknow	2	2	unknow	unknow	unknow	unknow	unknow	GSE17536	unknow
GSE17536_GSM437182	832.2	1	92	female	unknow	2	3	unknow	unknow	unknow	unknow	unknow	GSE17536	unknow
GSE39582_GSM972103	840	1	66	Male	Left-side	unknow	3	T3	N2	M0	YES	Normal	GSE39582	YES
GSE39582_GSM972175	840	1	83	Female	Left-side	unknow	3	T3	N1	M0	YES	Normal	GSE39582	NO
GSE39582_GSM972342	840	0	78	Male	Left-side	unknow	1	T2	N0	M0	NO	Normal	GSE39582	NO
GSE17536_GSM437164	858.9	0	84	female	unknow	2	2	unknow	unknow	unknow	unknow	unknow	GSE17536	unknow
TCGA_TCGA-G4-6304	859	1	66	Female	Right-side	unknow	2	T4	N0	M0	unknow	unknow	TCGA	unknow
GSE17536_GSM437141	865.8	0	89	female	unknow	1	2	unknow	unknow	unknow	unknow	unknow	GSE17536	unknow
GSE17536_GSM437095	868.8	0	51	male	unknow	2	1	unknow	unknow	unknow	unknow	unknow	GSE17536	unknow
GSE39582_GSM972053	870	0	55	Male	Right-side	unknow	2	T2	N0	M0	NO	Normal	GSE39582	NO
GSE39582_GSM972259	870	0	72	Female	Left-side	unknow	2	T4	N0	M0	YES	Normal	GSE39582	YES
TCGA_TCGA-G4-6303	872	1	54	Female	Left-side	unknow	4	T3	N1	M1	NO	unknow	TCGA	unknow
GSE17536_GSM437163	876.6	0	64	female	unknow	2	2	unknow	unknow	unknow	unknow	unknow	GSE17536	unknow
GSE17536_GSM437177	881.7	1	26	male	unknow	2	3	unknow	unknow	unknow	unknow	unknow	GSE17536	unknow
TCGA_TCGA-AA-3534	882	0	78	Female	Right-side	unknow	2	T3	N0	M0	unknow	unknow	TCGA	unknow
TCGA_TCGA-CM-6164	883	0	46	Female	Left-side	unknow	2	T3	N0	M0	unknow	unknow	TCGA	unknow
TCGA_TCGA-CM-5341	884	0	82	Female	Left-side	unknow	3	T2	N1	M0	unknow	unknow	TCGA	unknow
TCGA_TCGA-A6-5667	887	0	40	Female	Left-side	unknow	3	T3	N1	unknow	unknow	unknow	TCGA	unknow
TCGA_TCGA-A6-5660	888	0	73	Male	Right-side	unknow	3	T3	N2	M0	unknow	unknow	TCGA	unknow
TCGA_TCGA-QG-A5YW	896	0	55	Female	Right-side	unknow	3	T3	N2	unknow	unknow	unknow	TCGA	unknow
GSE39582_GSM972419	900	1	85	Female	Left-side	unknow	3	T3	N2	M0	NO	Normal	GSE39582	NO
GSE39582_GSM972304	900	0	60	Female	Left-side	unknow	2	T3	N0	M0	YES	Normal	GSE39582	YES
GSE38832_GSM950450	909.9	0	unknow	unknow	unknow	unknow	3	unknow	unknow	unknow	unknow	unknow	GSE38832	unknow
TCGA_TCGA-AA-3870	912	0	71	Female	Right-side	unknow	4	T3	N2	M1	unknow	unknow	TCGA	unknow
TCGA_TCGA-AA-A00E	913	0	65	Male	Right-side	unknow	2	T3	N0	M0	unknow	unknow	TCGA	unknow
TCGA_TCGA-AA-3861	914	0	72	Male	Right-side	unknow	2	T3	N0	M0	unknow	unknow	TCGA	unknow
TCGA_TCGA-AA-3862	914	0	82	Male	Right-side	unknow	2	T3	N0	M0	unknow	unknow	TCGA	unknow
TCGA_TCGA-CM-5349	915	0	68	Female	Right-side	unknow	2	T3	N0	M0	unknow	unknow	TCGA	unknow
GSE38832_GSM950483	924	0	unknow	unknow	unknow	unknow	1	unknow	unknow	unknow	unknow	unknow	GSE38832	unknow
TCGA_TCGA-A6-5659	926	0	82	Male	Right-side	unknow	1	T2	N0	M0	unknow	unknow	TCGA	unknow
GSE38832_GSM950446	927.9	0	unknow	unknow	unknow	unknow	3	unknow	unknow	unknow	unknow	unknow	GSE38832	unknow
GSE39582_GSM972447	930	0	71	Male	Right-side	unknow	2	T3	N0	M0	NO	Abnormal	GSE39582	NO
GSE39582_GSM972305	930	0	82	Female	Right-side	unknow	3	T4	N2	M0	NO	Abnormal	GSE39582	NO
GSE17536_GSM437143	931.8	1	86	female	unknow	3	2	unknow	unknow	unknow	unknow	unknow	GSE17536	unknow
GSE38832_GSM950472	939.9	0	unknow	unknow	unknow	unknow	1	unknow	unknow	unknow	unknow	unknow	GSE38832	unknow
GSE17536_GSM437225	940.8	0	78	female	unknow	2	3	unknow	unknow	unknow	unknow	unknow	GSE17536	unknow
GSE38832_GSM950453	941.1	0	unknow	unknow	unknow	unknow	2	unknow	unknow	unknow	unknow	unknow	GSE38832	unknow
TCGA_TCGA-AA-3877	943	0	83	Female	Right-side	unknow	1	T1	N0	M0	unknow	unknow	TCGA	unknow
TCGA_TCGA-AA-A01I	943	0	76	Male	Left-side	unknow	1	T2	N0	M0	unknow	unknow	TCGA	unknow
TCGA_TCGA-AA-A01K	943	0	74	Female	Left-side	unknow	3	T3	N2	M0	unknow	unknow	TCGA	unknow
TCGA_TCGA-AA-3858	945	0	67	Male	Left-side	unknow	1	T2	N0	M0	unknow	unknow	TCGA	unknow
TCGA_TCGA-AA-3860	945	0	53	Female	Left-side	unknow	3	T3	N1	M0	unknow	unknow	TCGA	unknow
TCGA_TCGA-A6-2685	948	1	48	Female	Left-side	unknow	2	T3	N0	M0	unknow	unknow	TCGA	unknow
TCGA_TCGA-QG-A5Z2	952	0	61	Male	Right-side	unknow	1	T2	N0	M0	unknow	unknow	TCGA	unknow
GSE17536_GSM437228	957.6	0	79	female	unknow	2	3	unknow	unknow	unknow	unknow	unknow	GSE17536	unknow
GSE39582_GSM972408	960	0	66	Male	Left-side	unknow	2	T3	N0	M0	NO	Normal	GSE39582	YES
GSE39582_GSM972517	960	1	88	Female	Left-side	unknow	2	T3	N0	M0	NO	Normal	GSE39582	NO
GSE39582_GSM972026	960	1	75	Male	Left-side	unknow	3	T3	N2	M0	NO	unknow	GSE39582	YES
GSE39582_GSM972105	960	0	53	Male	Left-side	unknow	3	T2	N3	M0	NO	Normal	GSE39582	YES
GSE39582_GSM972112	960	0	64	Female	Right-side	unknow	3	T3	N2	M0	unknow	unknow	GSE39582	YES
GSE39582_GSM972370	960	1	73	Female	Left-side	unknow	3	T3	N1	M0	NO	Normal	GSE39582	YES
TCGA_TCGA-A6-5666	970	1	78	Male	Left-side	unknow	2	T4	N0	M0	unknow	unknow	TCGA	unknow
TCGA_TCGA-CM-5860	974	0	44	Male	Right-side	unknow	2	T3	N0	M0	unknow	unknow	TCGA	unknow
TCGA_TCGA-A6-2684	976	1	75	Female	Right-side	unknow	1	T2	N0	M0	unknow	unknow	TCGA	unknow
TCGA_TCGA-A6-4107	987	0	57	Female	Right-side	unknow	3	T3	N1	M0	unknow	unknow	TCGA	unknow
GSE39582_GSM972486	990	0	87	Male	Right-side	unknow	2	T3	N0	M0	unknow	Normal	GSE39582	NO
GSE39582_GSM971965	990	0	37.5	Female	Left-side	unknow	2	T3	N0	M0	YES	Normal	GSE39582	NO
GSE39582_GSM972037	990	0	78	Male	Right-side	unknow	2	T4	N0	M0	YES	Normal	GSE39582	NO
GSE39582_GSM972047	990	0	93	Female	Right-side	unknow	2	T3	N0	M0	YES	Normal	GSE39582	NO
GSE39582_GSM972223	990	0	78	Male	Right-side	unknow	2	T3	N0	M0	NO	Abnormal	GSE39582	NO
GSE39582_GSM972372	990	1	59	Male	Right-side	unknow	3	T4	N2	M0	YES	Normal	GSE39582	YES
GSE38832_GSM950532	992.1	0	unknow	unknow	unknow	unknow	2	unknow	unknow	unknow	unknow	unknow	GSE38832	unknow
TCGA_TCGA-A6-3809	996	0	71	Female	Right-side	unknow	2	T4	N0	M0	unknow	unknow	TCGA	unknow
GSE17536_GSM437166	996	0	51	male	unknow	2	2	unknow	unknow	unknow	unknow	unknow	GSE17536	unknow
TCGA_TCGA-A6-5656	1001	0	74	Male	Left-side	unknow	1	T2	N0	M0	unknow	unknow	TCGA	unknow
TCGA_TCGA-QG-A5YX	1003	0	61	Female	Left-side	unknow	2	T3	N0	unknow	unknow	unknow	TCGA	unknow
TCGA_TCGA-AA-3947	1004	0	60	Female	Right-side	unknow	2	T4	N0	M0	unknow	unknow	TCGA	unknow
TCGA_TCGA-AA-3815	1005	0	65	Female	Right-side	unknow	2	T3	N0	M0	unknow	unknow	TCGA	unknow
TCGA_TCGA-AA-A01T	1005	0	63	Female	Left-side	unknow	3	T3	N1	M0	unknow	unknow	TCGA	unknow
TCGA_TCGA-AA-A02W	1005	1	73	Female	Left-side	unknow	1	T2	N0	M0	unknow	unknow	TCGA	unknow
TCGA_TCGA-D5-5538	1007	1	60	Female	Right-side	unknow	3	T3	N1	M0	unknow	unknow	TCGA	unknow
GSE17536_GSM437167	1010.7	0	69	male	unknow	2	2	unknow	unknow	unknow	unknow	unknow	GSE17536	unknow
TCGA_TCGA-G4-6297	1013	1	55	Female	Right-side	unknow	4	T3	N2	M1	unknow	unknow	TCGA	unknow
TCGA_TCGA-A6-3808	1014	0	73	Male	Right-side	unknow	2	T3	N0	M0	unknow	unknow	TCGA	unknow
TCGA_TCGA-A6-5661	1020	0	80	Female	Right-side	unknow	2	T3	N0	M0	unknow	unknow	TCGA	unknow
GSE39582_GSM972457	1020	1	74	Female	Left-side	unknow	3	T3	N1	M0	YES	Normal	GSE39582	YES
GSE39582_GSM972207	1020	1	65	Male	Left-side	unknow	3	T3	N1	M0	NO	Normal	GSE39582	YES
TCGA_TCGA-F4-6808	1024	0	54	Female	Left-side	unknow	1	T1	N0	M0	unknow	unknow	TCGA	unknow
GSE17536_GSM437222	1025.7	1	41	male	unknow	2	3	unknow	unknow	unknow	unknow	unknow	GSE17536	unknow
TCGA_TCGA-AA-3548	1034	0	71	Female	Right-side	unknow	3	T3	N2	M0	unknow	unknow	TCGA	unknow
TCGA_TCGA-AA-3531	1035	0	75	Female	Left-side	unknow	2	T3	N0	M0	unknow	unknow	TCGA	unknow
TCGA_TCGA-AA-A00F	1035	0	66	Male	Left-side	unknow	3	T3	N2	M0	unknow	unknow	TCGA	unknow
TCGA_TCGA-AA-3975	1036	0	80	Male	Left-side	unknow	1	T2	N0	M0	unknow	unknow	TCGA	unknow
TCGA_TCGA-F4-6805	1047	0	58	Female	Left-side	unknow	2	T3	N0	M0	unknow	unknow	TCGA	unknow
GSE38832_GSM950445	1050	0	unknow	unknow	unknow	unknow	1	unknow	unknow	unknow	unknow	unknow	GSE38832	unknow
GSE39582_GSM972445	1050	0	48	Male	Right-side	unknow	2	T4	N0	M0	NO	Normal	GSE39582	NO
GSE39582_GSM971964	1050	0	35.4	Female	Left-side	unknow	3	T2	N2	M0	NO	Normal	GSE39582	NO
GSE39582_GSM972121	1050	0	96	Male	Left-side	unknow	3	T3	N1	M0	YES	Normal	GSE39582	YES
GSE39582_GSM972176	1050	1	85	Female	Right-side	unknow	3	T4	N2	M0	NO	Normal	GSE39582	NO
GSE39582_GSM972288	1050	0	53	Male	Left-side	unknow	4	T4	N1	M1	NO	Normal	GSE39582	YES
TCGA_TCGA-A6-3807	1054	0	53	Female	Left-side	unknow	3	T3	N2	M0	unknow	unknow	TCGA	unknow
TCGA_TCGA-AA-A010	1064	0	46	Female	Right-side	unknow	2	T4	N0	M0	unknow	unknow	TCGA	unknow
TCGA_TCGA-A6-2680	1068	0	72	Female	Right-side	unknow	2	T3	N0	M0	unknow	unknow	TCGA	unknow
TCGA_TCGA-F4-6856	1074	0	45	Male	Right-side	unknow	1	T2	N0	M0	unknow	unknow	TCGA	unknow
GSE17536_GSM437161	1077	0	60	male	unknow	2	2	unknow	unknow	unknow	unknow	unknow	GSE17536	unknow
GSE39582_GSM971976	1080	0	45.2	Female	Left-side	unknow	2	T4	N0	M0	NO	Normal	GSE39582	NO
GSE39582_GSM972029	1080	0	58	Male	Left-side	unknow	3	T4	N2	M0	NO	Normal	GSE39582	YES
GSE39582_GSM972109	1080	0	96	Male	Right-side	unknow	3	T3	N1	M0	NO	Normal	GSE39582	YES
GSE39582_GSM972120	1080	0	96	Female	Right-side	unknow	3	T3	N1	M0	unknow	unknow	GSE39582	YES
GSE39582_GSM972165	1080	1	67	Male	Right-side	unknow	2	T4	N0	M0	NO	unknow	GSE39582	NO
GSE39582_GSM972167	1080	1	47	Male	Left-side	unknow	2	T3	N0	M0	NO	Normal	GSE39582	NO
GSE39582_GSM972318	1080	0	84	Female	Right-side	unknow	2	T3	N0	M0	YES	Normal	GSE39582	NO
TCGA_TCGA-F4-6463	1087	0	51	Male	Right-side	unknow	2	T3	N0	M0	unknow	unknow	TCGA	unknow
TCGA_TCGA-F4-6569	1087	0	60	Male	Right-side	unknow	1	T2	N0	M0	unknow	unknow	TCGA	unknow
TCGA_TCGA-G4-6586	1089	0	73	Female	Right-side	unknow	2	T3	N0	M0	unknow	unknow	TCGA	unknow
TCGA_TCGA-DM-A28F	1094	0	73	Male	Left-side	unknow	3	T3	N1	M0	NO	Normal	TCGA	unknow
TCGA_TCGA-AA-3524	1096	0	85	Male	Left-side	unknow	2	T3	N0	M0	unknow	unknow	TCGA	unknow
TCGA_TCGA-AA-3854	1096	0	71	Female	Left-side	unknow	1	T2	N0	M0	unknow	unknow	TCGA	unknow
TCGA_TCGA-AA-3970	1096	0	65	Male	Left-side	unknow	2	T3	N0	M0	unknow	unknow	TCGA	unknow
GSE17536_GSM437158	1102.5	0	76	female	unknow	2	2	unknow	unknow	unknow	unknow	unknow	GSE17536	unknow
GSE17536_GSM437201	1107.6	1	64	female	unknow	2	3	unknow	unknow	unknow	unknow	unknow	GSE17536	unknow
GSE17536_GSM437216	1107.6	0	67	male	unknow	3	3	unknow	unknow	unknow	unknow	unknow	GSE17536	unknow
GSE38832_GSM950467	1110	0	unknow	unknow	unknow	unknow	1	unknow	unknow	unknow	unknow	unknow	GSE38832	unknow
GSE39582_GSM972024	1110	1	62	Male	Left-side	unknow	3	T2	N2	M0	NO	Normal	GSE39582	YES
GSE39582_GSM972225	1110	0	51	Male	Left-side	unknow	2	T3	N0	M0	NO	Normal	GSE39582	YES
GSE39582_GSM972286	1110	0	24	Male	Right-side	unknow	2	T3	N0	M0	YES	Normal	GSE39582	NO
GSE39582_GSM972373	1110	1	66	Male	Right-side	unknow	3	T3	N1	M0	NO	Normal	GSE39582	YES
GSE39582_GSM972382	1110	1	58	Male	Right-side	unknow	2	T3	N0	M0	YES	Normal	GSE39582	NO
TCGA_TCGA-A6-3810	1111	0	62	Male	Left-side	unknow	2	T3	N0	M0	unknow	unknow	TCGA	unknow
GSE38832_GSM950461	1115.1	0	unknow	unknow	unknow	unknow	2	unknow	unknow	unknow	unknow	unknow	GSE38832	unknow
GSE17536_GSM437133	1119.3	1	75	female	unknow	1	2	unknow	unknow	unknow	unknow	unknow	GSE17536	unknow
GSE17536_GSM437144	1119.3	0	71	male	unknow	2	2	unknow	unknow	unknow	unknow	unknow	GSE17536	unknow
TCGA_TCGA-AA-3841	1124	0	66	Male	Left-side	unknow	2	T3	N0	M0	unknow	unknow	TCGA	unknow
TCGA_TCGA-AA-A01Z	1126	1	68	Male	Right-side	unknow	2	T3	N0	M0	unknow	unknow	TCGA	unknow
TCGA_TCGA-CM-4746	1126	0	61	Male	Left-side	unknow	1	T2	N0	M0	unknow	unknow	TCGA	unknow
TCGA_TCGA-AA-3495	1127	0	79	Male	Right-side	unknow	1	T2	N0	M0	unknow	unknow	TCGA	unknow
TCGA_TCGA-AA-3522	1127	0	67	Male	Right-side	unknow	2	T3	N0	M0	unknow	unknow	TCGA	unknow
TCGA_TCGA-AA-3685	1127	0	69	Male	Left-side	unknow	2	T3	N0	M0	unknow	unknow	TCGA	unknow
TCGA_TCGA-F4-6806	1132	1	59	Female	Left-side	unknow	1	T2	N0	M0	unknow	unknow	TCGA	unknow
GSE39582_GSM972139	1140	1	69	Female	Left-side	unknow	3	T3	N1	M0	NO	unknow	GSE39582	YES
GSE17536_GSM437220	1142.1	0	60	female	unknow	2	3	unknow	unknow	unknow	unknow	unknow	GSE17536	unknow
TCGA_TCGA-A6-2681	1150	1	73	Female	Right-side	unknow	2	T3	N0	M0	unknow	unknow	TCGA	unknow
TCGA_TCGA-AA-A00L	1157	0	66	Male	Right-side	unknow	2	T3	N0	M0	unknow	unknow	TCGA	unknow
GSE17536_GSM437205	1161.6	0	73	female	unknow	2	3	unknow	unknow	unknow	unknow	unknow	GSE17536	unknow
GSE39582_GSM972035	1170	0	94	Female	Right-side	unknow	2	T3	N0	M0	NO	Normal	GSE39582	NO
GSE39582_GSM972160	1170	1	73	Male	Left-side	unknow	2	T3	N0	M0	NO	unknow	GSE39582	NO
GSE39582_GSM972290	1170	0	70	Female	Left-side	unknow	1	T2	N0	M0	NO	Normal	GSE39582	NO
GSE17536_GSM437157	1177.5	0	59	female	unknow	3	2	unknow	unknow	unknow	unknow	unknow	GSE17536	unknow
TCGA_TCGA-AA-3837	1186	0	67	Male	Right-side	unknow	2	T3	N0	M0	unknow	unknow	TCGA	unknow
TCGA_TCGA-G4-6311	1199	0	80	Male	Right-side	unknow	3	T3	N1	unknow	unknow	unknow	TCGA	unknow
GSE38832_GSM950489	1202.1	0	unknow	unknow	unknow	unknow	1	unknow	unknow	unknow	unknow	unknow	GSE38832	unknow
GSE38832_GSM950462	1214.1	0	unknow	unknow	unknow	unknow	2	unknow	unknow	unknow	unknow	unknow	GSE38832	unknow
TCGA_TCGA-A6-2671	1215	1	85	Male	Left-side	unknow	4	T3	N2	M1	unknow	unknow	TCGA	unknow
TCGA_TCGA-AA-3972	1216	1	72	Male	Left-side	unknow	4	T3	N1	M1	unknow	unknow	TCGA	unknow
TCGA_TCGA-AA-A02F	1216	0	68	Female	Left-side	unknow	4	T3	N1	M1	unknow	unknow	TCGA	unknow
TCGA_TCGA-AA-A02Y	1216	0	73	Male	Right-side	unknow	1	T2	N0	M0	unknow	unknow	TCGA	unknow
TCGA_TCGA-A6-2674	1219	1	71	Male	Left-side	unknow	4	T3	N2	M1	unknow	unknow	TCGA	unknow
GSE38832_GSM950425	1230	0	unknow	unknow	unknow	unknow	3	unknow	unknow	unknow	unknow	unknow	GSE38832	unknow
GSE39582_GSM972104	1230	0	72	Female	Right-side	unknow	3	T3	N3	M0	YES	Normal	GSE39582	YES
GSE39582_GSM972163	1230	0	71	Male	Left-side	unknow	2	T4	N0	M0	NO	unknow	GSE39582	YES
GSE39582_GSM972299	1230	0	54	Female	Left-side	unknow	4	T4	N2	M1	NO	Normal	GSE39582	YES
GSE39582_GSM972300	1230	0	75	Male	Right-side	unknow	0	T1	N0	M0	YES	Normal	GSE39582	NO
GSE39582_GSM972337	1230	0	80	Female	Right-side	unknow	3	T3	N1	M0	NO	Abnormal	GSE39582	NO
GSE39582_GSM972345	1230	1	83	Male	Right-side	unknow	3	T3	N2	M0	YES	Normal	GSE39582	NO
GSE17536_GSM437200	1231.8	1	69	male	unknow	2	3	unknow	unknow	unknow	unknow	unknow	GSE17536	unknow
GSE38832_GSM950424	1244.1	0	unknow	unknow	unknow	unknow	3	unknow	unknow	unknow	unknow	unknow	GSE38832	unknow
GSE38832_GSM950438	1245.9	1	unknow	unknow	unknow	unknow	3	unknow	unknow	unknow	unknow	unknow	GSE38832	unknow
TCGA_TCGA-AA-A03J	1246	0	65	Female	Left-side	unknow	1	T2	N0	M0	unknow	unknow	TCGA	unknow
GSE39582_GSM972482	1260	0	90	Female	Right-side	unknow	2	T3	N0	M0	YES	Normal	GSE39582	NO
GSE39582_GSM972507	1260	0	83	Female	Right-side	unknow	3	T3	N1	M0	NO	Abnormal	GSE39582	NO
GSE39582_GSM971982	1260	0	79.3	Male	Right-side	unknow	3	T4	N2	M0	YES	Normal	GSE39582	NO
GSE39582_GSM972044	1260	0	58	Male	Right-side	unknow	2	T4	N0	M0	NO	Normal	GSE39582	YES
GSE39582_GSM972357	1260	0	88	Female	Left-side	unknow	2	T3	N0	M0	NO	Normal	GSE39582	NO
TCGA_TCGA-AA-A00Q	1278	0	66	Female	Left-side	unknow	3	T4	N1	M0	unknow	unknow	TCGA	unknow
TCGA_TCGA-A6-2678	1286	0	43	Female	Right-side	unknow	3	T3	N1	M0	unknow	unknow	TCGA	unknow
GSE38832_GSM950474	1286.1	0	unknow	unknow	unknow	unknow	2	unknow	unknow	unknow	unknow	unknow	GSE38832	unknow
GSE39582_GSM971994	1290	0	80.9	Male	Right-side	unknow	2	T3	N0	M0	NO	Normal	GSE39582	NO
GSE39582_GSM972013	1290	0	89.4	Female	Left-side	unknow	4	T2	N1	M1	NO	Normal	GSE39582	NO
GSE39582_GSM972017	1290	0	73	Female	Right-side	unknow	3	T3	N2	M0	YES	Normal	GSE39582	YES
GSE39582_GSM972061	1290	0	78	Female	Left-side	unknow	2	T4	N0	M0	NO	Normal	GSE39582	NO
GSE39582_GSM972086	1290	0	81	Male	Left-side	unknow	2	T3	N0	M0	NO	Normal	GSE39582	NO
GSE39582_GSM972276	1290	0	59	Male	Right-side	unknow	3	T3	N2	M0	YES	Normal	GSE39582	YES
GSE39582_GSM972287	1290	0	77	Male	Right-side	unknow	2	T3	N0	M0	NO	Normal	GSE39582	NO
GSE39582_GSM972391	1290	1	68	Male	Right-side	unknow	2	T3	N0	M0	NO	Abnormal	GSE39582	NO
TCGA_TCGA-QG-A5YV	1301	0	64	Female	Left-side	unknow	3	T4	N1	unknow	unknow	unknow	TCGA	unknow
TCGA_TCGA-F4-6807	1309	0	51	Female	Right-side	unknow	3	T3	N2	M0	unknow	unknow	TCGA	unknow
GSE17536_GSM437112	1313.7	0	86	female	unknow	2	1	unknow	unknow	unknow	unknow	unknow	GSE17536	unknow
GSE38832_GSM950419	1314.9	0	unknow	unknow	unknow	unknow	3	unknow	unknow	unknow	unknow	unknow	GSE38832	unknow
TCGA_TCGA-D5-6534	1316	0	62	Female	Right-side	unknow	2	T3	N0	M0	unknow	unknow	TCGA	unknow
GSE39582_GSM972075	1320	0	42	Male	Left-side	unknow	2	T4	N0	M0	NO	Normal	GSE39582	NO
TCGA_TCGA-A6-2675	1321	0	78	Male	Left-side	unknow	2	T3	N0	unknow	unknow	unknow	TCGA	unknow
GSE17536_GSM437215	1340.1	0	67	male	unknow	2	3	unknow	unknow	unknow	unknow	unknow	GSE17536	unknow
GSE38832_GSM950492	1341	0	unknow	unknow	unknow	unknow	3	unknow	unknow	unknow	unknow	unknow	GSE38832	unknow
GSE17536_GSM437221	1342.2	0	46	male	unknow	2	3	unknow	unknow	unknow	unknow	unknow	GSE17536	unknow
TCGA_TCGA-DM-A1DB	1348	0	68	Male	Left-side	unknow	2	T3	N0	M0	NO	Normal	TCGA	unknow
GSE17536_GSM437160	1349.1	0	58	male	unknow	2	2	unknow	unknow	unknow	unknow	unknow	GSE17536	unknow
GSE39582_GSM972473	1350	1	67	Male	Left-side	unknow	2	T3	N0	M0	YES	Normal	GSE39582	NO
GSE39582_GSM972091	1350	1	67	Male	Left-side	unknow	2	T3	N0	M0	YES	Normal	GSE39582	NO
GSE39582_GSM972138	1350	1	77	Male	Left-side	unknow	2	T3	N0	M0	NO	unknow	GSE39582	NO
GSE39582_GSM972278	1350	0	72	Female	Right-side	unknow	1	T2	N0	M0	NO	Abnormal	GSE39582	NO
TCGA_TCGA-A6-2679	1366	0	73	Female	Right-side	unknow	2	T3	N0	unknow	unknow	unknow	TCGA	unknow
GSE17536_GSM437153	1379.7	0	68	male	unknow	2	2	unknow	unknow	unknow	unknow	unknow	GSE17536	unknow
GSE39582_GSM971973	1380	0	24.9	Male	Left-side	unknow	2	T3	N0	M0	NO	Normal	GSE39582	NO
GSE39582_GSM971975	1380	0	41.9	Female	Left-side	unknow	2	T3	N0	M0	NO	Normal	GSE39582	NO
GSE39582_GSM972065	1380	0	48	Male	Left-side	unknow	2	T3	N0	M0	NO	Normal	GSE39582	YES
GSE39582_GSM972102	1380	0	22	Male	Left-side	unknow	3	T3	N1	M0	unknow	unknow	GSE39582	YES
GSE39582_GSM972114	1380	0	73	Male	Right-side	unknow	3	T3	N1	M0	NO	Abnormal	GSE39582	YES
GSE39582_GSM972280	1380	0	79	Female	Right-side	unknow	2	T4	N0	M0	YES	Normal	GSE39582	NO
GSE39582_GSM972297	1380	0	77	Male	Right-side	unknow	1	T1	N0	M0	YES	Normal	GSE39582	NO
GSE39582_GSM972314	1380	0	86	Female	Right-side	unknow	3	T3	N1	M0	NO	Abnormal	GSE39582	NO
GSE39582_GSM972335	1380	0	73	Male	Left-side	unknow	1	T2	N0	M0	NO	Normal	GSE39582	NO
GSE38832_GSM950430	1386	0	unknow	unknow	unknow	unknow	2	unknow	unknow	unknow	unknow	unknow	GSE38832	unknow
GSE17536_GSM437152	1401.3	0	48	female	unknow	2	2	unknow	unknow	unknow	unknow	unknow	GSE17536	unknow
GSE39582_GSM972511	1410	0	75	Male	Right-side	unknow	3	T3	N2	M0	NO	Normal	GSE39582	YES
GSE39582_GSM972092	1410	0	76	Female	Left-side	unknow	2	T3	N0	M0	YES	Normal	GSE39582	NO
GSE39582_GSM972215	1410	0	73	Female	Right-side	unknow	3	T4	N2	M0	YES	Normal	GSE39582	YES
GSE39582_GSM972365	1410	0	59	Female	Right-side	unknow	3	T3	N2	M0	YES	Normal	GSE39582	YES
TCGA_TCGA-AA-3678	1430	0	60	Female	Left-side	unknow	3	T2	N1	M0	unknow	unknow	TCGA	unknow
TCGA_TCGA-AA-3675	1431	0	84	Male	Right-side	unknow	2	T3	N0	M0	unknow	unknow	TCGA	unknow
GSE17536_GSM437196	1434	0	30	male	unknow	3	3	unknow	unknow	unknow	unknow	unknow	GSE17536	unknow
GSE17536_GSM437151	1435.8	0	56	male	unknow	2	2	unknow	unknow	unknow	unknow	unknow	GSE17536	unknow
GSE39582_GSM972404	1440	0	68	Male	Left-side	unknow	2	T3	N0	M0	NO	Normal	GSE39582	NO
GSE39582_GSM972443	1440	0	49	Male	Left-side	unknow	2	T3	N0	M0	NO	Normal	GSE39582	NO
GSE39582_GSM971981	1440	0	81.8	Male	Right-side	unknow	2	T3	N0	M0	YES	Normal	GSE39582	NO
GSE39582_GSM972268	1440	0	67	Male	Left-side	unknow	3	T2	N1	M0	YES	Normal	GSE39582	YES
GSE39582_GSM972340	1440	1	75	Male	Left-side	unknow	2	T3	N0	M0	NO	Normal	GSE39582	NO
TCGA_TCGA-F4-6855	1442	0	70	Female	Left-side	unknow	2	T3	N0	M0	unknow	unknow	TCGA	unknow
TCGA_TCGA-F4-6703	1456	0	64	Male	Right-side	unknow	2	T3	N0	M0	unknow	unknow	TCGA	unknow
TCGA_TCGA-CK-5912	1466	0	81	Male	Right-side	unknow	1	T2	N0	unknow	unknow	unknow	TCGA	unknow
GSE39582_GSM972488	1470	0	65	Male	Right-side	unknow	2	T3	N0	M0	YES	Normal	GSE39582	NO
GSE39582_GSM971977	1470	0	40.8	Female	Right-side	unknow	3	T4	N1	M0	YES	Normal	GSE39582	NO
GSE17536_GSM437219	1473.3	0	71	female	unknow	2	3	unknow	unknow	unknow	unknow	unknow	GSE17536	unknow
GSE38832_GSM950503	1485	0	unknow	unknow	unknow	unknow	1	unknow	unknow	unknow	unknow	unknow	GSE38832	unknow
GSE17536_GSM437154	1495.2	0	71	male	unknow	2	2	unknow	unknow	unknow	unknow	unknow	GSE17536	unknow
GSE39582_GSM972033	1500	0	45	Female	Left-side	unknow	2	T4	N0	M0	unknow	unknow	GSE39582	NO
GSE39582_GSM972034	1500	0	77	Male	Right-side	unknow	2	T3	N0	M0	YES	Normal	GSE39582	NO
GSE39582_GSM972036	1500	0	47	Female	Right-side	unknow	2	T4	N0	M0	unknow	unknow	GSE39582	NO
GSE39582_GSM972197	1500	0	78	Female	Right-side	unknow	2	T3	N0	M0	NO	Abnormal	GSE39582	NO
GSE39582_GSM972293	1500	0	unknow	Male	Right-side	unknow	1	T2	N0	M0	YES	Normal	GSE39582	NO
GSE39582_GSM972336	1500	0	63	Male	Left-side	unknow	3	T3	N1	M0	NO	Normal	GSE39582	YES
GSE17536_GSM437111	1503	0	71	male	unknow	2	1	unknow	unknow	unknow	unknow	unknow	GSE17536	unknow
GSE38832_GSM950514	1505.1	0	unknow	unknow	unknow	unknow	3	unknow	unknow	unknow	unknow	unknow	GSE38832	unknow
GSE17536_GSM437217	1512.9	0	26	male	unknow	2	3	unknow	unknow	unknow	unknow	unknow	GSE17536	unknow
GSE17536_GSM437249	1515.9	0	59	male	unknow	2	4	unknow	unknow	unknow	unknow	unknow	GSE17536	unknow
TCGA_TCGA-AD-6889	1516	1	76	Male	Right-side	unknow	2	T3	N0	M0	unknow	unknow	TCGA	unknow
GSE17536_GSM437203	1517.7	0	67	female	unknow	3	3	unknow	unknow	unknow	unknow	unknow	GSE17536	unknow
TCGA_TCGA-AA-3673	1522	0	53	Female	Right-side	unknow	2	T3	N0	M0	unknow	unknow	TCGA	unknow
GSE39582_GSM972042	1530	0	83	Male	Right-side	unknow	2	T3	N0	M0	YES	Normal	GSE39582	NO
GSE39582_GSM972277	1530	0	88	Female	Right-side	unknow	2	T4	N0	M0	NO	Abnormal	GSE39582	NO
GSE39582_GSM972282	1530	0	79	Female	Left-side	unknow	1	T2	N0	M0	YES	Normal	GSE39582	NO
GSE39582_GSM972283	1530	0	65	Male	Right-side	unknow	2	T3	N0	M0	NO	Normal	GSE39582	NO
GSE39582_GSM972440	1560	0	50	Male	Left-side	unknow	2	T3	N0	M0	YES	Normal	GSE39582	YES
GSE39582_GSM972030	1560	0	68	Female	Right-side	unknow	3	T3	N3	M0	NO	Abnormal	GSE39582	YES
GSE39582_GSM972279	1560	0	67	Female	Right-side	unknow	3	T3	N1	M0	NO	Abnormal	GSE39582	YES
GSE39582_GSM972343	1560	0	86	Male	Right-side	unknow	2	T3	N0	M0	YES	Normal	GSE39582	NO
TCGA_TCGA-CK-5913	1561	0	58	Female	Right-side	unknow	2	T3	N0	unknow	unknow	Normal	TCGA	unknow
GSE38832_GSM950517	1562.1	0	unknow	unknow	unknow	unknow	3	unknow	unknow	unknow	unknow	unknow	GSE38832	unknow
GSE17536_GSM437148	1564.2	0	65	female	unknow	2	2	unknow	unknow	unknow	unknow	unknow	GSE17536	unknow
GSE17536_GSM437107	1567.2	0	76	male	unknow	1	1	unknow	unknow	unknow	unknow	unknow	GSE17536	unknow
GSE17536_GSM437126	1575	0	76	female	unknow	2	2	unknow	unknow	unknow	unknow	unknow	GSE17536	unknow
TCGA_TCGA-AA-A029	1581	0	67	Male	Right-side	unknow	2	T3	N0	M0	unknow	unknow	TCGA	unknow
GSE17536_GSM437213	1585.8	0	72	male	unknow	3	3	unknow	unknow	unknow	unknow	unknow	GSE17536	unknow
GSE39582_GSM972414	1590	0	52	Female	Left-side	unknow	2	T3	N0	M0	NO	Normal	GSE39582	NO
GSE39582_GSM972427	1590	0	63	Male	Left-side	unknow	2	T3	N0	M0	NO	Normal	GSE39582	NO
GSE39582_GSM972430	1590	0	43	Female	Right-side	unknow	2	T3	N0	M0	NO	Normal	GSE39582	YES
GSE39582_GSM971979	1590	0	66.4	Female	Right-side	unknow	2	T3	N0	M0	NO	Normal	GSE39582	NO
GSE39582_GSM972025	1590	0	49	Male	Left-side	unknow	3	T3	N2	M0	NO	Normal	GSE39582	YES
GSE39582_GSM972080	1590	1	61	Male	Left-side	unknow	2	T4	N0	M0	YES	Normal	GSE39582	YES
GSE39582_GSM972202	1590	0	57	Female	Left-side	unknow	3	T3	N1	M0	NO	Normal	GSE39582	YES
GSE39582_GSM972325	1590	1	55	Male	Right-side	unknow	3	T3	N1	M0	YES	Normal	GSE39582	NO
GSE38832_GSM950490	1590.9	0	unknow	unknow	unknow	unknow	2	unknow	unknow	unknow	unknow	unknow	GSE38832	unknow
TCGA_TCGA-AA-3864	1612	0	71	Male	Right-side	unknow	2	T3	N0	M0	unknow	unknow	TCGA	unknow
GSE38832_GSM950426	1620	0	unknow	unknow	unknow	unknow	3	unknow	unknow	unknow	unknow	unknow	GSE38832	unknow
GSE39582_GSM972431	1620	0	59	Male	Right-side	unknow	3	T3	N1	M0	YES	Normal	GSE39582	YES
GSE39582_GSM972078	1620	1	63	Male	Left-side	unknow	2	T3	N0	M0	NO	Normal	GSE39582	YES
GSE39582_GSM972200	1620	0	61	Male	Left-side	unknow	2	T3	N0	M0	NO	Normal	GSE39582	NO
GSE39582_GSM972203	1620	0	66	Female	Left-side	unknow	3	T3	N2	M0	NO	Normal	GSE39582	YES
GSE38832_GSM950509	1625.1	0	unknow	unknow	unknow	unknow	3	unknow	unknow	unknow	unknow	unknow	GSE38832	unknow
GSE38832_GSM950443	1634.1	0	unknow	unknow	unknow	unknow	1	unknow	unknow	unknow	unknow	unknow	GSE38832	unknow
GSE38832_GSM950436	1641	0	unknow	unknow	unknow	unknow	3	unknow	unknow	unknow	unknow	unknow	GSE38832	unknow
GSE17536_GSM437206	1647	0	83	female	unknow	2	3	unknow	unknow	unknow	unknow	unknow	GSE17536	unknow
GSE39582_GSM972428	1650	0	62	Male	Left-side	unknow	3	T3	N2	M0	NO	Normal	GSE39582	YES
GSE39582_GSM971991	1650	0	71.3	Male	Left-side	unknow	2	T3	N0	M0	NO	Normal	GSE39582	NO
GSE39582_GSM972031	1650	0	81	Male	Left-side	unknow	2	T3	N0	M0	unknow	unknow	GSE39582	NO
GSE39582_GSM972041	1650	0	78	Male	Left-side	unknow	2	T3	N0	M0	YES	Normal	GSE39582	NO
GSE39582_GSM972130	1650	0	76	Male	Left-side	unknow	2	T4	N0	M0	NO	Normal	GSE39582	NO
GSE38832_GSM950475	1653	0	unknow	unknow	unknow	unknow	1	unknow	unknow	unknow	unknow	unknow	GSE38832	unknow
GSE17536_GSM437109	1653.9	0	74	female	unknow	2	1	unknow	unknow	unknow	unknow	unknow	GSE17536	unknow
GSE17536_GSM437255	1655.7	0	58	female	unknow	2	4	unknow	unknow	unknow	unknow	unknow	GSE17536	unknow
GSE17536_GSM437118	1659.9	0	77	female	unknow	3	2	unknow	unknow	unknow	unknow	unknow	GSE17536	unknow
TCGA_TCGA-G4-6307	1674	0	37	Female	Left-side	unknow	3	T3	N1	M0	unknow	unknow	TCGA	unknow
GSE17536_GSM437135	1677.6	0	74	female	unknow	2	2	unknow	unknow	unknow	unknow	unknow	GSE17536	unknow
TCGA_TCGA-A6-A56B	1678	1	57	Male	Left-side	unknow	3	T3	N1	M0	unknow	unknow	TCGA	unknow
GSE39582_GSM972403	1680	0	70	Female	Right-side	unknow	2	T3	N0	M0	YES	Normal	GSE39582	NO
GSE39582_GSM971974	1680	0	40.7	Female	Left-side	unknow	4	T4	N1	M1	YES	Normal	GSE39582	NO
GSE39582_GSM971993	1680	0	67.5	Male	Left-side	unknow	2	T3	N0	M0	YES	Normal	GSE39582	NO
GSE39582_GSM972140	1680	1	64	Male	Left-side	unknow	2	T4	N0	M0	YES	unknow	GSE39582	NO
GSE39582_GSM972152	1680	0	70	Female	Right-side	unknow	3	T3	N1	M0	YES	unknow	GSE39582	YES
GSE39582_GSM972281	1680	0	64	Male	Left-side	unknow	1	T1	N0	M0	NO	Normal	GSE39582	NO
GSE39582_GSM972306	1680	0	70	Male	Left-side	unknow	2	T3	N0	M0	NO	Normal	GSE39582	YES
GSE38832_GSM950481	1692	0	unknow	unknow	unknow	unknow	2	unknow	unknow	unknow	unknow	unknow	GSE38832	unknow
TCGA_TCGA-D5-5541	1701	0	63	Male	Left-side	unknow	3	T3	N1	M0	unknow	unknow	TCGA	unknow
TCGA_TCGA-D5-5540	1706	0	73	Male	Right-side	unknow	2	T3	N0	M0	unknow	unknow	TCGA	unknow
GSE39582_GSM972494	1710	0	43	Female	Left-side	unknow	1	T2	N0	M0	NO	Normal	GSE39582	NO
GSE39582_GSM972198	1710	0	52	Female	Left-side	unknow	3	T3	N1	M0	YES	Normal	GSE39582	YES
GSE39582_GSM972211	1710	0	65	Male	Left-side	unknow	3	T3	N1	M0	NO	Normal	GSE39582	YES
GSE39582_GSM972222	1710	0	69	Female	Right-side	unknow	2	T3	N0	M0	NO	Normal	GSE39582	NO
GSE39582_GSM972274	1710	0	91	Female	Right-side	unknow	3	T4	N2	M0	NO	Abnormal	GSE39582	NO
GSE38832_GSM950439	1716	0	unknow	unknow	unknow	unknow	3	unknow	unknow	unknow	unknow	unknow	GSE38832	unknow
GSE17536_GSM437110	1733.7	0	55	male	unknow	2	1	unknow	unknow	unknow	unknow	unknow	GSE17536	unknow
GSE17536_GSM437208	1753.5	0	63	female	unknow	2	3	unknow	unknow	unknow	unknow	unknow	GSE17536	unknow
GSE39582_GSM972425	1770	0	72	Female	Right-side	unknow	3	T3	N1	M0	YES	Normal	GSE39582	YES
GSE39582_GSM972493	1770	0	89	Female	Right-side	unknow	2	T3	N0	M0	YES	Normal	GSE39582	NO
GSE39582_GSM971980	1770	0	76.9	Male	Right-side	unknow	3	T4	N1	M0	NO	Abnormal	GSE39582	NO
GSE39582_GSM972059	1770	0	76	Female	Left-side	unknow	2	T3	N0	M0	NO	Abnormal	GSE39582	NO
GSE38832_GSM950476	1770.9	0	unknow	unknow	unknow	unknow	1	unknow	unknow	unknow	unknow	unknow	GSE38832	unknow
GSE17536_GSM437195	1772.1	0	87	male	unknow	2	3	unknow	unknow	unknow	unknow	unknow	GSE17536	unknow
TCGA_TCGA-AZ-4315	1776	0	61	Male	Right-side	unknow	2	T3	N0	M0	unknow	unknow	TCGA	unknow
GSE17536_GSM437209	1780.2	0	69	male	unknow	3	3	unknow	unknow	unknow	unknow	unknow	GSE17536	unknow
GSE17536_GSM437097	1785.9	0	50	male	unknow	2	1	unknow	unknow	unknow	unknow	unknow	GSE17536	unknow
GSE17536_GSM437149	1788	0	74	female	unknow	2	2	unknow	unknow	unknow	unknow	unknow	GSE17536	unknow
GSE17536_GSM437150	1798.8	0	67	male	unknow	1	2	unknow	unknow	unknow	unknow	unknow	GSE17536	unknow
GSE38832_GSM950433	1800	1	unknow	unknow	unknow	unknow	3	unknow	unknow	unknow	unknow	unknow	GSE38832	unknow
GSE39582_GSM972032	1800	0	64	Female	Right-side	unknow	2	T3	N0	M0	NO	Normal	GSE39582	NO
GSE39582_GSM972058	1800	0	75	Female	Right-side	unknow	2	T3	N0	M0	NO	Abnormal	GSE39582	NO
GSE39582_GSM972107	1800	0	76	Male	Left-side	unknow	3	T3	N1	M0	NO	Normal	GSE39582	YES
GSE39582_GSM972265	1800	0	78	Female	Right-side	unknow	3	T3	N1	M0	NO	Abnormal	GSE39582	YES
TCGA_TCGA-SS-A7HO	1801	1	44	Female	Right-side	unknow	2	T4	N0	M0	unknow	unknow	TCGA	unknow
GSE39582_GSM972094	1830	0	67	Female	Right-side	unknow	2	T3	N0	M0	YES	Normal	GSE39582	NO
GSE39582_GSM972132	1830	0	87	Female	Left-side	unknow	2	T3	N0	M0	YES	Normal	GSE39582	NO
GSE39582_GSM972136	1830	1	54	Male	Left-side	unknow	3	T3	N1	M0	NO	Normal	GSE39582	YES
GSE39582_GSM972295	1830	0	68	Male	Right-side	unknow	3	T4	N1	M0	YES	Normal	GSE39582	YES
TCGA_TCGA-DM-A28G	1849	0	75	Male	Right-side	unknow	2	T3	N0	M0	NO	Normal	TCGA	unknow
TCGA_TCGA-AA-3655	1856	0	68	Male	Left-side	unknow	2	T3	N0	M0	unknow	unknow	TCGA	unknow
GSE39582_GSM972429	1860	0	64	Male	Left-side	unknow	3	T4	N2	M0	YES	Normal	GSE39582	YES
GSE39582_GSM972520	1860	0	76	Male	Left-side	unknow	3	T3	N1	M0	NO	Normal	GSE39582	YES
GSE39582_GSM972348	1860	0	60	Male	Left-side	unknow	2	T3	N0	M0	YES	Normal	GSE39582	YES
TCGA_TCGA-G4-6315	1883	0	66	Male	Left-side	unknow	4	T3	N1	M1	NO	unknow	TCGA	unknow
GSE39582_GSM971966	1890	0	40.5	Female	Left-side	unknow	3	T3	N1	M0	YES	Normal	GSE39582	NO
GSE39582_GSM971969	1890	0	30.2	Male	Left-side	unknow	1	T1	N0	M0	NO	Normal	GSE39582	NO
GSE39582_GSM972040	1890	0	81	Male	Left-side	unknow	2	T3	N0	M0	NO	Normal	GSE39582	NO
GSE39582_GSM972126	1890	0	61	Male	Left-side	unknow	2	T3	N0	M0	unknow	unknow	GSE39582	NO
GSE39582_GSM972385	1890	0	70	Male	Left-side	unknow	2	T3	N0	M0	NO	Normal	GSE39582	NO
GSE17536_GSM437146	1897.5	0	76	male	unknow	2	2	unknow	unknow	unknow	unknow	unknow	GSE17536	unknow
GSE38832_GSM950460	1905.9	0	unknow	unknow	unknow	unknow	2	unknow	unknow	unknow	unknow	unknow	GSE38832	unknow
TCGA_TCGA-AA-3509	1915	0	54	Female	Left-side	unknow	2	T3	N0	M0	unknow	unknow	TCGA	unknow
TCGA_TCGA-DM-A1D4	1920	1	80	Male	Right-side	unknow	2	T3	N0	M0	unknow	Normal	TCGA	unknow
GSE39582_GSM972476	1920	0	61	Male	Left-side	unknow	3	T4	N1	M0	NO	Normal	GSE39582	YES
GSE39582_GSM972398	1920	0	65	Male	Left-side	unknow	2	T3	N0	M0	NO	Normal	GSE39582	NO
GSE17536_GSM437108	1923	0	87	female	unknow	2	1	unknow	unknow	unknow	unknow	unknow	GSE17536	unknow
TCGA_TCGA-DM-A28C	1929	1	74	Male	Left-side	unknow	2	T3	N0	M0	unknow	unknow	TCGA	unknow
GSE17536_GSM437192	1929.9	0	63	male	unknow	2	3	unknow	unknow	unknow	unknow	unknow	GSE17536	unknow
TCGA_TCGA-G4-6310	1935	0	69	Male	Right-side	unknow	3	T3	N1	M0	unknow	unknow	TCGA	unknow
GSE17536_GSM437129	1945.8	0	49	male	unknow	2	2	unknow	unknow	unknow	unknow	unknow	GSE17536	unknow
TCGA_TCGA-AA-3510	1946	0	70	Male	Right-side	unknow	2	T3	N0	M0	unknow	unknow	TCGA	unknow
GSE17536_GSM437202	1947.9	0	62	male	unknow	3	3	unknow	unknow	unknow	unknow	unknow	GSE17536	unknow
GSE39582_GSM972481	1950	0	67	Male	Left-side	unknow	3	T3	N2	M0	NO	Normal	GSE39582	YES
GSE39582_GSM971971	1950	0	34.7	Female	Right-side	unknow	4	T4	N2	M1	YES	Normal	GSE39582	NO
GSE39582_GSM972221	1950	0	75	Female	Right-side	unknow	2	T3	N0	M0	NO	Abnormal	GSE39582	NO
GSE39582_GSM972270	1950	0	75	Female	Right-side	unknow	2	T4	N0	M0	NO	Abnormal	GSE39582	NO
GSE17536_GSM437207	1966.5	0	65	female	unknow	2	3	unknow	unknow	unknow	unknow	unknow	GSE17536	unknow
GSE17536_GSM437101	1976.4	0	88	male	unknow	2	1	unknow	unknow	unknow	unknow	unknow	GSE17536	unknow
GSE39582_GSM972516	1980	0	82	Male	Left-side	unknow	2	T3	N0	M0	YES	Normal	GSE39582	NO
GSE39582_GSM972146	1980	0	60	Male	Left-side	unknow	3	T3	N2	M0	YES	unknow	GSE39582	YES
GSE39582_GSM972153	1980	0	71	Male	Left-side	unknow	2	T3	N0	M0	NO	Normal	GSE39582	NO
GSE39582_GSM972199	1980	0	73	Male	Left-side	unknow	3	T3	N2	M0	NO	Normal	GSE39582	YES
GSE39582_GSM972322	1980	1	46	Male	Left-side	unknow	2	T3	N0	M0	YES	Normal	GSE39582	YES
GSE39582_GSM972487	2010	0	84	Male	Left-side	unknow	2	T3	N0	M0	YES	Normal	GSE39582	NO
GSE39582_GSM972095	2010	0	50	Male	Left-side	unknow	2	T3	N0	M0	YES	Normal	GSE39582	NO
GSE39582_GSM972201	2010	0	78	Male	Right-side	unknow	3	T3	N2	M0	NO	Normal	GSE39582	YES
GSE39582_GSM972267	2010	0	82	Male	Left-side	unknow	2	T3	N0	M0	NO	Normal	GSE39582	NO
GSE17536_GSM437106	2034.6	0	78	female	unknow	2	1	unknow	unknow	unknow	unknow	unknow	GSE17536	unknow
GSE39582_GSM972492	2040	0	69	Male	Right-side	unknow	1	T2	N0	M0	NO	Normal	GSE39582	NO
GSE39582_GSM971986	2040	0	66.3	Male	Right-side	unknow	2	T3	N0	M0	NO	Normal	GSE39582	NO
GSE39582_GSM971987	2040	0	66.7	Male	Right-side	unknow	2	T3	N0	M0	NO	Normal	GSE39582	NO
GSE39582_GSM972070	2040	0	64	Female	Left-side	unknow	2	T4	N0	M0	YES	Normal	GSE39582	YES
GSE39582_GSM972478	2070	0	80	Male	Left-side	unknow	2	T3	N0	M0	NO	Normal	GSE39582	NO
GSE39582_GSM972480	2070	0	78	Male	Right-side	unknow	2	T3	N0	M0	YES	Normal	GSE39582	NO
GSE39582_GSM972090	2070	0	72	Female	Left-side	unknow	2	T3	N0	M0	NO	Normal	GSE39582	NO
GSE39582_GSM972341	2070	0	89	Female	Left-side	unknow	3	T3	N1	M0	NO	Normal	GSE39582	NO
GSE39582_GSM972418	2100	0	64	Male	Left-side	unknow	2	T3	N0	M0	NO	Normal	GSE39582	NO
GSE39582_GSM972491	2100	0	74	Male	Left-side	unknow	2	T3	N0	M0	NO	Normal	GSE39582	NO
GSE39582_GSM972063	2100	0	54	Male	Left-side	unknow	2	T3	N0	M0	YES	Normal	GSE39582	NO
GSE38832_GSM950431	2118	0	unknow	unknow	unknow	unknow	3	unknow	unknow	unknow	unknow	unknow	GSE38832	unknow
GSE17536_GSM437136	2119.5	0	83	female	unknow	2	2	unknow	unknow	unknow	unknow	unknow	GSE17536	unknow
TCGA_TCGA-WS-AB45	2130	0	52	Female	Right-side	unknow	2	T3	N0	unknow	unknow	unknow	TCGA	unknow
GSE39582_GSM972123	2130	0	53	Male	Right-side	unknow	2	T3	N0	M0	unknow	unknow	GSE39582	NO
GSE39582_GSM972467	2160	0	54	Male	Left-side	unknow	3	T3	N2	M0	YES	Normal	GSE39582	YES
GSE39582_GSM972499	2160	0	82	Male	Right-side	unknow	3	T4	N2	M0	NO	Normal	GSE39582	YES
GSE39582_GSM972346	2160	0	82	Female	Left-side	unknow	3	T3	N1	M0	NO	Abnormal	GSE39582	NO
GSE17536_GSM437198	2162.7	0	55	male	unknow	1	3	unknow	unknow	unknow	unknow	unknow	GSE17536	unknow
TCGA_TCGA-G4-6627	2175	0	84	Male	Right-side	unknow	2	T3	N0	M0	unknow	unknow	TCGA	unknow
TCGA_TCGA-G4-6309	2176	1	40	Female	Left-side	unknow	3	T3	N1	M0	unknow	unknow	TCGA	unknow
GSE39582_GSM971962	2190	0	60.9	Male	Right-side	unknow	3	T4	N2	M0	NO	Normal	GSE39582	YES
GSE39582_GSM972001	2190	0	71.5	Male	Left-side	unknow	3	T2	N1	M0	NO	Normal	GSE39582	NO
GSE39582_GSM972170	2190	0	67	Female	Left-side	unknow	3	T2	N2	M0	NO	unknow	GSE39582	NO
GSE39582_GSM972193	2190	0	51	Female	Left-side	unknow	3	T3	N1	M0	YES	Normal	GSE39582	YES
GSE39582_GSM972196	2190	0	69	Female	Right-side	unknow	2	T3	N0	M0	YES	Normal	GSE39582	NO
GSE39582_GSM972264	2190	0	46	Male	Right-side	unknow	2	T3	N0	M0	NO	Normal	GSE39582	NO
GSE39582_GSM972455	2220	0	89	Female	Right-side	unknow	3	T3	N1	M0	NO	Abnormal	GSE39582	NO
GSE39582_GSM972489	2220	0	77	Female	Right-side	unknow	2	T3	N0	M0	YES	Normal	GSE39582	NO
GSE39582_GSM972490	2220	0	67	Male	Left-side	unknow	2	T3	N0	M0	NO	Normal	GSE39582	NO
GSE39582_GSM971960	2220	0	38.2	Female	Left-side	unknow	1	T2	N0	M0	NO	Normal	GSE39582	NO
GSE39582_GSM972093	2220	0	55	Female	Left-side	unknow	2	T4	N0	M0	NO	Normal	GSE39582	YES
GSE39582_GSM972338	2220	0	69	Male	Left-side	unknow	2	T3	N0	M0	NO	Normal	GSE39582	YES
GSE39582_GSM972352	2220	1	66	Male	Left-side	unknow	3	T3	N2	M0	NO	Normal	GSE39582	YES
GSE17536_GSM437194	2235.9	0	63	male	unknow	2	3	unknow	unknow	unknow	unknow	unknow	GSE17536	unknow
GSE39582_GSM972454	2250	0	62	Male	Left-side	unknow	1	T2	N0	M0	YES	Normal	GSE39582	NO
GSE39582_GSM972466	2250	0	73	Female	Right-side	unknow	3	T3	N1	M0	YES	Normal	GSE39582	YES
GSE39582_GSM972485	2250	0	69	Male	Right-side	unknow	2	T3	N0	M0	YES	Normal	GSE39582	NO
GSE39582_GSM971972	2250	0	40.2	Male	Left-side	unknow	1	T2	N0	M0	NO	Normal	GSE39582	NO
GSE39582_GSM972124	2250	0	49	Female	Left-side	unknow	2	T3	N0	M0	NO	Normal	GSE39582	YES
GSE39582_GSM972331	2250	0	79	Male	Left-side	unknow	2	T3	N0	M0	NO	Normal	GSE39582	NO
GSE39582_GSM972344	2250	0	70	Female	Left-side	unknow	2	T3	N0	M0	NO	Normal	GSE39582	NO
TCGA_TCGA-G4-6299	2268	0	69	Male	Left-side	unknow	3	T3	N2	M0	unknow	unknow	TCGA	unknow
TCGA_TCGA-AZ-6601	2270	1	68	Male	Left-side	unknow	2	T3	N0	M0	unknow	unknow	TCGA	unknow
GSE39582_GSM972484	2280	0	68	Male	Left-side	unknow	2	T3	N0	M0	NO	Normal	GSE39582	YES
GSE39582_GSM972521	2280	0	90	Female	Right-side	unknow	2	T3	N0	M0	NO	Normal	GSE39582	NO
GSE39582_GSM971996	2280	0	63	Female	Right-side	unknow	3	T3	N1	M0	NO	Normal	GSE39582	NO
GSE39582_GSM972263	2280	0	32	Male	Left-side	unknow	3	T2	N1	M0	NO	Normal	GSE39582	YES
GSE39582_GSM972339	2280	0	67	Male	Right-side	unknow	3	T3	N1	M0	YES	Normal	GSE39582	YES
GSE17536_GSM437137	2281.2	0	73	male	unknow	2	2	unknow	unknow	unknow	unknow	unknow	GSE17536	unknow
GSE17536_GSM437105	2282.1	0	82	male	unknow	2	1	unknow	unknow	unknow	unknow	unknow	GSE17536	unknow
TCGA_TCGA-AZ-4313	2310	0	51	Female	Left-side	unknow	1	T1	N0	M0	unknow	unknow	TCGA	unknow
GSE39582_GSM972151	2310	0	75	Female	Left-side	unknow	3	T3	N1	M0	YES	unknow	GSE39582	YES
GSE39582_GSM972162	2310	0	73	Female	Left-side	unknow	3	T3	N1	M0	NO	unknow	GSE39582	YES
GSE39582_GSM972334	2310	0	79	Female	Right-side	unknow	3	T3	N2	M0	NO	Abnormal	GSE39582	YES
GSE39582_GSM972028	2340	0	46	Female	Right-side	unknow	3	T3	N2	M0	YES	Normal	GSE39582	YES
GSE39582_GSM972319	2340	0	71	Female	Left-side	unknow	2	T3	N0	M0	YES	Normal	GSE39582	YES
GSE39582_GSM972328	2340	1	74	Male	Left-side	unknow	3	T3	N2	M0	NO	Normal	GSE39582	YES
GSE39582_GSM972329	2340	0	61	Male	Left-side	unknow	2	T3	N0	M0	NO	Normal	GSE39582	NO
GSE39582_GSM972405	2370	0	70	Female	Left-side	unknow	2	T4	N0	M0	NO	Normal	GSE39582	NO
GSE39582_GSM972088	2370	0	73	Female	Left-side	unknow	2	T4	N0	M0	NO	Normal	GSE39582	NO
GSE39582_GSM972269	2370	0	70	Male	Right-side	unknow	1	T2	N0	M0	YES	Normal	GSE39582	NO
GSE17536_GSM437138	2373.9	0	57	female	unknow	1	2	unknow	unknow	unknow	unknow	unknow	GSE17536	unknow
TCGA_TCGA-AA-3660	2375	0	51	Female	Left-side	unknow	2	T3	N0	M0	unknow	unknow	TCGA	unknow
GSE39582_GSM972472	2400	0	58	Male	Right-side	unknow	2	T4	N0	M0	NO	Normal	GSE39582	YES
GSE39582_GSM972323	2400	0	67	Female	Left-side	unknow	3	T3	N1	M0	NO	Normal	GSE39582	YES
GSE39582_GSM972333	2400	0	49	Male	Left-side	unknow	2	T3	N0	M0	NO	Normal	GSE39582	YES
GSE17536_GSM437140	2407.5	0	86	female	unknow	2	2	unknow	unknow	unknow	unknow	unknow	GSE17536	unknow
GSE38832_GSM950512	2411.1	0	unknow	unknow	unknow	unknow	2	unknow	unknow	unknow	unknow	unknow	GSE38832	unknow
TCGA_TCGA-G4-6628	2424	0	78	Male	Right-side	unknow	1	T2	N0	M0	unknow	unknow	TCGA	unknow
GSE39582_GSM972426	2430	0	49	Male	Right-side	unknow	2	T3	N0	M0	NO	Normal	GSE39582	YES
GSE39582_GSM972477	2430	0	75	Male	Right-side	unknow	2	T3	N0	M0	YES	Normal	GSE39582	NO
GSE39582_GSM972358	2430	0	53	Female	Left-side	unknow	2	T3	N0	M0	NO	Normal	GSE39582	YES
GSE39582_GSM972371	2430	0	47	Male	Right-side	unknow	3	T3	N1	M0	NO	Normal	GSE39582	YES
GSE38832_GSM950420	2433	0	unknow	unknow	unknow	unknow	2	unknow	unknow	unknow	unknow	unknow	GSE38832	unknow
GSE39582_GSM972022	2460	0	76	Female	Right-side	unknow	3	T3	N2	M0	YES	Normal	GSE39582	YES
GSE39582_GSM972060	2460	0	66	Male	Left-side	unknow	2	T3	N0	M0	NO	Normal	GSE39582	NO
GSE39582_GSM972307	2460	0	71	Female	Right-side	unknow	2	T3	N0	M0	NO	Normal	GSE39582	YES
GSE39582_GSM972324	2460	0	72	Male	Left-side	unknow	2	T3	N0	M0	YES	Normal	GSE39582	NO
GSE39582_GSM972377	2460	0	59	Female	Left-side	unknow	3	T3	N1	M0	NO	Normal	GSE39582	YES
GSE17536_GSM437099	2468.7	0	66	male	unknow	1	1	unknow	unknow	unknow	unknow	unknow	GSE17536	unknow
GSE17536_GSM437238	2478.3	0	54	male	unknow	2	4	unknow	unknow	unknow	unknow	unknow	GSE17536	unknow
GSE39582_GSM972194	2490	0	43	Male	Left-side	unknow	3	T3	N2	M0	NO	Normal	GSE39582	YES
GSE39582_GSM972316	2490	0	77	Female	Right-side	unknow	2	T3	N0	M0	NO	Abnormal	GSE39582	NO
GSE39582_GSM972327	2490	0	60	Male	Right-side	unknow	2	T3	N0	M0	NO	Normal	GSE39582	NO
GSE39582_GSM972388	2490	0	75	Female	Left-side	unknow	2	T3	N0	M0	NO	Normal	GSE39582	NO
GSE17536_GSM437104	2508	0	62	male	unknow	2	1	unknow	unknow	unknow	unknow	unknow	GSE17536	unknow
GSE38832_GSM950444	2513.1	0	unknow	unknow	unknow	unknow	2	unknow	unknow	unknow	unknow	unknow	GSE38832	unknow
GSE39582_GSM972465	2520	0	73	Male	Right-side	unknow	2	T3	N0	M0	NO	Normal	GSE39582	NO
GSE39582_GSM972315	2520	0	60	Female	Left-side	unknow	1	T1	N0	M0	YES	Normal	GSE39582	NO
GSE17536_GSM437102	2523.9	0	66	male	unknow	2	1	unknow	unknow	unknow	unknow	unknow	GSE17536	unknow
GSE38832_GSM950519	2526	0	unknow	unknow	unknow	unknow	2	unknow	unknow	unknow	unknow	unknow	GSE38832	unknow
GSE38832_GSM950418	2532.9	0	unknow	unknow	unknow	unknow	2	unknow	unknow	unknow	unknow	unknow	GSE38832	unknow
GSE39582_GSM972470	2550	0	50	Male	Right-side	unknow	2	T3	N0	M0	NO	Normal	GSE39582	YES
GSE39582_GSM972127	2550	0	66	Female	Left-side	unknow	2	T3	N0	M0	YES	Normal	GSE39582	NO
GSE39582_GSM972326	2550	0	71	Female	Left-side	unknow	2	T3	N0	M0	YES	Normal	GSE39582	YES
GSE17536_GSM437131	2558.4	0	71	female	unknow	2	2	unknow	unknow	unknow	unknow	unknow	GSE17536	unknow
TCGA_TCGA-G4-6625	2564	1	77	Female	Left-side	unknow	2	T3	N0	M0	unknow	unknow	TCGA	unknow
GSE17536_GSM437191	2568.3	0	71	female	unknow	2	3	unknow	unknow	unknow	unknow	unknow	GSE17536	unknow
GSE38832_GSM950434	2568.9	0	unknow	unknow	unknow	unknow	3	unknow	unknow	unknow	unknow	unknow	GSE38832	unknow
GSE17536_GSM437227	2575.2	1	74	male	unknow	2	3	unknow	unknow	unknow	unknow	unknow	GSE17536	unknow
GSE39582_GSM972464	2580	0	76	Female	Left-side	unknow	1	T2	N0	M0	NO	Normal	GSE39582	NO
GSE39582_GSM972469	2580	0	69	Male	Left-side	unknow	1	T2	N0	M0	YES	Normal	GSE39582	NO
GSE39582_GSM972510	2580	0	89	Male	Left-side	unknow	2	T3	N0	M0	NO	Normal	GSE39582	NO
GSE39582_GSM971970	2580	0	31.7	Female	Right-side	unknow	1	T2	N0	M0	YES	Normal	GSE39582	NO
GSE39582_GSM972131	2580	0	78	Female	Right-side	unknow	2	T3	N0	M0	YES	Normal	GSE39582	NO
GSE39582_GSM972330	2580	0	79	Female	Right-side	unknow	2	T3	N0	M0	YES	Normal	GSE39582	NO
GSE39582_GSM972378	2580	0	78	Male	Right-side	unknow	3	T3	N2	M0	NO	Normal	GSE39582	YES
GSE17536_GSM437134	2592.9	0	74	female	unknow	2	2	unknow	unknow	unknow	unknow	unknow	GSE17536	unknow
TCGA_TCGA-CK-4950	2599	0	68	Female	Right-side	unknow	3	T3	N1	M0	unknow	unknow	TCGA	unknow
TCGA_TCGA-DM-A1HA	2600	0	82	Male	Right-side	unknow	3	T3	N2	M0	YES	Normal	TCGA	unknow
GSE39582_GSM972475	2610	0	68	Female	Left-side	unknow	2	T3	N0	M0	YES	Normal	GSE39582	NO
GSE39582_GSM971983	2610	0	75.3	Male	Right-side	unknow	3	T3	N1	M0	NO	Abnormal	GSE39582	NO
GSE39582_GSM972089	2610	0	68	Female	Right-side	unknow	2	T3	N0	M0	NO	Normal	GSE39582	NO
GSE39582_GSM972332	2610	0	72	Female	Left-side	unknow	2	T3	N0	M0	NO	Abnormal	GSE39582	NO
GSE39582_GSM972376	2610	0	73	Female	Left-side	unknow	3	T3	N2	M0	NO	Normal	GSE39582	YES
GSE39582_GSM972462	2640	0	72	Male	Left-side	unknow	1	T2	N0	M0	YES	Normal	GSE39582	NO
GSE17536_GSM437128	2669.7	0	74	male	unknow	2	2	unknow	unknow	unknow	unknow	unknow	GSE17536	unknow
GSE39582_GSM971997	2670	0	72	Male	Right-side	unknow	3	T3	N2	M0	NO	Abnormal	GSE39582	NO
GSE39582_GSM972004	2670	0	62.9	Female	Right-side	unknow	4	T3	N1	M1	YES	Normal	GSE39582	NO
GSE38832_GSM950516	2675.1	0	unknow	unknow	unknow	unknow	2	unknow	unknow	unknow	unknow	unknow	GSE38832	unknow
TCGA_TCGA-AZ-5407	2683	0	51	Female	Right-side	unknow	1	T1	N0	M0	unknow	unknow	TCGA	unknow
GSE17536_GSM437190	2688.6	0	46	male	unknow	2	3	unknow	unknow	unknow	unknow	unknow	GSE17536	unknow
GSE39582_GSM972374	2700	0	65	Male	Left-side	unknow	3	T1	N1	M0	NO	Normal	GSE39582	YES
GSE39582_GSM972386	2700	0	77	Female	Right-side	unknow	2	T3	N0	M0	YES	Normal	GSE39582	NO
GSE39582_GSM972399	2700	0	54	Female	Left-side	unknow	3	T4	N1	M0	NO	Normal	GSE39582	NO
GSE39582_GSM972410	2730	0	68	Female	Left-side	unknow	2	T3	N0	M0	NO	Normal	GSE39582	NO
GSE39582_GSM972015	2730	0	92.4	Female	Left-side	unknow	2	T3	N0	M0	YES	Normal	GSE39582	NO
GSE39582_GSM972313	2730	0	83	Female	Left-side	unknow	1	T2	N0	M0	NO	Normal	GSE39582	NO
GSE38832_GSM950529	2754	0	unknow	unknow	unknow	unknow	3	unknow	unknow	unknow	unknow	unknow	GSE38832	unknow
GSE39582_GSM972056	2760	0	78	Female	Right-side	unknow	2	T4	N0	M0	NO	Abnormal	GSE39582	NO
GSE39582_GSM972308	2760	0	79	Female	Right-side	unknow	3	T3	N1	M0	NO	Normal	GSE39582	NO
GSE39582_GSM972368	2760	0	70	Female	Left-side	unknow	3	T3	N1	M0	NO	Normal	GSE39582	YES
GSE39582_GSM972383	2760	0	70	Female	Left-side	unknow	2	T3	N0	M0	NO	Normal	GSE39582	NO
GSE38832_GSM950528	2766	0	unknow	unknow	unknow	unknow	3	unknow	unknow	unknow	unknow	unknow	GSE38832	unknow
GSE38832_GSM950437	2771.1	0	unknow	unknow	unknow	unknow	2	unknow	unknow	unknow	unknow	unknow	GSE38832	unknow
GSE38832_GSM950525	2774.1	0	unknow	unknow	unknow	unknow	3	unknow	unknow	unknow	unknow	unknow	GSE38832	unknow
GSE39582_GSM971968	2790	1	44.9	Female	Right-side	unknow	2	T4	N0	M0	YES	Normal	GSE39582	NO
GSE39582_GSM972055	2790	0	31	Female	Left-side	unknow	2	T4	N0	M0	NO	Normal	GSE39582	NO
GSE39582_GSM972128	2790	0	64	Male	Left-side	unknow	2	T3	N0	M0	NO	Normal	GSE39582	YES
GSE39582_GSM972159	2790	0	67	Male	Right-side	unknow	3	T3	N1	M0	YES	Normal	GSE39582	YES
GSE39582_GSM972389	2790	0	77	Male	Right-side	unknow	2	T4	N0	M0	YES	Normal	GSE39582	NO
GSE17536_GSM437119	2809.8	1	41	male	unknow	2	2	unknow	unknow	unknow	unknow	unknow	GSE17536	unknow
GSE39582_GSM972027	2820	0	70	Female	Right-side	unknow	3	T3	N2	M0	NO	Normal	GSE39582	YES
GSE39582_GSM972309	2850	0	78	Male	Right-side	unknow	2	T3	N0	M0	NO	Normal	GSE39582	YES
GSE39582_GSM972367	2850	0	72	Male	Left-side	unknow	3	T3	N1	M0	YES	Normal	GSE39582	YES
GSE39582_GSM972379	2850	0	63	Female	Left-side	unknow	3	T2	N1	M0	YES	Normal	GSE39582	YES
GSE38832_GSM950435	2850.9	0	unknow	unknow	unknow	unknow	2	unknow	unknow	unknow	unknow	unknow	GSE38832	unknow
GSE38832_GSM950513	2850.9	0	unknow	unknow	unknow	unknow	2	unknow	unknow	unknow	unknow	unknow	GSE38832	unknow
GSE17536_GSM437178	2852.1	0	71	female	unknow	2	3	unknow	unknow	unknow	unknow	unknow	GSE17536	unknow
GSE38832_GSM950522	2864.1	0	unknow	unknow	unknow	unknow	2	unknow	unknow	unknow	unknow	unknow	GSE38832	unknow
GSE39582_GSM972460	2880	0	70	Female	Left-side	unknow	2	T3	N0	M0	NO	Normal	GSE39582	YES
GSE39582_GSM972461	2880	0	56	Male	Left-side	unknow	2	T3	N0	M0	NO	Normal	GSE39582	NO
TCGA_TCGA-DM-A28M	2895	0	63	Male	Left-side	unknow	2	T3	N0	M0	YES	Normal	TCGA	unknow
GSE39582_GSM972451	2910	0	58	Male	Left-side	unknow	2	T4	N0	M0	NO	Normal	GSE39582	NO
GSE39582_GSM972085	2910	0	56	Male	Right-side	unknow	2	T3	N0	M0	NO	Normal	GSE39582	NO
GSE39582_GSM972174	2910	0	75	Male	Left-side	unknow	3	T3	N1	M0	NO	Normal	GSE39582	YES
GSE39582_GSM972312	2910	0	71	Male	Left-side	unknow	2	T3	N0	M0	NO	Normal	GSE39582	NO
GSE38832_GSM950441	2925.9	0	unknow	unknow	unknow	unknow	1	unknow	unknow	unknow	unknow	unknow	GSE38832	unknow
GSE39582_GSM972362	2940	0	50	Male	Right-side	unknow	3	T3	N1	M0	YES	Normal	GSE39582	YES
GSE39582_GSM972452	2970	0	75	Female	Right-side	unknow	3	T3	N2	M0	NO	Abnormal	GSE39582	YES
GSE39582_GSM972522	2970	0	53	Female	Right-side	unknow	2	T3	N0	M0	YES	Normal	GSE39582	YES
GSE17536_GSM437185	2985.3	0	48	female	unknow	1	3	unknow	unknow	unknow	unknow	unknow	GSE17536	unknow
TCGA_TCGA-DM-A28K	2988	0	75	Male	Right-side	unknow	2	T3	N0	M0	unknow	unknow	TCGA	unknow
GSE39582_GSM972453	3000	0	51	Female	Right-side	unknow	3	T3	N1	M0	YES	Normal	GSE39582	YES
GSE39582_GSM972012	3030	0	86.8	Female	Right-side	unknow	4	T3	N1	M1	YES	Normal	GSE39582	NO
GSE38832_GSM950440	3039	0	unknow	unknow	unknow	unknow	1	unknow	unknow	unknow	unknow	unknow	GSE38832	unknow
GSE39582_GSM972108	3090	0	64	Male	Left-side	unknow	3	T4	N1	M0	unknow	unknow	GSE39582	YES
GSE39582_GSM972364	3090	0	71	Female	Right-side	unknow	3	T3	N1	M0	YES	Normal	GSE39582	YES
GSE39582_GSM972409	3120	0	72	Female	Left-side	unknow	2	T4	N0	M0	NO	Normal	GSE39582	NO
GSE39582_GSM972424	3120	0	70	Male	Left-side	unknow	2	T3	N0	M0	NO	Normal	GSE39582	YES
GSE39582_GSM972301	3150	0	74	Male	Left-side	unknow	3	T3	N2	M0	NO	Normal	GSE39582	NO
GSE39582_GSM972397	3150	0	83	Female	Left-side	unknow	2	T3	N0	M0	YES	Normal	GSE39582	NO
GSE17536_GSM437175	3155.1	0	39	male	unknow	2	3	unknow	unknow	unknow	unknow	unknow	GSE17536	unknow
GSE38832_GSM950432	3168	0	unknow	unknow	unknow	unknow	3	unknow	unknow	unknow	unknow	unknow	GSE38832	unknow
GSE39582_GSM972406	3180	0	66	Female	Left-side	unknow	2	T3	N0	M0	NO	Normal	GSE39582	NO
GSE39582_GSM972501	3180	0	76	Female	Left-side	unknow	3	T3	N1	M0	NO	Normal	GSE39582	NO
GSE39582_GSM972311	3180	0	55	Male	Left-side	unknow	2	T3	N0	M0	NO	Normal	GSE39582	YES
GSE39582_GSM972384	3180	0	61	Male	Left-side	unknow	2	T3	N0	M0	NO	Normal	GSE39582	NO
GSE38832_GSM950523	3194.1	0	unknow	unknow	unknow	unknow	2	unknow	unknow	unknow	unknow	unknow	GSE38832	unknow
GSE17536_GSM437122	3208.2	0	70	male	unknow	2	2	unknow	unknow	unknow	unknow	unknow	GSE17536	unknow
GSE39582_GSM972396	3210	0	72	Male	Right-side	unknow	2	T3	N0	M0	NO	Normal	GSE39582	NO
GSE38832_GSM950442	3213	0	unknow	unknow	unknow	unknow	1	unknow	unknow	unknow	unknow	unknow	GSE38832	unknow
GSE39582_GSM972190	3240	0	68	Male	Left-side	unknow	2	T3	N0	M0	NO	Normal	GSE39582	YES
GSE38832_GSM950422	3257.1	0	unknow	unknow	unknow	unknow	3	unknow	unknow	unknow	unknow	unknow	GSE38832	unknow
GSE38832_GSM950429	3261.9	0	unknow	unknow	unknow	unknow	3	unknow	unknow	unknow	unknow	unknow	GSE38832	unknow
GSE39582_GSM971978	3270	0	71.4	Female	Right-side	unknow	1	T2	N0	M0	YES	Normal	GSE39582	NO
GSE39582_GSM972150	3270	0	55	Female	Left-side	unknow	3	T3	N1	M0	NO	unknow	GSE39582	YES
GSE17536_GSM437100	3276.3	0	63	male	unknow	2	1	unknow	unknow	unknow	unknow	unknow	GSE17536	unknow
GSE38832_GSM950471	3315	0	unknow	unknow	unknow	unknow	3	unknow	unknow	unknow	unknow	unknow	GSE38832	unknow
GSE17536_GSM437120	3323.7	0	43	female	unknow	2	2	unknow	unknow	unknow	unknow	unknow	GSE17536	unknow
TCGA_TCGA-AZ-4308	3324	0	47	Female	Left-side	unknow	3	T3	N1	M0	unknow	unknow	TCGA	unknow
GSE38832_GSM950520	3342	0	unknow	unknow	unknow	unknow	3	unknow	unknow	unknow	unknow	unknow	GSE38832	unknow
GSE39582_GSM972156	3360	0	67	Male	Left-side	unknow	3	T3	N1	M0	NO	unknow	GSE39582	YES
GSE17536_GSM437179	3369.9	0	64	female	unknow	2	3	unknow	unknow	unknow	unknow	unknow	GSE17536	unknow
GSE39582_GSM972018	3510	0	68	Female	Left-side	unknow	3	T2	N2	M0	NO	Normal	GSE39582	YES
GSE39582_GSM972375	3510	0	46	Female	Right-side	unknow	3	T3	N1	M0	YES	Normal	GSE39582	YES
GSE17536_GSM437232	3519	0	72	female	unknow	2	4	unknow	unknow	unknow	unknow	unknow	GSE17536	unknow
GSE39582_GSM972515	3540	0	72	Female	Left-side	unknow	2	T3	N0	M0	NO	Normal	GSE39582	NO
GSE39582_GSM972157	3540	0	57	Male	Left-side	unknow	3	T3	N1	M0	NO	unknow	GSE39582	YES
GSE17536_GSM437117	3557.4	0	74	female	unknow	2	2	unknow	unknow	unknow	unknow	unknow	GSE17536	unknow
GSE39582_GSM972082	3570	1	75	Male	Left-side	unknow	2	T3	N0	M0	YES	Normal	GSE39582	YES
GSE17536_GSM437096	3576.3	0	56	female	unknow	1	1	unknow	unknow	unknow	unknow	unknow	GSE17536	unknow
GSE39582_GSM972158	3600	0	45	Female	Right-side	unknow	3	T3	N2	M0	YES	unknow	GSE39582	YES
GSE39582_GSM972195	3600	0	54	Female	Right-side	unknow	2	T3	N0	M0	YES	Normal	GSE39582	YES
GSE39582_GSM972144	3630	0	63	Female	Left-side	unknow	2	T3	N0	M0	NO	Normal	GSE39582	NO
TCGA_TCGA-DM-A28E	3648	0	72	Female	Left-side	unknow	2	T3	N0	M0	YES	Normal	TCGA	unknow
GSE39582_GSM972191	3660	0	49	Male	Left-side	unknow	3	T3	N1	M0	YES	Normal	GSE39582	YES
GSE17536_GSM437094	3681.6	0	63	male	unknow	1	1	unknow	unknow	unknow	unknow	unknow	GSE17536	unknow
GSE39582_GSM972411	3750	0	48	Female	Left-side	unknow	3	T1	N1	M0	YES	unknow	GSE39582	YES
GSE39582_GSM972083	3810	0	65	Female	Left-side	unknow	2	T3	N0	M0	NO	Normal	GSE39582	NO
GSE39582_GSM972148	3810	0	59	Male	Left-side	unknow	3	T3	N1	M0	YES	unknow	GSE39582	YES
GSE39582_GSM972084	3870	0	73	Female	Left-side	unknow	2	T3	N0	M0	NO	Normal	GSE39582	NO
GSE39582_GSM972171	3900	0	70	Female	Right-side	unknow	3	T4	N1	M0	NO	unknow	GSE39582	NO
GSE39582_GSM972502	3930	0	69	Male	Left-side	unknow	2	T3	N0	M0	NO	Normal	GSE39582	NO
GSE39582_GSM972407	3960	0	42	Female	Left-side	unknow	2	T4	N0	M0	NO	Normal	GSE39582	YES
GSE39582_GSM972149	3960	0	64	Male	Left-side	unknow	2	T3	N0	M0	NO	unknow	GSE39582	NO
TCGA_TCGA-DM-A1D0	3974	0	79	Female	Left-side	unknow	2	T3	N0	M0	YES	Normal	TCGA	unknow
GSE39582_GSM972353	3990	0	46	Female	Right-side	unknow	2	T4	N0	M0	YES	Normal	GSE39582	YES
GSE39582_GSM972508	4020	0	69	Female	Left-side	unknow	1	T1	N0	M0	YES	Normal	GSE39582	NO
GSE39582_GSM972145	4050	0	63	Female	Left-side	unknow	3	T3	N2	M0	NO	unknow	GSE39582	YES
TCGA_TCGA-G4-6293	4051	0	49	Female	Right-side	unknow	3	T3	N1	M0	unknow	unknow	TCGA	unknow
TCGA_TCGA-DM-A1HB	4126	0	75	Male	Right-side	unknow	3	T3	N1	M0	NO	Abnormal	TCGA	unknow
GSE39582_GSM972147	4200	0	79	Male	Left-side	unknow	2	T3	N0	M0	NO	Normal	GSE39582	NO
GSE39582_GSM972363	4200	0	68	Female	Left-side	unknow	3	T3	N1	M0	YES	Normal	GSE39582	YES
GSE39582_GSM972506	4230	0	68	Male	Left-side	unknow	2	T3	N0	M0	NO	Normal	GSE39582	NO
GSE39582_GSM972360	4230	0	54	Female	Left-side	unknow	3	T3	N1	M0	NO	Normal	GSE39582	YES
TCGA_TCGA-DM-A282	4233	0	60	Female	Right-side	unknow	2	T3	N0	M0	NO	Normal	TCGA	unknow
GSE39582_GSM972496	4260	0	65	Female	Left-side	unknow	1	T2	N0	M0	NO	Normal	GSE39582	NO
TCGA_TCGA-DM-A1D9	4270	0	67	Female	Right-side	unknow	2	T3	N0	M0	unknow	unknow	TCGA	unknow
GSE17536_GSM437093	4276.5	0	73	male	unknow	2	1	unknow	unknow	unknow	unknow	unknow	GSE17536	unknow
GSE39582_GSM972505	4320	0	69	Male	Left-side	unknow	2	T3	N0	M0	NO	Normal	GSE39582	NO
GSE39582_GSM972417	4380	0	59	Male	Left-side	unknow	2	T3	N0	M0	NO	Normal	GSE39582	YES
GSE39582_GSM972503	4380	0	42	Female	Left-side	unknow	2	T3	N0	M0	NO	Normal	GSE39582	YES
GSE39582_GSM972395	4410	0	64	Male	Left-side	unknow	3	T4	N1	M0	NO	Normal	GSE39582	YES
TCGA_TCGA-CK-4948	4502	0	45	Female	Left-side	unknow	3	T3	N1	M0	unknow	unknow	TCGA	unknow
GSE39582_GSM972076	4590	0	48	Male	Right-side	unknow	2	T3	N0	M0	NO	Normal	GSE39582	NO
GSE39582_GSM972143	4620	0	57	Male	Left-side	unknow	2	T4	N0	M0	NO	Normal	GSE39582	NO
GSE39582_GSM972192	4740	0	72	Female	Right-side	unknow	2	T3	N0	M0	YES	Normal	GSE39582	NO
GSE39582_GSM972073	4890	0	80	Female	Right-side	unknow	2	T3	N0	M0	YES	Normal	GSE39582	NO
GSE39582_GSM972169	4920	0	50	Male	Left-side	unknow	2	T4	N0	M0	NO	unknow	GSE39582	NO
GSE39582_GSM972079	5040	0	44	Male	Left-side	unknow	2	T3	N0	M0	NO	Normal	GSE39582	YES
GSE39582_GSM972072	5160	0	70	Female	Right-side	unknow	2	T4	N0	M0	NO	Abnormal	GSE39582	NO
GSE39582_GSM972067	5490	0	83	Female	Left-side	unknow	2	T3	N0	M0	NO	Normal	GSE39582	NO
GSE39582_GSM972071	5490	0	68	Female	Left-side	unknow	2	T3	N0	M0	NO	Normal	GSE39582	NO
GSE39582_GSM972189	5760	0	63	Male	Right-side	unknow	3	T4	unknow	M0	NO	Normal	GSE39582	NO
GSE39582_GSM972069	6030	0	68	Male	Right-side	unknow	2	T3	N0	M0	YES	Normal	GSE39582	NO

## Sheet: Supplementary Table 5
Supplementary Table 5. Spearman correlation analysis of the 36 ARGs.
From	To	Cor	P-value	Color	Weight
VCAN	POSTN	0.863171	0	pink	5.17903
VCAN	FSTL1	0.843609	3.1442e-301	pink	5.06165
VCAN	STC1	0.507479	1.23722e-73	pink	3.04487
VCAN	LPL	0.297439	4.32115e-24	pink	1.78464
VCAN	PF4	-0.154096	2.51361e-07	#6495ED	0.924574
VCAN	THBD	0.710429	4.29572e-171	pink	4.26257
VCAN	FGFR1	0.620024	8.94865e-119	pink	3.72015
VCAN	COL5A2	0.934962	0	pink	5.60977
VCAN	ITGAV	0.649035	1.28004e-133	pink	3.89421
VCAN	KCNJ8	0.617898	9.52639e-118	pink	3.70739
VCAN	APP	0.133814	7.77355e-06	pink	0.802884
VCAN	JAG1	0.204543	6.12271e-12	pink	1.22726
VCAN	COL3A1	0.908522	0	pink	5.45113
VCAN	SPP1	0.60084	8.74437e-110	pink	3.60504
VCAN	NRP1	0.755104	3.34743e-205	pink	4.53062
VCAN	OLR1	0.681159	4.45352e-152	pink	4.08696
VCAN	PDGFA	0.269059	7.60413e-20	pink	1.61436
VCAN	SLCO2A1	0.14427	1.40524e-06	pink	0.865618
VCAN	VAV2	0.117594	8.66267e-05	pink	0.705564
VCAN	S100A4	0.408037	9.774e-46	pink	2.44822
VCAN	MSX1	-0.189813	1.86632e-10	#6495ED	1.13888
VCAN	TIMP1	0.595534	2.09767e-107	pink	3.57321
VCAN	LUM	0.865905	0	pink	5.19543
VCAN	CXCL6	0.25004	2.86431e-17	pink	1.50024
POSTN	FSTL1	0.732257	6.73475e-187	pink	4.39354
POSTN	STC1	0.563089	9.03283e-94	pink	3.37853
POSTN	LPL	0.191594	1.25199e-10	pink	1.14957
POSTN	PF4	-0.135527	5.92388e-06	#6495ED	0.813161
POSTN	THBD	0.651762	4.24151e-135	pink	3.91057
POSTN	FGFR1	0.519267	1.35392e-77	pink	3.1156
POSTN	COL5A2	0.88608	0	pink	5.31648
POSTN	ITGAV	0.631797	1.31475e-124	pink	3.79078
POSTN	KCNJ8	0.623875	1.17849e-120	pink	3.74325
POSTN	JAG1	0.176769	3.08931e-09	pink	1.06061
POSTN	COL3A1	0.864701	0	pink	5.18821
POSTN	SPP1	0.686836	1.37149e-155	pink	4.12101
POSTN	NRP1	0.740285	4.14752e-193	pink	4.44171
POSTN	OLR1	0.694943	9.54423e-161	pink	4.16966
POSTN	PDGFA	0.195156	5.57098e-11	pink	1.17094
POSTN	S100A4	0.429213	6.30889e-51	pink	2.57528
POSTN	MSX1	-0.179782	1.64499e-09	#6495ED	1.07869
POSTN	TIMP1	0.588102	3.819e-104	pink	3.52861
POSTN	LUM	0.81508	1.10467e-264	pink	4.89048
POSTN	CXCL6	0.331209	8.41644e-30	pink	1.98725
FSTL1	STC1	0.424272	1.10735e-49	pink	2.54563
FSTL1	LPL	0.322566	2.86534e-28	pink	1.9354
FSTL1	THBD	0.705582	8.7942e-168	pink	4.23349
FSTL1	FGFR1	0.63473	4.22387e-126	pink	3.80838
FSTL1	COL5A2	0.842092	4.17461e-299	pink	5.05255
FSTL1	ITGAV	0.643662	9.5145e-131	pink	3.86197
FSTL1	KCNJ8	0.620017	9.01959e-119	pink	3.7201
FSTL1	APP	0.166713	2.34122e-08	pink	1.00028
FSTL1	JAG1	0.164046	3.92728e-08	pink	0.984274
FSTL1	COL3A1	0.842922	2.89512e-300	pink	5.05753
FSTL1	SPP1	0.456467	3.57463e-58	pink	2.7388
FSTL1	NRP1	0.643212	1.64624e-130	pink	3.85927
FSTL1	OLR1	0.537403	5.31158e-84	pink	3.22442
FSTL1	PDGFA	0.271277	3.68778e-20	pink	1.62766
FSTL1	SLCO2A1	0.29575	7.98289e-24	pink	1.7745
FSTL1	S100A4	0.420748	8.3035e-49	pink	2.52449
FSTL1	MSX1	-0.192901	9.31868e-11	#6495ED	1.15741
FSTL1	TIMP1	0.520212	6.41513e-78	pink	3.12127
FSTL1	LUM	0.846061	1.04004e-304	pink	5.07637
FSTL1	CXCL6	0.263246	4.90839e-19	pink	1.57947
LRPAP1	VEGFA	-0.128788	1.69313e-05	#6495ED	0.772727
LRPAP1	MSX1	0.13281	9.10194e-06	pink	0.79686
STC1	VEGFA	0.357193	1.03255e-34	pink	2.14316
STC1	THBD	0.497357	2.35326e-70	pink	2.98414
STC1	FGFR1	0.374117	3.62712e-38	pink	2.2447
STC1	TNFRSF21	0.256669	3.82957e-18	pink	1.54001
STC1	COL5A2	0.565264	1.22649e-94	pink	3.39159
STC1	ITGAV	0.37282	6.78452e-38	pink	2.23692
STC1	KCNJ8	0.521008	3.41533e-78	pink	3.12605
STC1	JAG1	0.133723	7.88593e-06	pink	0.802338
STC1	COL3A1	0.506141	3.40645e-73	pink	3.03684
STC1	SPP1	0.475457	1.26144e-63	pink	2.85274
STC1	NRP1	0.573423	6.0009e-98	pink	3.44054
STC1	OLR1	0.488324	1.60913e-67	pink	2.92994
STC1	PDGFA	0.124213	3.35536e-05	pink	0.745277
STC1	S100A4	0.273255	1.92351e-20	pink	1.63953
STC1	TIMP1	0.438958	1.92493e-53	pink	2.63375
STC1	PRG2	0.14335	1.64144e-06	pink	0.860103
STC1	LUM	0.411466	1.49483e-46	pink	2.4688
STC1	CXCL6	0.398884	1.31941e-43	pink	2.39331
LPL	THBD	0.21126	1.17964e-12	pink	1.26756
LPL	FGFR1	0.218426	1.91325e-13	pink	1.31056
LPL	COL5A2	0.26164	8.14944e-19	pink	1.56984
LPL	ITGAV	0.247863	5.47722e-17	pink	1.48718
LPL	KCNJ8	0.224045	4.39226e-14	pink	1.34427
LPL	APP	0.202797	9.30931e-12	pink	1.21678
LPL	JAG1	0.13008	1.38983e-05	pink	0.780479
LPL	COL3A1	0.229128	1.12099e-14	pink	1.37477
LPL	SPP1	0.194943	5.85045e-11	pink	1.16966
LPL	NRP1	0.2359	1.72591e-15	pink	1.4154
LPL	OLR1	0.238865	7.46764e-16	pink	1.43319
LPL	LUM	0.2952	9.73935e-24	pink	1.7712
VEGFA	TNFRSF21	0.216282	3.31888e-13	pink	1.29769
VEGFA	COL5A2	0.143543	1.58893e-06	pink	0.86126
VEGFA	APP	0.152594	3.29333e-07	pink	0.915565
VEGFA	PTK2	0.243244	2.12164e-16	pink	1.45947
VEGFA	SLCO2A1	-0.189302	2.09112e-10	#6495ED	1.13581
VEGFA	VAV2	0.169457	1.36318e-08	pink	1.01674
PF4	FGFR1	-0.121552	4.94179e-05	#6495ED	0.72931
PF4	COL5A2	-0.125216	2.89384e-05	#6495ED	0.751296
PF4	COL3A1	-0.15078	4.54852e-07	#6495ED	0.904682
PF4	SPP1	-0.116673	9.84652e-05	#6495ED	0.700041
PF4	NRP1	-0.171359	9.32243e-09	#6495ED	1.02815
PF4	OLR1	-0.117263	9.07153e-05	#6495ED	0.70358
THBD	FGFR1	0.567193	2.06179e-95	pink	3.40316
THBD	COL5A2	0.740199	4.84305e-193	pink	4.4412
THBD	ITGAV	0.504775	9.53651e-73	pink	3.02865
THBD	KCNJ8	0.653006	8.86507e-136	pink	3.91803
THBD	JAG1	0.170564	1.09331e-08	pink	1.02338
THBD	COL3A1	0.703615	1.85526e-166	pink	4.22169
THBD	SPP1	0.513083	1.69331e-75	pink	3.0785
THBD	NRP1	0.716597	2.0827e-175	pink	4.29958
THBD	OLR1	0.591854	8.84166e-106	pink	3.55113
THBD	PDGFA	0.295459	8.86962e-24	pink	1.77275
THBD	SLCO2A1	0.294716	1.16011e-23	pink	1.76829
THBD	S100A4	0.373114	5.88822e-38	pink	2.23868
THBD	MSX1	-0.123885	3.52095e-05	#6495ED	0.743308
THBD	TIMP1	0.520481	5.18441e-78	pink	3.12289
THBD	PRG2	0.140656	2.57391e-06	pink	0.843935
THBD	LUM	0.684779	2.62189e-154	pink	4.10868
THBD	CXCL6	0.379204	3.02085e-39	pink	2.27523
FGFR1	COL5A2	0.613162	1.73295e-115	pink	3.67897
FGFR1	ITGAV	0.390994	8.01636e-42	pink	2.34597
FGFR1	SERPINA5	0.181518	1.13846e-09	pink	1.08911
FGFR1	KCNJ8	0.514742	4.6833e-76	pink	3.08845
FGFR1	APP	0.183314	7.75012e-10	pink	1.09988
FGFR1	JAG1	0.135201	6.23993e-06	pink	0.811205
FGFR1	COL3A1	0.638662	3.96964e-128	pink	3.83197
FGFR1	SPP1	0.38645	8.1189e-41	pink	2.3187
FGFR1	NRP1	0.516132	1.58591e-76	pink	3.09679
FGFR1	OLR1	0.415206	1.88169e-47	pink	2.49123
FGFR1	PDGFA	0.229366	1.05074e-14	pink	1.37619
FGFR1	SLCO2A1	0.300318	1.504e-24	pink	1.80191
FGFR1	VAV2	0.11679	9.68808e-05	pink	0.700742
FGFR1	S100A4	0.360676	2.08848e-35	pink	2.16406
FGFR1	TIMP1	0.439415	1.45971e-53	pink	2.63649
FGFR1	PRG2	0.125547	2.75505e-05	pink	0.753285
FGFR1	JAG2	0.172118	8.00105e-09	pink	1.03271
FGFR1	LUM	0.563462	6.42171e-94	pink	3.38077
FGFR1	CXCL6	0.130713	1.26079e-05	pink	0.784279
TNFRSF21	ITGAV	0.159672	9.00854e-08	pink	0.95803
TNFRSF21	APP	0.144233	1.41392e-06	pink	0.8654
TNFRSF21	JAG1	0.287279	1.6291e-22	pink	1.72368
TNFRSF21	NRP1	0.126647	2.33866e-05	pink	0.75988
TNFRSF21	SLCO2A1	0.15276	3.19677e-07	pink	0.916562
CCND2	S100A4	-0.134402	7.08339e-06	#6495ED	0.806415
COL5A2	ITGAV	0.650304	2.63196e-134	pink	3.90183
COL5A2	KCNJ8	0.63906	2.46687e-128	pink	3.83436
COL5A2	JAG1	0.220137	1.22754e-13	pink	1.32082
COL5A2	COL3A1	0.947673	0	pink	5.68604
COL5A2	SPP1	0.621515	1.68643e-119	pink	3.72909
COL5A2	NRP1	0.756719	1.42676e-206	pink	4.54031
COL5A2	OLR1	0.68923	4.28198e-157	pink	4.13538
COL5A2	PDGFA	0.288438	1.08485e-22	pink	1.73063
COL5A2	PTK2	0.126042	2.5597e-05	pink	0.756252
COL5A2	SLCO2A1	0.126343	2.4472e-05	pink	0.75806
COL5A2	VAV2	0.13635	5.19242e-06	pink	0.8181
COL5A2	S100A4	0.454153	1.56517e-57	pink	2.72492
COL5A2	MSX1	-0.190961	1.44346e-10	#6495ED	1.14577
COL5A2	TIMP1	0.621223	2.34099e-119	pink	3.72734
COL5A2	LUM	0.863395	0	pink	5.18037
COL5A2	CXCL6	0.325105	1.02855e-28	pink	1.95063
ITGAV	KCNJ8	0.388394	3.02782e-41	pink	2.33037
ITGAV	APP	0.241636	3.37768e-16	pink	1.44982
ITGAV	JAG1	0.271555	3.36705e-20	pink	1.62933
ITGAV	COL3A1	0.614144	5.93033e-116	pink	3.68487
ITGAV	SPP1	0.426922	2.39579e-50	pink	2.56153
ITGAV	NRP1	0.553353	5.74487e-90	pink	3.32012
ITGAV	OLR1	0.565682	8.34675e-95	pink	3.39409
ITGAV	PDGFA	0.151352	4.10999e-07	pink	0.908113
ITGAV	PTK2	0.223348	5.28349e-14	pink	1.34009
ITGAV	SLCO2A1	0.141374	2.28513e-06	pink	0.848241
ITGAV	S100A4	0.29399	1.50668e-23	pink	1.76394
ITGAV	MSX1	-0.189499	2.00143e-10	#6495ED	1.13699
ITGAV	TIMP1	0.357603	8.56297e-35	pink	2.14562
ITGAV	LUM	0.726898	7.09027e-183	pink	4.36139
ITGAV	CXCL6	0.217177	2.63941e-13	pink	1.30306
SERPINA5	KCNJ8	0.175147	4.31701e-09	pink	1.05088
SERPINA5	PGLYRP1	0.19715	3.51649e-11	pink	1.1829
SERPINA5	VAV2	0.119622	6.51118e-05	pink	0.717734
SERPINA5	APOH	0.239754	5.79632e-16	pink	1.43852
SERPINA5	PRG2	0.160284	8.03105e-08	pink	0.961703
KCNJ8	COL3A1	0.640327	5.39222e-129	pink	3.84196
KCNJ8	SPP1	0.499798	3.89847e-71	pink	2.99879
KCNJ8	NRP1	0.668712	1.19114e-144	pink	4.01227
KCNJ8	OLR1	0.520812	3.98896e-78	pink	3.12487
KCNJ8	PDGFA	0.186608	3.78984e-10	pink	1.11965
KCNJ8	SLCO2A1	0.134879	6.56783e-06	pink	0.809273
KCNJ8	VAV2	0.119131	6.98009e-05	pink	0.714787
KCNJ8	S100A4	0.337737	5.4303e-31	pink	2.02642
KCNJ8	TIMP1	0.523323	5.4015e-79	pink	3.13994
KCNJ8	PRG2	0.127848	1.95227e-05	pink	0.767088
KCNJ8	LUM	0.57968	1.49764e-100	pink	3.47808
KCNJ8	CXCL6	0.316743	2.89607e-27	pink	1.90046
APP	JAG1	0.190719	1.52407e-10	pink	1.14431
APP	PDGFA	0.117967	8.22224e-05	pink	0.707803
APP	PTK2	0.15684	1.52375e-07	pink	0.941041
APP	SLCO2A1	0.156501	1.62159e-07	pink	0.939009
JAG1	COL3A1	0.197155	3.51294e-11	pink	1.18293
JAG1	SPP1	0.120697	5.5868e-05	pink	0.724182
JAG1	NRP1	0.235536	1.91145e-15	pink	1.41322
JAG1	OLR1	0.171619	8.84658e-09	pink	1.02972
JAG1	SLCO2A1	0.147058	8.72087e-07	pink	0.882346
JAG1	S100A4	0.139673	3.02693e-06	pink	0.838035
JAG1	LUM	0.196268	4.31265e-11	pink	1.17761
COL3A1	SPP1	0.577003	1.97631e-99	pink	3.46202
COL3A1	NRP1	0.71691	1.24965e-175	pink	4.30146
COL3A1	OLR1	0.624788	4.1859e-121	pink	3.74873
COL3A1	PDGFA	0.27841	3.43743e-21	pink	1.67046
COL3A1	SLCO2A1	0.176137	3.52062e-09	pink	1.05682
COL3A1	VAV2	0.134514	6.95951e-06	pink	0.807083
COL3A1	S100A4	0.459948	3.79828e-59	pink	2.75969
COL3A1	MSX1	-0.207682	2.85582e-12	#6495ED	1.24609
COL3A1	TIMP1	0.623898	1.14746e-120	pink	3.74339
COL3A1	LUM	0.868222	0	pink	5.20933
COL3A1	CXCL6	0.278783	3.0303e-21	pink	1.6727
SPP1	NRP1	0.659342	2.7111e-139	pink	3.95605
SPP1	OLR1	0.735623	1.78821e-189	pink	4.41374
SPP1	PDGFA	0.157378	1.38007e-07	pink	0.944265
SPP1	SLCO2A1	-0.121642	4.87777e-05	#6495ED	0.729853
SPP1	S100A4	0.348157	5.95314e-33	pink	2.08894
SPP1	TIMP1	0.533601	1.26068e-82	pink	3.20161
SPP1	LUM	0.563581	5.75726e-94	pink	3.38149
SPP1	CXCL6	0.21563	3.91982e-13	pink	1.29378
NRP1	OLR1	0.708519	8.82632e-170	pink	4.25111
NRP1	PDGFA	0.189522	1.9911e-10	pink	1.13713
NRP1	SLCO2A1	0.149304	5.89945e-07	pink	0.895824
NRP1	S100A4	0.362324	9.7373e-36	pink	2.17394
NRP1	MSX1	-0.127972	1.91598e-05	#6495ED	0.767833
NRP1	TIMP1	0.569946	1.5857e-96	pink	3.41968
NRP1	PRG2	0.164527	3.57973e-08	pink	0.98716
NRP1	LUM	0.67922	6.75819e-151	pink	4.07532
NRP1	CXCL6	0.302727	6.16308e-25	pink	1.81636
OLR1	PDGFA	0.116703	9.80669e-05	pink	0.700216
OLR1	PTK2	0.140657	2.57328e-06	pink	0.843944
OLR1	S100A4	0.38848	2.89921e-41	pink	2.33088
OLR1	TIMP1	0.549622	1.52667e-88	pink	3.29773
OLR1	LUM	0.657517	2.84361e-138	pink	3.9451
OLR1	CXCL6	0.221407	8.80904e-14	pink	1.32844
PDGFA	VAV2	0.241401	3.61489e-16	pink	1.4484
PDGFA	MSX1	-0.188735	2.37173e-10	#6495ED	1.13241
PDGFA	TIMP1	0.170607	1.08386e-08	pink	1.02364
PDGFA	LUM	0.217101	2.69137e-13	pink	1.3026
PTK2	VAV2	0.182959	8.36521e-10	pink	1.09775
PTK2	JAG2	0.121668	4.85984e-05	pink	0.730006
SLCO2A1	LUM	0.171537	8.99409e-09	pink	1.02922
PGLYRP1	PRG2	0.25911	1.79872e-18	pink	1.55466
PGLYRP1	CXCL6	0.128918	1.65994e-05	pink	0.773507
VAV2	JAG2	0.245174	1.20887e-16	pink	1.47105
S100A4	TIMP1	0.448479	5.57237e-56	pink	2.69087
S100A4	LUM	0.461265	1.61497e-59	pink	2.76759
S100A4	CXCL6	0.134717	6.7393e-06	pink	0.808299
MSX1	JAG2	0.155678	1.88545e-07	pink	0.934069
MSX1	LUM	-0.207163	3.24252e-12	#6495ED	1.24298
TIMP1	LUM	0.537477	4.99411e-84	pink	3.22486
TIMP1	CXCL6	0.191112	1.39535e-10	pink	1.14667
PRG2	CXCL6	0.181032	1.26235e-09	pink	1.08619
LUM	CXCL6	0.276948	5.62289e-21	pink	1.66169

## Sheet: Supplementary Table 6
Supplementary Table 6. Prognostic analysis of 620 subtype-related genes using a univariate Cox regression model.
id	HR	HR.95L	HR.95H	P-value
RAB31	1.15323	1.04493	1.27276	0.00460514
SPOCK1	1.18464	1.09316	1.28377	3.58939e-05
SULF1	1.14949	1.0576	1.24937	0.00104727
COL5A2	1.23704	1.1219	1.36399	1.9773e-05
FRMD6	1.2807	1.15146	1.42444	5.14907e-06
FBN1	1.23688	1.12244	1.363	1.77416e-05
FAP	1.15979	1.06407	1.26412	0.000743568
POSTN	1.18116	1.08139	1.29015	0.000217649
PRRX1	1.18513	1.07533	1.30613	0.000616881
COL10A1	1.1262	1.06142	1.19494	8.41723e-05
ADAM12	1.20229	1.081	1.33718	0.000685064
BCAT1	1.21985	1.08669	1.36934	0.000753121
CTHRC1	1.15202	1.0623	1.24932	0.000624101
SPARC	1.28258	1.14531	1.4363	1.63958e-05
COL3A1	1.24134	1.12161	1.37384	2.9442e-05
THBS2	1.18698	1.1032	1.27712	4.43989e-06
VCAN	1.22499	1.11398	1.34708	2.82923e-05
TNFAIP6	1.11566	1.02635	1.21274	0.0101453
TIMP2	1.25107	1.11811	1.39985	9.33591e-05
INHBA	1.25274	1.12906	1.38996	2.14897e-05
GAS1	1.18633	1.09055	1.29053	6.94616e-05
GFPT2	1.21067	1.08835	1.34673	0.000434726
COL6A3	1.19788	1.08007	1.32856	0.000630748
FNDC1	1.14959	1.06965	1.2355	0.000150093
LUM	1.14075	1.03753	1.25424	0.00650317
AEBP1	1.20248	1.10042	1.31401	4.61253e-05
LOX	1.19683	1.07816	1.32855	0.000744522
COL1A2	1.20653	1.09603	1.32817	0.000127633
OLFML2B	1.24736	1.12189	1.38686	4.38234e-05
COL11A1	1.1509	1.07028	1.2376	0.000148764
NOX4	1.31019	1.13629	1.5107	0.000200363
GPNMB	1.13178	1.04071	1.23081	0.00382343
DDR2	1.2168	1.08821	1.36057	0.000574131
BGN	1.24264	1.12537	1.37214	1.74544e-05
ANTXR1	1.24302	1.10502	1.39826	0.000291025
COL8A1	1.26213	1.13741	1.40052	1.15769e-05
SFRP2	1.11671	1.06208	1.17415	1.60833e-05
COL5A1	1.23885	1.12002	1.37029	3.14227e-05
PLXDC2	1.17041	1.04834	1.3067	0.00511155
SNAI2	1.18943	1.06307	1.33082	0.00246762
CDH11	1.26153	1.13052	1.40772	3.28143e-05
MSRB3	1.28802	1.14943	1.44332	1.31414e-05
GLT8D2	1.18187	1.05136	1.32858	0.00512916
VIM	1.32003	1.15867	1.50387	2.99688e-05
FERMT2	1.28881	1.15126	1.4428	1.05296e-05
VEGFC	1.37893	1.19582	1.59008	9.86494e-06
OLR1	1.174	1.07825	1.27825	0.000219433
ADAMTS12	1.25917	1.0935	1.44993	0.00136525
GPC6	1.20423	1.06849	1.35721	0.00232223
MITF	1.34971	1.15363	1.57911	0.000180807
ADAMTS2	1.14988	1.02863	1.28542	0.01403
ZEB2	1.29878	1.10159	1.53127	0.00186094
NRP1	1.31701	1.13424	1.52924	0.000303392
SDC2	1.23588	1.09643	1.39307	0.00052634
CLMP	1.15992	1.03669	1.29779	0.00963312
GNB4	1.18526	1.02792	1.36668	0.0193393
DCN	1.16961	1.04631	1.30744	0.00584415
VGLL3	1.29104	1.14465	1.45616	3.18073e-05
CALD1	1.25646	1.11319	1.41817	0.000219158
COL15A1	1.13569	1.02755	1.2552	0.0126901
ANGPTL2	1.19201	1.06571	1.33329	0.002115
COL12A1	1.19299	1.06873	1.33169	0.00166404
ITGAM	1.18093	1.05944	1.31636	0.00267942
KCNE4	1.36786	1.19319	1.56809	6.98573e-06
CCDC80	1.21963	1.11118	1.33866	2.92941e-05
MXRA5	1.12903	1.02977	1.23786	0.0097438
HTRA1	1.32359	1.1818	1.4824	1.23877e-06
ASPN	1.17607	1.09777	1.25995	3.9558e-06
TUBB6	1.26931	1.1241	1.43328	0.000119491
LGALS1	1.28724	1.13517	1.45969	8.26945e-05
HEG1	1.29091	1.13158	1.47269	0.000145268
TSHZ3	1.34873	1.14936	1.58269	0.000246781
THY1	1.22885	1.0841	1.39292	0.001269
MAFB	1.14807	1.02918	1.28071	0.0133014
NXN	1.21097	1.08442	1.35228	0.000675968
ZNF521	1.2529	1.09915	1.42815	0.000737727
EFEMP2	1.33228	1.16959	1.5176	1.57852e-05
MRAS	1.33223	1.12419	1.57876	0.000928587
LAYN	1.36225	1.13478	1.63532	0.000911869
ZNF532	1.43249	1.25479	1.63536	1.04583e-07
PKD2	1.247	1.09154	1.4246	0.0011567
SERPINF1	1.15483	1.04136	1.28066	0.00637175
PCOLCE	1.18671	1.06443	1.32305	0.00203424
ARL4C	1.36211	1.20418	1.54076	8.88819e-07
HOPX	1.31981	1.13882	1.52956	0.00022664
CHST11	1.21775	1.0572	1.40268	0.00631273
DPYSL3	1.234	1.10412	1.37916	0.000210838
RAI14	1.35081	1.17941	1.54713	1.40263e-05
C5AR1	1.18631	1.06774	1.31805	0.00147355
COL1A1	1.17645	1.0622	1.30299	0.00182282
PXDN	1.3	1.15511	1.46308	1.35265e-05
SERPING1	1.13535	1.02895	1.25274	0.0114585
FSTL1	1.27384	1.11884	1.45031	0.0002558
GLI3	1.45641	1.21576	1.74469	4.50002e-05
TWIST1	1.2081	1.08873	1.34055	0.000368538
TNFSF4	1.15888	1.03112	1.30246	0.0133556
C3orf80	1.23997	1.09354	1.40601	0.000794877
SYNC	1.20756	1.0654	1.36869	0.00316368
COLEC12	1.26759	1.14936	1.39798	2.06829e-06
SPP1	1.11636	1.04776	1.18945	0.000668835
NRP2	1.4861	1.27319	1.73461	5.13203e-07
OSMR	1.28958	1.13242	1.46856	0.000125368
PDGFRB	1.21887	1.07107	1.38706	0.002691
TSPYL5	1.35886	1.18163	1.56268	1.70398e-05
NUAK1	1.25335	1.09771	1.43106	0.000843686
QKI	1.38743	1.18168	1.62901	6.37747e-05
GPX8	1.19191	1.06189	1.33784	0.00289187
IL1R1	1.28274	1.11183	1.47993	0.000642493
FN1	1.17183	1.07414	1.2784	0.000356337
FBXL7	1.4187	1.20585	1.66911	2.47608e-05
CSGALNACT2	1.38358	1.16861	1.63809	0.000164166
MAGI2-AS3	1.47994	1.21078	1.80894	0.000129484
TMEM45A	1.15363	1.04224	1.27692	0.00580785
PTPRM	1.35769	1.15986	1.58926	0.00014147
C1R	1.15792	1.0353	1.29506	0.0102437
CHSY3	1.4907	1.27734	1.7397	4.06509e-07
CTSL	1.18632	1.04448	1.34742	0.00854188
CMTM3	1.33633	1.13895	1.56791	0.000377123
ATP8B2	1.25146	1.07201	1.46096	0.00450523
COL6A2	1.1754	1.05468	1.30993	0.00346796
PDGFC	1.24917	1.11816	1.39553	8.29493e-05
AKT3	1.54583	1.30186	1.83552	6.69384e-07
ZFPM2	1.4119	1.24602	1.59985	6.32137e-08
PALLD	1.22332	1.05389	1.41999	0.00804867
BNC2	1.35228	1.1449	1.59722	0.000380764
HS3ST3A1	1.22186	1.05328	1.41744	0.00816541
ITGA5	1.24825	1.1165	1.39554	9.76205e-05
MYO5A	1.25217	1.03489	1.51505	0.020739
NID2	1.21098	1.07191	1.3681	0.00210013
MIR100HG	1.27342	1.15517	1.40378	1.16946e-06
ISLR	1.21101	1.10333	1.3292	5.58739e-05
DOK5	1.37117	1.14812	1.63756	0.000492377
FIBIN	1.2518	1.12014	1.39892	7.46085e-05
CNRIP1	1.28653	1.11148	1.48914	0.000734313
SLC2A3	1.28513	1.1653	1.41728	5.08482e-07
MEIS1	1.24157	1.0967	1.40558	0.000630658
SFRP4	1.11467	1.04609	1.18775	0.000805509
CD93	1.2724	1.10986	1.45875	0.00055072
LAMA4	1.43268	1.19813	1.71316	8.0966e-05
NEXN	1.14972	1.0457	1.26409	0.00393116
AMOTL1	1.42867	1.2233	1.6685	6.61945e-06
WWTR1	1.29831	1.14504	1.47211	4.64285e-05
STON1	1.44229	1.23644	1.68242	3.14463e-06
TAGLN	1.21512	1.10779	1.33285	3.63382e-05
CDK14	1.39967	1.18757	1.64966	6.06483e-05
DKK3	1.21075	1.03053	1.4225	0.0200392
CACNA2D1	1.36388	1.15896	1.60502	0.000186976
TIMP3	1.23255	1.10527	1.37448	0.000170057
GLIS2	1.35831	1.20657	1.52914	4.04402e-07
C20orf194	1.42809	1.21871	1.67344	1.05686e-05
PCDH7	1.37534	1.18252	1.59959	3.54439e-05
TCF4	1.30055	1.1231	1.50603	0.000446383
MPDZ	1.39144	1.21242	1.59689	2.5868e-06
LINC01094	1.2076	1.04353	1.39746	0.0113451
ARMCX1	1.2589	1.12035	1.41459	0.000108766
CFH	1.1622	1.05189	1.28406	0.00313321
BICC1	1.26346	1.08503	1.47124	0.00260718
TNS1	1.30677	1.1678	1.46229	3.10403e-06
TREM1	1.13382	1.03665	1.24009	0.00600755
GJA1	1.29196	1.14928	1.45236	1.78449e-05
MCC	1.45865	1.22136	1.74203	3.07976e-05
CD163	1.1116	1.00886	1.2248	0.0325029
SYT11	1.30502	1.09174	1.55995	0.00345476
FBLN2	1.15053	1.05036	1.26025	0.0025519
SGCD	1.43799	1.21539	1.70137	2.30415e-05
ELK3	1.34344	1.11846	1.61369	0.0015936
EMILIN1	1.21459	1.08748	1.35655	0.000566825
PRKD1	1.41698	1.20336	1.66852	2.91112e-05
BASP1	1.17994	1.02908	1.35293	0.0177584
ALOX5AP	1.1157	1.002	1.2423	0.0458819
NR3C1	1.15544	1.00955	1.32242	0.0359073
PECAM1	1.18341	1.01473	1.38013	0.0318483
DZIP1	1.43736	1.20972	1.70783	3.71919e-05
CYP1B1	1.22883	1.12268	1.34503	7.81543e-06
OLFML1	1.25204	1.08757	1.44139	0.00175897
NAP1L3	1.35155	1.19204	1.5324	2.58371e-06
TUBA1A	1.31222	1.15254	1.49403	4.05454e-05
COL8A2	1.26399	1.12582	1.41911	7.29333e-05
ECM2	1.34206	1.175	1.53287	1.44052e-05
IGFBP5	1.18648	1.05941	1.3288	0.00309149
MRC1	1.09436	1.00461	1.19213	0.0388965
PPP1R18	1.37466	1.18718	1.59174	2.1034e-05
MGP	1.2056	1.11459	1.30404	3.02789e-06
GGT5	1.23126	1.08751	1.39401	0.00102228
ZNF469	1.2567	1.05893	1.49141	0.00891444
SPHK1	1.147	1.0234	1.28552	0.0183927
ITGAV	1.24998	1.07855	1.44866	0.00303005
MXRA8	1.30565	1.15598	1.4747	1.76014e-05
MMP14	1.29044	1.1225	1.4835	0.000337666
SYNDIG1	1.28078	1.10795	1.48057	0.000820005
SPARCL1	1.19953	1.0908	1.3191	0.000174971
THBD	1.22249	1.04003	1.43696	0.0148547
EFEMP1	1.22508	1.10297	1.36071	0.000151109
LOXL1	1.26118	1.1299	1.40771	3.50973e-05
PMP22	1.26973	1.08995	1.47917	0.00217162
MFAP5	1.1569	1.06967	1.25124	0.000268523
TM6SF1	1.18717	1.01316	1.39108	0.0338719
RHOJ	1.33869	1.12629	1.59114	0.00093565
TPST1	1.30537	1.12228	1.51834	0.000548177
AXL	1.34697	1.16479	1.55764	5.88354e-05
SLIT2	1.27274	1.14199	1.41846	1.29746e-05
UBE2E2	1.1838	1.05293	1.33093	0.0047593
HLX	1.38532	1.16053	1.65365	0.000308543
PLN	1.14128	1.06074	1.22793	0.000401344
PCDH17	1.23503	1.05662	1.44356	0.0080061
PHLDB2	1.32069	1.11361	1.56626	0.00139024
EVC	1.23077	1.03945	1.4573	0.0160014
LATS2	1.65223	1.35455	2.01533	7.26813e-07
FCGR2B	1.12232	1.0001	1.25949	0.0498031
AOC3	1.21055	1.10332	1.3282	5.39748e-05
C1orf54	1.23043	1.03498	1.46278	0.0187976
CLIP4	1.30846	1.10868	1.54423	0.00147037
EMP3	1.14055	1.0085	1.28989	0.0361907
CALCRL	1.17634	1.02548	1.34939	0.0203764
ITGA11	1.27235	1.11415	1.45302	0.000377128
MRC2	1.23971	1.08364	1.41827	0.00174809
CALU	1.36262	1.1157	1.66418	0.00241903
ADAMTS5	1.44362	1.2291	1.69559	7.70922e-06
EGR2	1.28451	1.15242	1.43174	6.11364e-06
DNM3OS	1.22981	1.05274	1.43667	0.00910989
TIMP1	1.39053	1.18615	1.63013	4.81179e-05
MAP1B	1.4326	1.26359	1.62421	1.99186e-08
RCN3	1.24367	1.08112	1.43065	0.00227784
TRPS1	1.40611	1.18838	1.66373	7.16531e-05
CCL2	1.09473	1.00002	1.19842	0.0499454
MSR1	1.14877	1.01612	1.29875	0.0267379
CHST15	1.29234	1.1099	1.50479	0.000957546
MSN	1.44044	1.21749	1.70423	2.10405e-05
HMCN1	1.29551	1.16828	1.4366	9.15656e-07
MXRA7	1.33826	1.15105	1.55591	0.000150896
PDLIM3	1.30445	1.15522	1.47295	1.80401e-05
TIE1	1.29244	1.09444	1.52628	0.00249857
CRISPLD1	1.33934	1.19592	1.49996	4.28151e-07
EFS	1.48412	1.26353	1.74323	1.51694e-06
CRISPLD2	1.28303	1.10666	1.48751	0.000955701
COL18A1	1.31546	1.15584	1.49711	3.26098e-05
TGFB3	1.26379	1.1026	1.44854	0.0007711
IGFBP7	1.39687	1.19768	1.62919	2.06262e-05
MLLT11	1.55536	1.34623	1.79698	2.03169e-09
AKAP12	1.26503	1.15231	1.38877	7.91715e-07
JAZF1	1.32569	1.13972	1.54201	0.000256385
AQP9	1.08775	1.00102	1.182	0.0472619
SERPINE1	1.28992	1.17698	1.41371	5.1712e-08
JAM3	1.3341	1.1363	1.56634	0.000430617
TGFB1I1	1.36584	1.20078	1.55359	2.09192e-06
TMEM47	1.19851	1.07623	1.33469	0.00097394
COL4A1	1.29527	1.13198	1.48211	0.000167783
COL6A1	1.17135	1.02698	1.33602	0.0184393
CDH2	1.40525	1.22086	1.6175	2.13182e-06
DACT1	1.21459	1.09184	1.35114	0.000348398
DPYD	1.24533	1.07433	1.44354	0.00359886
MRGPRF	1.14219	1.03196	1.2642	0.0102455
MS4A4A	1.1212	1.01002	1.24463	0.0317894
COX7A1	1.27346	1.11724	1.45153	0.000294458
MMP19	1.38259	1.1823	1.61681	4.96343e-05
KIF26B	1.4322	1.2476	1.64412	3.36097e-07
GAS7	1.19177	1.01605	1.39789	0.0311171
IFFO1	1.26835	1.04331	1.54193	0.0170593
SERPINH1	1.40085	1.19651	1.6401	2.7893e-05
EHD2	1.36403	1.18616	1.56856	1.33136e-05
DENND5A	1.49358	1.26727	1.76032	1.7072e-06
TCEAL7	1.28464	1.13593	1.45282	6.59728e-05
CERCAM	1.37083	1.19116	1.5776	1.08058e-05
TENM4	1.34001	1.14129	1.57333	0.000352003
CRYAB	1.32874	1.19211	1.48102	2.83359e-07
CD109	1.18181	1.06302	1.31388	0.00199691
SGCE	1.29845	1.1571	1.45707	8.93811e-06
GEM	1.31317	1.17328	1.46975	2.13329e-06
ZNF667-AS1	1.49274	1.26184	1.76589	2.97455e-06
COMP	1.17239	1.10413	1.24488	2.03265e-07
CLIC4	1.26493	1.11232	1.43847	0.000340012
CYBRD1	1.20011	1.08643	1.32568	0.000327414
TSPAN4	1.22174	1.05027	1.42121	0.0094416
MFGE8	1.30398	1.1355	1.49746	0.000169826
CALHM2	1.28137	1.09282	1.50245	0.00226576
KLHL5	1.23119	1.06814	1.41914	0.00411247
MARCO	1.18052	1.09034	1.27815	4.25057e-05
THBS1	1.17579	1.03095	1.34099	0.0157642
NDN	1.24332	1.10334	1.40106	0.000352056
PLAU	1.14944	1.01587	1.30058	0.0271174
PRICKLE1	1.56753	1.31759	1.86488	3.9339e-07
ARMCX2	1.36834	1.21679	1.53877	1.63964e-07
TREM2	1.14408	1.03685	1.26241	0.00734745
S1PR3	1.48807	1.2693	1.74454	9.62157e-07
SSPN	1.31628	1.12852	1.53527	0.00046559
PTPN14	1.74017	1.46405	2.06837	3.29205e-10
ITGBL1	1.26561	1.14355	1.40068	5.29981e-06
TMEM200B	1.25118	1.07846	1.45157	0.00311046
VSIG4	1.15895	1.05543	1.27263	0.00200214
MEDAG	1.20315	1.03833	1.39413	0.0138784
APOE	1.12066	1.0323	1.21657	0.00655301
PDE1A	1.38183	1.1456	1.66677	0.000722087
CAV1	1.20577	1.06479	1.36542	0.00318336
ANXA5	1.33151	1.10325	1.60701	0.00284453
LMCD1	1.4454	1.20364	1.73572	7.9878e-05
LTBP2	1.31054	1.15547	1.48641	2.5638e-05
COL24A1	1.31978	1.11192	1.5665	0.00150737
UBE2QL1	1.38315	1.17817	1.62379	7.38885e-05
BCL6	1.32089	1.11751	1.56128	0.00110525
GALNT15	1.32268	1.12547	1.55446	0.000686903
FLNA	1.26334	1.13772	1.40283	1.2171e-05
C14orf132	1.34537	1.16284	1.55654	6.66154e-05
RBMS1	1.25199	1.10658	1.4165	0.000359968
MFAP2	1.18914	1.06752	1.32462	0.00165059
MDFIC	1.20527	1.04118	1.39523	0.0124063
FZD1	1.38815	1.15159	1.6733	0.000580258
RGS2	1.13589	1.03161	1.25071	0.00950275
ISM1	1.37042	1.21906	1.54056	1.31142e-07
MEIS2	1.18334	1.06347	1.31673	0.00200644
CD248	1.23653	1.08498	1.40923	0.00145891
MS4A7	1.14159	1.02107	1.27634	0.0200026
MYH10	1.27005	1.11474	1.447	0.000327992
SRPX	1.20868	1.09728	1.33139	0.000122188
PRICKLE2	1.37485	1.18419	1.59621	2.92037e-05
KCNJ8	1.38997	1.21398	1.59148	1.86707e-06
SGIP1	1.34162	1.14937	1.56603	0.000195938
FEZ1	1.28986	1.05383	1.57875	0.0135686
CCDC88A	1.19047	1.00639	1.40823	0.0419282
MYCT1	1.41074	1.1563	1.72116	0.000695971
RHOQ	1.41223	1.15678	1.7241	0.000697521
COL4A2	1.30593	1.14051	1.49534	0.000112183
DOCK4	1.25128	1.03306	1.5156	0.0218715
CYS1	1.29713	1.12942	1.48974	0.000230552
LBH	1.25725	1.09134	1.4484	0.00152241
PTGIS	1.24207	1.11201	1.38734	0.000122417
CTSB	1.39787	1.17148	1.668	0.000202636
EBF1	1.39841	1.16776	1.67461	0.000265998
FAM20A	1.23259	1.04038	1.4603	0.0156196
DLC1	1.41566	1.1579	1.73081	0.000699994
NKX3-2	1.41392	1.21346	1.64749	8.98582e-06
P4HA3	1.43617	1.19317	1.72866	0.000129489
LAMC1	1.77092	1.46065	2.14711	6.0572e-09
EDNRA	1.21646	1.08821	1.35983	0.000566686
SLC24A3	1.14508	1.01871	1.28713	0.0231636
LAMB2	1.40678	1.21421	1.62988	5.51323e-06
CYYR1	1.26026	1.06884	1.48597	0.00592395
FBLN5	1.2065	1.07193	1.35797	0.00186392
PPP1R3C	1.25576	1.08299	1.4561	0.00256461
LTBP1	1.31355	1.15416	1.49496	3.59216e-05
ETS1	1.26095	1.07858	1.47417	0.00362604
ACTA2	1.34603	1.17739	1.53884	1.35639e-05
TGFBR1	1.25794	1.04634	1.51233	0.014607
FKBP7	1.29488	1.06992	1.56714	0.00795314
TWSG1	1.16139	1.001	1.34748	0.048486
PDGFRL	1.149	1.04893	1.25863	0.00281438
LDB2	1.44629	1.18059	1.77179	0.000366669
CLEC11A	1.37814	1.18928	1.597	1.99796e-05
MYL9	1.21478	1.08502	1.36007	0.000736603
TSHZ2	1.38117	1.18369	1.61159	4.09377e-05
HTRA3	1.18887	1.0459	1.35137	0.00813271
GNG11	1.19752	1.01965	1.40641	0.0280077
MYLK	1.20449	1.06221	1.36583	0.00371943
MMRN2	1.39501	1.17316	1.6588	0.000165071
FXYD6	1.23968	1.10872	1.38612	0.000162142
ZNF281	1.41849	1.1633	1.72967	0.000550886
SRGAP2C	1.46116	1.2217	1.74756	3.28602e-05
LRRC15	1.14912	1.02184	1.29224	0.0203033
MEF2C	1.19635	1.01572	1.4091	0.0318101
UNC5B	1.3201	1.11847	1.55807	0.00102368
CFL2	1.22864	1.08141	1.3959	0.00156788
ECSCR	1.24552	1.03467	1.49935	0.0203354
C5orf46	1.22335	1.10511	1.35424	0.000101427
LRRC32	1.27611	1.10587	1.47255	0.000845307
CNN1	1.1218	1.04601	1.20309	0.0012802
BOC	1.34902	1.16543	1.56152	6.04263e-05
CAV2	1.39246	1.20564	1.60823	6.65944e-06
DPT	1.11302	1.02195	1.21221	0.0139534
ARSI	1.28428	1.10468	1.49309	0.00113303
FYN	1.24905	1.09244	1.42811	0.0011403
C11orf96	1.22334	1.09526	1.36639	0.000353378
SH3BP5	1.33912	1.12744	1.59056	0.000880355
CCDC8	1.43807	1.2217	1.69276	1.26014e-05
HSPB8	1.17902	1.05048	1.32329	0.00517214
JAM2	1.23398	1.07039	1.42258	0.0037637
TRPC1	1.39141	1.17809	1.64335	0.000100166
MEOX2	1.27057	1.11828	1.4436	0.000236882
LIX1L	1.36016	1.14417	1.61692	0.000489471
APOC1	1.0949	1.00319	1.19501	0.0422318
COL5A3	1.22413	1.06874	1.40211	0.00350189
CDH5	1.23616	1.06908	1.42936	0.00421568
COPZ2	1.32342	1.13353	1.54511	0.000390966
STOM	1.18853	1.02096	1.3836	0.0259192
GPR137B	1.44235	1.20705	1.72352	5.55764e-05
MN1	1.31457	1.1696	1.4775	4.47749e-06
PDLIM7	1.53982	1.28555	1.84438	2.76168e-06
IGFBP6	1.25109	1.11444	1.40448	0.000146978
TUSC3	1.23622	1.04452	1.46309	0.0136371
SMARCA1	1.43788	1.2721	1.62526	6.22315e-09
FGF7	1.22927	1.073	1.4083	0.00292378
PLXND1	1.29821	1.09236	1.54284	0.00304793
ADAMTS1	1.21958	1.09415	1.35938	0.000336971
EPYC	1.14668	1.07219	1.22634	6.49912e-05
PDLIM4	1.3193	1.13645	1.53158	0.000272349
OSCAR	1.16988	1.00208	1.36576	0.0469992
LOXL2	1.21775	1.02892	1.44123	0.0219264
CORIN	1.29293	1.08623	1.53898	0.00384544
TGFB1	1.21245	1.0454	1.4062	0.0108675
PRELP	1.24478	1.13426	1.36607	3.9202e-06
SLC11A1	1.37801	1.16268	1.63323	0.000216851
NOTCH3	1.4322	1.2213	1.67952	9.88204e-06
HSD17B6	1.26663	1.14075	1.4064	9.60767e-06
FBLN1	1.16514	1.04431	1.29995	0.00621675
IGFBP3	1.33779	1.18548	1.50968	2.37207e-06
PBX3	1.32724	1.13209	1.55602	0.000484819
EML1	1.24456	1.0774	1.43765	0.00294839
MAGEH1	1.26036	1.09801	1.44671	0.00100595
STC1	1.20165	1.06639	1.35405	0.00256899
CCDC102B	1.26512	1.09396	1.46305	0.0015199
RGS16	1.31901	1.1365	1.53083	0.00026859
RGS4	1.29308	1.14024	1.4664	6.2074e-05
PTHLH	1.25244	1.06772	1.46912	0.00569541
FGFR1	1.3157	1.10897	1.56096	0.00165555
CXCL12	1.13449	1.02019	1.26158	0.0198594
DEGS1	1.20873	1.01207	1.44362	0.0364072
FBXO32	1.24854	1.07884	1.44493	0.0029005
COL16A1	1.22398	1.08711	1.37809	0.000836349
HIF1A	1.21138	1.02239	1.4353	0.0267003
LRCH2	1.2414	1.05971	1.45424	0.00740038
MCEMP1	1.22049	1.08597	1.37167	0.000825125
RASSF8	1.23633	1.03482	1.47708	0.0194358
HSPB2	1.36344	1.15052	1.61577	0.000345609
TRIB2	1.16549	1.03489	1.31258	0.0115499
FSTL3	1.2643	1.10496	1.44661	0.000644314
ITPR1	1.23545	1.03318	1.47731	0.0204611
CSRP2	1.39155	1.18102	1.63962	7.88644e-05
ESAM	1.36357	1.15336	1.6121	0.000283263
RNF144A	1.23777	1.02612	1.49307	0.0257837
LMOD1	1.16622	1.06743	1.27416	0.000661971
MCAM	1.29843	1.11203	1.51607	0.000956551
C8orf88	1.28293	1.12374	1.46467	0.000228019
VASN	1.32196	1.1175	1.56383	0.00113062
PNMA1	1.26861	1.10877	1.45149	0.0005348
CHST3	1.29319	1.09542	1.52666	0.00239626
AHNAK2	1.30934	1.17514	1.45886	1.03371e-06
GULP1	1.39229	1.20215	1.6125	9.98486e-06
PFKFB3	1.37831	1.15946	1.63847	0.000275664
EVL	1.31184	1.10434	1.55833	0.00200312
DIO2	1.21859	1.05072	1.41329	0.00894534
CPXM1	1.13707	1.00543	1.28594	0.0407374
TCEAL3	1.35602	1.17387	1.56644	3.50077e-05
ITGA1	1.27154	1.07995	1.49712	0.00393964
ARHGEF17	1.41917	1.2074	1.66808	2.17882e-05
GYPC	1.20285	1.03038	1.40419	0.0193384
NPR3	1.52562	1.32154	1.76121	8.15949e-09
THBS4	1.16447	1.07926	1.25641	8.59087e-05
MAB21L2	1.12313	1.03035	1.22427	0.00829909
ATP2B4	1.30349	1.12547	1.50968	0.00040391
STEAP4	1.19065	1.02905	1.37763	0.0190414
SCG2	1.30106	1.18057	1.43385	1.11034e-07
LAMA2	1.24689	1.09219	1.4235	0.00109547
LYVE1	1.14796	1.01083	1.30369	0.0335061
FSCN1	1.15935	1.05188	1.27779	0.00289092
GADD45B	1.54016	1.31222	1.8077	1.25764e-07
RERG	1.23683	1.09562	1.39624	0.000589486
TPM2	1.30167	1.12642	1.50417	0.000352109
CYTL1	1.16789	1.01155	1.34839	0.0343004
ZCCHC24	1.18789	1.05532	1.33712	0.00434857
LDOC1	1.34657	1.16108	1.56168	8.31873e-05
PAM	1.25836	1.06237	1.4905	0.0078057
ROR2	1.13273	1.00734	1.27373	0.0373235
DNAJB4	1.24479	1.075	1.44139	0.00342723
F13A1	1.12805	1.03588	1.22842	0.00559805
LY86	1.17731	1.014	1.36693	0.0321619
CILP	1.20476	1.09318	1.32773	0.000172151
RASL12	1.18595	1.00418	1.40063	0.0445276
PI15	1.16121	1.01191	1.33254	0.0332886
KCNMB1	1.20764	1.04698	1.39296	0.00958906
APLNR	1.1613	1.02171	1.31996	0.0220983
HTR2B	1.22296	1.12245	1.33248	4.22624e-06
EMCN	1.2301	1.05545	1.43365	0.00803259
KDR	1.32012	1.12002	1.55597	0.000928117
TMEM255A	1.2723	1.09586	1.47716	0.00156836
AMIGO2	1.22308	1.10889	1.34903	5.65171e-05
CRIP2	1.26304	1.10901	1.43847	0.000432628
LAMP5	1.31987	1.18103	1.47503	9.87929e-07
A2M	1.22429	1.04713	1.43142	0.0111675
MMP11	1.22917	1.11407	1.35618	3.90424e-05
MATN3	1.24048	1.13153	1.35991	4.33457e-06
C1QTNF3	1.4709	1.25288	1.72685	2.42596e-06
CPQ	1.24238	1.07678	1.43345	0.00294444
TSPAN2	1.1523	1.01831	1.30392	0.0245977
CAP2	1.26573	1.09894	1.45784	0.00108061
FST	1.33165	1.1619	1.52622	3.8453e-05
HOXB2	1.25297	1.11195	1.41187	0.000214093
S100A4	1.19828	1.08416	1.3244	0.00039635
FABP4	1.19794	1.10769	1.29554	6.2092e-06
RAB23	1.20808	1.0385	1.40536	0.0143078
RTN1	1.20501	1.04565	1.38864	0.00997147
PLK2	1.22947	1.10312	1.37029	0.000188663
HOMER3	1.46948	1.24995	1.72757	3.12547e-06
PCSK5	1.29515	1.13476	1.47822	0.000125998
BEX4	1.15041	1.04349	1.26829	0.00487505
SETBP1	1.22192	1.05113	1.42047	0.0090796
SGK1	1.18899	1.04346	1.35481	0.00935852
PODXL	1.33458	1.13362	1.57117	0.000527962
RDX	1.21128	1.06071	1.38323	0.00465223
ANXA1	1.17298	1.04729	1.31376	0.00579953
SLC43A3	1.14849	1.02841	1.28259	0.0140057
SIGLEC1	1.16758	1.01726	1.3401	0.0275709
DKK2	1.19904	1.03829	1.38469	0.0134533
SHISA2	1.15316	1.04313	1.2748	0.00534785
GLIS3	1.35159	1.17889	1.5496	1.56526e-05
G0S2	1.13755	1.03174	1.25421	0.00967581
CD36	1.37583	1.20488	1.57103	2.43749e-06
GPX7	1.18017	1.04096	1.33799	0.00968875
ANGPTL1	1.15777	1.03593	1.29393	0.00981633
DBN1	1.33963	1.16672	1.53815	3.36929e-05
HSPG2	1.27529	1.1214	1.45028	0.000210215
ZNF331	1.22359	1.06201	1.40976	0.0052303
INMT	1.20995	1.04985	1.39446	0.00849389
TPBG	1.37475	1.18173	1.5993	3.73691e-05
SYNPO2	1.14595	1.05259	1.24758	0.00167683
HSD11B2	0.861126	0.777977	0.953161	0.00390313
MYADM	1.33789	1.14131	1.56831	0.000330387
OMD	1.22652	1.09371	1.37547	0.000479884
SUGCT	1.33347	1.16633	1.52455	2.53294e-05
MYOF	1.26826	1.07831	1.49168	0.00409599
CSGALNACT1	1.19789	1.05593	1.35894	0.00502244
CDH13	1.18433	1.02189	1.37259	0.0245971
SPON1	1.11799	1.02656	1.21757	0.0104053
POPDC2	1.17337	1.02555	1.3425	0.0199523
LAMB1	1.33569	1.13508	1.57177	0.00049073
GPX3	1.27301	1.1574	1.40017	6.72505e-07
BNIP3L	1.19258	1.02132	1.39257	0.0259733
GBP5	0.883894	0.788437	0.990908	0.034293
SELENBP1	0.866403	0.797846	0.940852	0.000650628
CPXM2	1.22843	1.08147	1.39536	0.00155251
GBP1	0.879544	0.779673	0.992207	0.0368714
VWF	1.29333	1.11418	1.50129	0.000721922
FHL1	1.16769	1.05616	1.291	0.00247118
CDKN2B	1.15851	1.02023	1.31552	0.0232793
ACTG2	1.11199	1.01761	1.21512	0.018987
PDZRN4	1.22743	1.08427	1.3895	0.00120088
GRP	1.17546	1.08259	1.2763	0.000118222
MYH11	1.11476	1.03165	1.20457	0.00599234
ADAM8	1.21031	1.03997	1.40856	0.0136497
CALB2	1.18341	1.0755	1.30214	0.000556437
ENO2	1.21693	1.09165	1.35659	0.000397104
PRNP	1.20877	1.04452	1.39885	0.0109417
UCHL1	1.22532	1.08022	1.38992	0.00157872
KANK4	1.37646	1.23532	1.53372	7.09815e-09
LINC01116	1.18604	1.05893	1.3284	0.0031775
ECM1	1.28916	1.13517	1.46404	9.09939e-05
C7	1.20472	1.09463	1.32589	0.00013946
ENPP2	1.1727	1.04685	1.31367	0.0059519
EMP1	1.28488	1.11657	1.47855	0.000466644
PLAT	1.26504	1.10998	1.44176	0.00042523
RBPMS2	1.22154	1.0981	1.35886	0.000231639
CDX1	0.785991	0.699773	0.882831	4.86191e-05
OGN	1.11001	1.02278	1.20469	0.012444
GXYLT2	1.13327	1.01401	1.26655	0.0274445
DPYSL2	1.25618	1.09734	1.43802	0.000943956
OLFML3	1.12963	1.0132	1.25944	0.0280786
HSPB7	1.18666	1.03976	1.3543	0.0111394
CBX6	1.26245	1.10079	1.44785	0.000857614
ANO1	1.12645	1.01942	1.24472	0.0194123
PLOD2	1.15085	1.00995	1.3114	0.0349801
IGFBP4	1.26945	1.10852	1.45374	0.000561642
DAPK1	1.14908	1.00874	1.30895	0.0365381
C10orf99	0.948185	0.901628	0.997145	0.038335
RAMP1	1.0916	1.00872	1.18129	0.029598
TCEAL2	1.18105	1.0513	1.32681	0.00506954
ZBED2	1.15064	1.02572	1.29077	0.0167073
ANGPTL4	1.26384	1.10948	1.43968	0.000426462
SYNM	1.0888	1.01489	1.16808	0.0176876
SULF2	1.15005	1.00436	1.31688	0.0430853
DES	1.0763	1.00749	1.1498	0.02916
WASF1	1.33425	1.169	1.52285	1.91377e-05
MMP1	0.940109	0.890406	0.992587	0.0258505
BCHE	1.18109	1.0754	1.29717	0.0005018
FKBP10	1.23018	1.10848	1.36524	9.71487e-05
FLNC	1.16565	1.04157	1.30451	0.00760341
CLU	1.16974	1.05296	1.29948	0.00348241
MEGF6	1.17033	1.04442	1.31142	0.00676303
EGR3	1.22126	1.10419	1.35073	0.000101151
PLA1A	1.11102	1.00236	1.23145	0.0449706
PHGR1	0.831716	0.746255	0.926963	0.000865516
CXCL10	0.843653	0.784987	0.906703	3.77599e-06
RRAGD	1.16521	1.04017	1.30528	0.00829135
CDX2	0.855981	0.776684	0.943374	0.00171728
CXCL9	0.847194	0.788809	0.909901	5.32416e-06
DHRS11	0.875925	0.776932	0.987532	0.0303868
APOD	1.1718	1.09006	1.25967	1.73027e-05
HOXC6	1.09059	1.01596	1.1707	0.0164943
DUSP5	1.26234	1.12204	1.42019	0.000106399
PRR15	0.862178	0.766359	0.969977	0.0136215
DDC	0.849205	0.776795	0.928365	0.0003249
P2RY13	0.863598	0.761663	0.979176	0.0221173
CXCL13	0.884363	0.828533	0.943956	0.000221228
NAT2	0.905015	0.824861	0.992958	0.0349175
CRABP2	1.17093	1.07294	1.27787	0.000402045
MMP12	0.890435	0.828768	0.956691	0.00152925
CASQ2	1.16833	1.05816	1.28998	0.00208018
VIP	1.09594	1.02015	1.17735	0.0122262
GPA33	0.857272	0.782008	0.939779	0.00102075
IGFL2	1.09595	1.0026	1.19799	0.0436915
CCL5	0.89175	0.81023	0.981473	0.019166
GBP4	0.831053	0.739968	0.93335	0.00178098
DUOX2	0.94736	0.897812	0.999642	0.0484927
CDHR1	0.910115	0.846877	0.978075	0.0103677
SPINK1	0.902329	0.848116	0.960007	0.00114989
SLC51B	0.905133	0.821282	0.997545	0.0444824
LCN2	0.926391	0.870734	0.985605	0.0155798
CCL20	0.902004	0.839913	0.968685	0.00459245
KLK10	1.19394	1.11224	1.28165	9.53209e-07
RNF186	0.884297	0.809824	0.965618	0.00615476
DUSP4	1.09078	1.00766	1.18076	0.0316587
CXCL11	0.893017	0.838985	0.950528	0.000380448
AKR1B10	0.92179	0.862607	0.985033	0.0161557
CLCA1	0.948155	0.91241	0.9853	0.00662158
KRT6A	1.14728	1.07739	1.2217	1.83057e-05
FCGBP	0.950334	0.905678	0.997193	0.0380377
FABP1	0.940801	0.89039	0.994066	0.0298723
MMP3	0.922223	0.871516	0.975879	0.00501329
PIGR	0.91	0.869728	0.952137	4.43318e-05
ITLN1	0.936325	0.897976	0.976311	0.0020452
RETNLB	0.909471	0.854325	0.968175	0.00294543
SPINK4	0.949945	0.911298	0.990231	0.0153844
REG3A	0.947317	0.899962	0.997164	0.0385907
HEPACAM2	0.923356	0.872723	0.976925	0.00558329
